# Supplementary material for: Post-covid-19 conditions in adults: systematic review and meta-analysis of health outcomes in controlled studies
Source: PubMed Central journal article supplement — BMJ Med. 2024 Jan 29;3(1):e000723. doi: 10.1136/bmjmed-2023-000723 (PMC10826558; doi:10.1136/bmjmed-2023-000723), 2024-01-29
Supplement: bmjmed-2023-000723supp001.pdf [file bmjmed-2023-000723supp001.pdf]

## SUPPLEMENTARY MATERIAL 1: Post-Covid Conditions in Adults: a Systematic Review and Meta-analysis of controlled studies

### Search strategy

#### Cochrane COVID-19 Study Register (CCSR) (run via Cochrane internal platform CRS Web)

1. (after ADJ2 acute ADJ2 (SARS-CoV\* OR COVID\*)):TI,AB
2. ((long OR persist\* OR prolong\*) ADJ3 symptom\*):TI,AB
3. (long ADJ2 COVID\*):TI,AB
4. sequelae:TI,AB
5. (coronavirus disease OR COVID\*) ADJ2 (surviv\*):TI,AB
6. (acute ADJ2 (phase OR COVID\* OR SARS-CoV\*)):TI,AB
7. (after ADJ2 infectio\*):TI,AB
8. #1 OR #2 OR #3 OR #4 OR #5 OR #6 OR #7
9. cohort\*:TI,AB
10. #8 AND #9

= 2986

#### WHO Global literature on coronavirus disease database

((("after acute" AND (SARS-CoV OR COVID OR COVID19)) OR ("post acute" AND (SARS-CoV OR COVID OR COVID19)) OR ("persistent symptom" OR "persisting symptom" OR "prolonged symptom" OR "persistent symptoms" OR "persisting symptoms" OR "prolonged symptoms") OR ("long COVID" OR "long COVID19") OR ("post COVID" OR "postacute COVID" OR "post acute COVID" OR "post COVID19" OR "postacute COVID19" OR "post acute COVID19" OR "post coronavirus" OR "postacute coronavirus" OR "post acute coronavirus" OR "post SARS-CoV" OR "postacute SARS-CoV" OR "post acute SARS-CoV") OR (sequelae) OR ("coronavirus disease survivors" OR "COVID survivors" OR "COVID-19 survivors" OR "COVID19 survivors") OR ("acute phase" OR "acute COVID" OR "acute COVID19" OR "acute SARS-CoV") OR ("after infection"))) AND (cohort)

= 4393

Databases excluded: MEDLINE, EMBASE, ICTRP, PubMed (as included in CCSR)

= 839

#### **Known relevant references used to develop the search strategy for the CCSR**

24 relevant cohort studies identified from the evidence map

- 23/24 available in PubMed (1 medRxiv only, available in CCSR), 24/24 available in CCSR

- 2 PMIDs don't have abstracts, difficult to retrieve (32468632 Li + 33684323 Hua-Huy)

#### 23 PMIDs + 1 CRSID

32468632[PMID] OR 35319081[PMID] OR 33873048[PMID] OR 33909072[PMID] OR 33932157[PMID] OR 34437579[PMID] OR 34060710[PMID] OR 33789877[PMID] OR 33785495[PMID] OR 33684323[PMID] OR 34285348[PMID] OR 35705635[PMID] OR 34396141[PMID] OR 35090015[PMID] OR 33984263[PMID] OR 34011492[PMID] OR 34387310[PMID] OR 34582441[PMID] OR 34060217[PMID] OR 35279711[PMID] OR 34470828[PMID] OR 35211871[PMID] OR 34035155[PMID] + CRSID 14964018
