# Supplementary material for: Post-covid-19 conditions in adults: systematic review and meta-analysis of health outcomes in controlled studies
Source: PubMed Central journal article supplement — BMJ Med. 2024 Jan 29;3(1):e000723. doi: 10.1136/bmjmed-2023-000723 (PMC10826558; doi:10.1136/bmjmed-2023-000723), 2024-01-29
Supplement: bmjmed-2023-000723supp002.pdf [file bmjmed-2023-000723supp002.pdf]

## SUPPLEMENTARY MATERIAL 2: Post-Covid Conditions in Adults: a Systematic Review and Meta-analysis of controlled studies

### Table of contents

|                                                                      |   |
|----------------------------------------------------------------------|---|
| Supplementary figure 1. Summary of the quality assessment            | 1 |
| Supplementary Figure 2. Quality assessment of the individual studies | 2 |

## Supplementary figure 1. Summary of the quality assessment

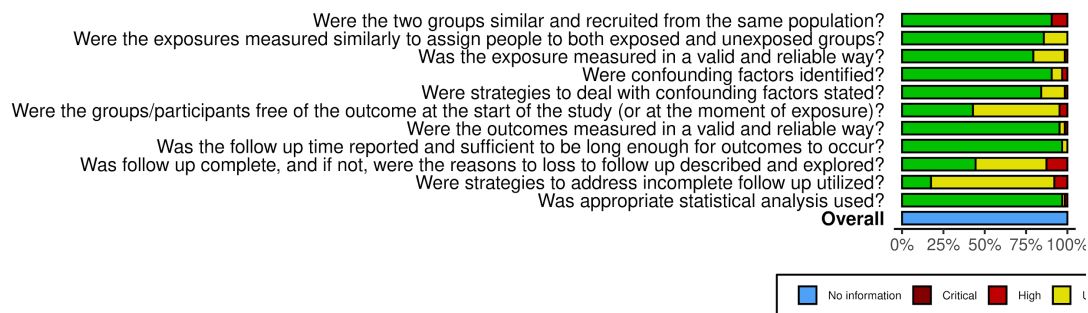

## Supplementary Figure 2. Quality assessment of the individual studies

| Study               | Risk of bias |    |    |    |    |    |    |    |    |     |     | Overall |
|---------------------|--------------|----|----|----|----|----|----|----|----|-----|-----|---------|
|                     | D1           | D2 | D3 | D4 | D5 | D6 | D7 | D8 | D9 | D10 | D11 |         |
| Abel 2021           | +            | +  | +  | +  | +  | +  | +  | +  | +  | +   | +   | +       |
| Al-Aly 2022         | +            | +  | +  | +  | +  | -  | +  | +  | -  | +   | +   | +       |
| Amin-Chowdhury 2021 | +            | +  | +  | +  | +  | -  | +  | +  | +  | -   | +   | +       |
| Ayoubkhani 2021     | +            | +  | +  | +  | +  | -  | +  | +  | +  | -   | +   | +       |
| Bailouz 2022        | +            | +  | -  | +  | +  | -  | +  | +  | +  | -   | +   | +       |
| Birkelo 2021        | +            | +  | -  | +  | +  | +  | +  | +  | +  | -   | +   | +       |
| Buonsenso 2022      | +            | +  | +  | +  | +  | -  | +  | +  | +  | -   | +   | +       |
| Caspersenlh 2022    | +            | +  | +  | +  | +  | -  | +  | +  | +  | -   | +   | +       |
| Cheung 2022         | +            | +  | +  | +  | +  | -  | +  | +  | +  | -   | +   | +       |
| Chevinsky 2021      | +            | +  | -  | +  | +  | -  | +  | +  | +  | -   | +   | +       |
| Cohen 2022          | +            | +  | +  | +  | +  | -  | +  | +  | +  | -   | +   | +       |
| Coleman 2021        | +            | +  | +  | +  | +  | -  | +  | +  | +  | -   | +   | +       |
| Cortés Zamora 2022  | +            | +  | +  | +  | +  | +  | +  | +  | +  | -   | +   | +       |
| Daugherty 2021      | +            | +  | +  | +  | +  | -  | +  | +  | +  | -   | +   | +       |
| DeMartino 2022      | +            | +  | -  | +  | +  | -  | +  | +  | +  | -   | +   | +       |
| Desgranges 2022     | +            | +  | +  | +  | +  | +  | +  | +  | +  | +   | +   | +       |
| Gamberini 2021      | +            | +  | +  | +  | +  | -  | +  | +  | +  | +   | +   | +       |
| Haberland 2022      | +            | +  | +  | +  | -  | -  | +  | +  | +  | -   | +   | +       |
| Haddad 2022         | +            | +  | +  | +  | +  | -  | +  | +  | +  | -   | +   | +       |
| Hou 2021            | +            | +  | +  | +  | +  | +  | +  | +  | +  | -   | +   | +       |
| Huang 2022          | +            | +  | -  | +  | +  | -  | +  | +  | +  | +   | +   | +       |
| Jacob 2022          | +            | +  | -  | +  | +  | +  | +  | +  | -  | -   | +   | +       |
| Klawitter 2022      | +            | +  | +  | +  | +  | -  | +  | +  | -  | -   | +   | +       |
| Knight 2022         | +            | +  | +  | +  | +  | -  | +  | +  | -  | -   | +   | +       |
| Lapin 2022          | +            | +  | +  | +  | +  | +  | +  | +  | -  | -   | +   | +       |
| Liu 2022            | +            | +  | +  | +  | +  | +  | +  | +  | +  | +   | +   | +       |
| Lund 2021           | +            | +  | +  | +  | +  | +  | +  | +  | +  | +   | +   | +       |
| Magnusdottir 2022   | +            | -  | -  | +  | +  | -  | +  | +  | +  | +   | +   | +       |
| Magnusson 2022      | +            | +  | +  | +  | +  | +  | +  | +  | -  | -   | +   | +       |
| Mainous 2021        | +            | +  | +  | +  | +  | +  | +  | +  | +  | +   | +   | +       |
| McNaughton 2022     | +            | +  | +  | +  | +  | +  | +  | +  | -  | -   | +   | +       |
| Murata 2022         | +            | -  | -  | +  | +  | +  | +  | +  | -  | -   | +   | +       |
| Nehme 2022          | +            | +  | +  | +  | +  | +  | +  | +  | -  | -   | +   | +       |
| Noviello 2021       | +            | +  | +  | +  | +  | +  | +  | +  | -  | -   | +   | +       |
| O'Sullivan 2022     | +            | +  | +  | +  | +  | +  | +  | +  | -  | -   | +   | +       |
| OhTk 2020           | +            | +  | -  | +  | +  | +  | +  | -  | -  | -   | +   | +       |

(cont)

|                       |   |   |   |   |   |   |   |   |   |   |   |   |
|-----------------------|---|---|---|---|---|---|---|---|---|---|---|---|
| Oliila 2022           | ⊗ | ⊖ | ⊕ | ⊕ | ⊕ | ⊕ | ⊕ | ⊕ | ⊕ | ⊖ | ⊖ | ⊕ |
| Park 2021             | ⊕ | ⊕ | ⊕ | ⊕ | ⊕ | ⊕ | ⊕ | ⊕ | ⊕ | ⊖ | ⊖ | ⊕ |
| Patel 2022            | ⊕ | ⊕ | ⊕ | ⊕ | ⊕ | ⊕ | ⊕ | ⊕ | ⊖ | ⊖ | ⊖ | ⊕ |
| Pell 2022             | ⊕ | ⊕ | ⊕ | ⊕ | ⊕ | ⊖ | ⊕ | ⊕ | ⊗ | ⊗ | ⊗ | ⊕ |
| Platteel 2022         | ⊕ | ⊕ | ⊕ | ⊕ | ⊕ | ⊖ | ⊕ | ⊕ | ⊗ | ⊗ | ⊗ | ⊕ |
| Priyadarshni 2022     | ⊕ | ⊖ | ⊕ | ⊗ | ⊖ | ⊕ | ⊕ | ⊕ | ⊖ | ⊖ | ⊖ | ⊕ |
| Rathmann 2022         | ⊕ | ⊖ | ⊖ | ⊕ | ⊕ | ⊕ | ⊖ | ⊕ | ⊖ | ⊖ | ⊖ | ⊕ |
| Rezel-Potts 2022      | ⊕ | ⊕ | ⊗ | ⊕ | ⊖ | ⊕ | ⊖ | ⊕ | ⊖ | ⊖ | ⊖ | ⊖ |
| Rivera-Izquierdo 2022 | ⊕ | ⊖ | ⊕ | ⊕ | ⊕ | ⊗ | ⊕ | ⊕ | ⊕ | ⊕ | ⊕ | ⊕ |
| Roessler 2021         | ⊕ | ⊖ | ⊕ | ⊕ | ⊕ | ⊖ | ⊕ | ⊕ | ⊖ | ⊖ | ⊖ | ⊕ |
| SandmannFg 2022       | ⊕ | ⊕ | ⊕ | ⊕ | ⊕ | ⊖ | ⊕ | ⊕ | ⊗ | ⊖ | ⊖ | ⊕ |
| Sharma 2022           | ⊕ | ⊖ | ⊖ | ⊕ | ⊕ | ⊗ | ⊕ | ⊕ | ⊖ | ⊖ | ⊖ | ⊕ |
| SnellerMc 2022        | ⊕ | ⊖ | ⊕ | ⊕ | ⊕ | ⊕ | ⊕ | ⊕ | ⊕ | ⊕ | ⊕ | ⊕ |
| Soraas 2021           | ⊕ | ⊕ | ⊕ | ⊕ | ⊕ | ⊖ | ⊕ | ⊕ | ⊗ | ⊖ | ⊖ | ⊕ |
| Spiliopoulos 2022     | ⊕ | ⊕ | ⊕ | ⊕ | ⊕ | ⊖ | ⊕ | ⊕ | ⊗ | ⊖ | ⊖ | ⊕ |
| Subramanian 2022      | ⊕ | ⊕ | ⊕ | ⊕ | ⊕ | ⊖ | ⊕ | ⊕ | ⊗ | ⊖ | ⊖ | ⊕ |
| Taquet 2021           | ⊕ | ⊕ | ⊕ | ⊕ | ⊕ | ⊖ | ⊕ | ⊕ | ⊖ | ⊖ | ⊖ | ⊕ |
| TartofSy 2022         | ⊕ | ⊕ | ⊕ | ⊕ | ⊖ | ⊖ | ⊕ | ⊕ | ⊖ | ⊖ | ⊖ | ⊕ |
| Tuvali 2022           | ⊕ | ⊕ | ⊕ | ⊖ | ⊖ | ⊖ | ⊕ | ⊕ | ⊖ | ⊖ | ⊖ | ⊕ |
| Wander 2022           | ⊕ | ⊕ | ⊕ | ⊕ | ⊕ | ⊕ | ⊕ | ⊕ | ⊖ | ⊖ | ⊖ | ⊕ |
| Wang 2022a            | ⊕ | ⊕ | ⊕ | ⊕ | ⊕ | ⊖ | ⊕ | ⊕ | ⊖ | ⊖ | ⊖ | ⊕ |
| Wang 2022b            | ⊕ | ⊕ | ⊕ | ⊕ | ⊕ | ⊕ | ⊕ | ⊕ | ⊖ | ⊖ | ⊖ | ⊕ |
| Welk 2021             | ⊕ | ⊕ | ⊕ | ⊖ | ⊖ | ⊕ | ⊕ | ⊕ | ⊕ | ⊕ | ⊕ | ⊕ |
| Whittaker 2021        | ⊕ | ⊕ | ⊖ | ⊖ | ⊖ | ⊕ | ⊕ | ⊖ | ⊖ | ⊖ | ⊖ | ⊕ |
| Wyller 2022           | ⊕ | ⊕ | ⊕ | ⊕ | ⊖ | ⊖ | ⊕ | ⊕ | ⊕ | ⊕ | ⊕ | ⊕ |
| Xiong 2021            | ⊕ | ⊕ | ⊕ | ⊖ | ⊖ | ⊖ | ⊗ | ⊕ | ⊕ | ⊕ | ⊕ | ⊕ |
| Zarifkar 2022         | ⊕ | ⊕ | ⊕ | ⊕ | ⊕ | ⊖ | ⊕ | ⊕ | ⊖ | ⊖ | ⊖ | ⊕ |

D1: Were the two groups similar and recruited from the same population?  
 D2: Were the exposures measured similarly to assign people to both exposed and unexposed groups?  
 D3: Was the exposure measured in a valid and reliable way?  
 D4: Were confounding factors identified?  
 D5: Were strategies to deal with confounding factors stated?  
 D6: Were the groups/participants free of the outcome at the start of the study (or at the moment of exposure)?  
 D7: Were the outcomes measured in a valid and reliable way?  
 D8: Was the follow up time reported and sufficient to be long enough for outcomes to occur?  
 D9: Was follow up complete, and if not, were the reasons for loss to follow up described and explored?  
 D10: Were strategies to address incomplete follow up utilized?  
 D11: Was appropriate statistical analysis used?

Judgement  
 ⊗ High  
 ⊖ Unclear  
 ⊕ Low  
 ○ Not applicable
