# Supplementary material for: Post-covid-19 conditions in adults: systematic review and meta-analysis of health outcomes in controlled studies
Source: PubMed Central journal article supplement — BMJ Med. 2024 Jan 29;3(1):e000723. doi: 10.1136/bmjmed-2023-000723 (PMC10826558; doi:10.1136/bmjmed-2023-000723), 2024-01-29

**SUPPLEMENTARY MATERIAL 3: Post-Covid Conditions in Adults: a Systematic Review and Meta-analysis of controlled studies****Table of contents**

|                                                                                           |          |
|-------------------------------------------------------------------------------------------|----------|
| <b>Analysis: Use of healthcare resources</b>                                              | <b>2</b> |
| <b>Supplementary Table - Estimated rates of resource use in COVID and control groups.</b> | <b>3</b> |
| <b>Analysis: Incident use of new drugs</b>                                                | <b>4</b> |

# Analysis: Use of healthcare resources

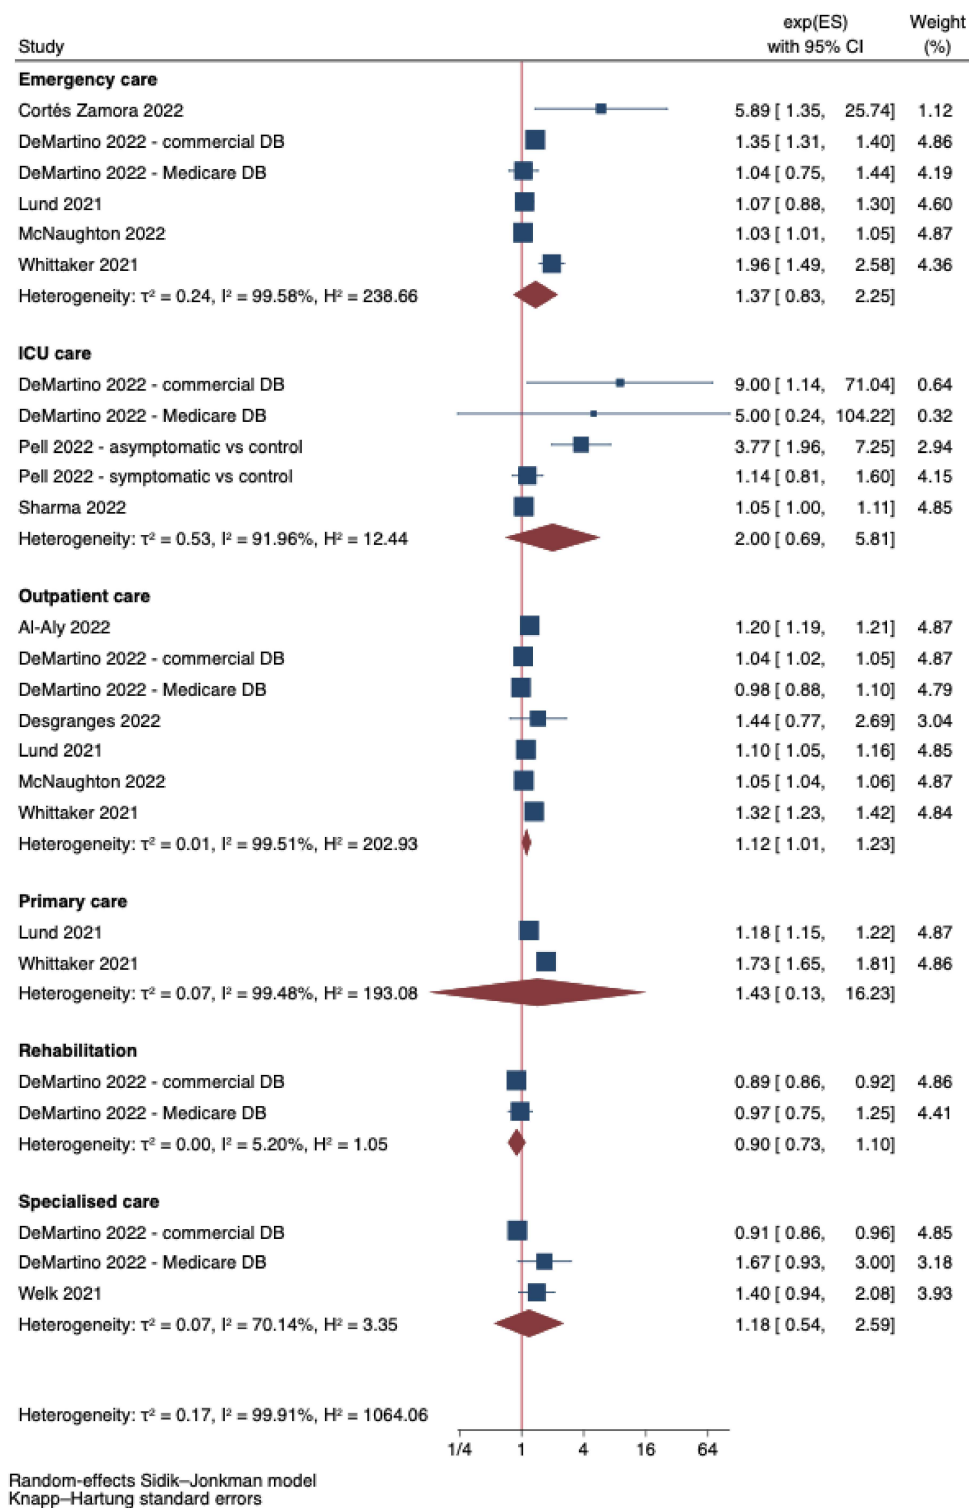

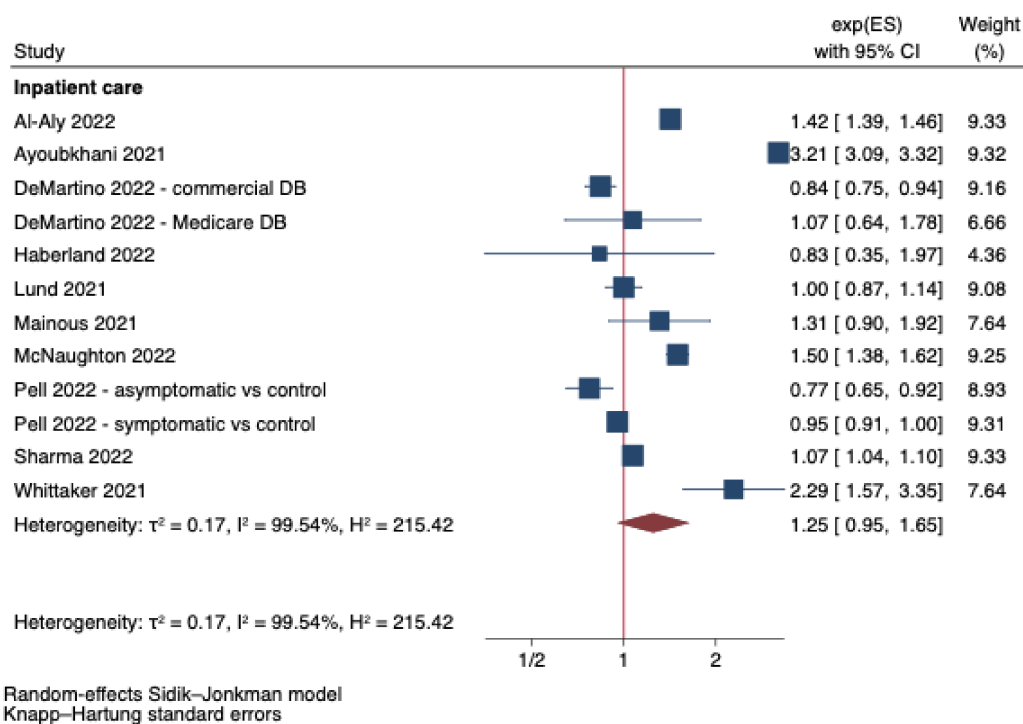

## Supplementary Table - Estimated rates of resource use in COVID and control groups.

| Outcome         | Median rate in the control group | Estimated rate in the Covid group |
|-----------------|----------------------------------|-----------------------------------|
| ICU care        | 0.09%                            | 0.17% (0.06% to 0.51%)            |
| Inpatient care  | 7.50%                            | 9.38% (7.13% to 12.38%)           |
| Emergency care  | 3.72%                            | 5.10% (3.09% to 8.37%)            |
| Outpatient care | 34.19%                           | 38.29% (34.53% to 42.05%)         |
| Primary care    | N/A                              | N/A                               |
| Specialist care | 0.97%                            | 1.14% (0.52% to 2.50%)            |
| Rehabilitation  | 5.96%                            | 5.36% (4.35% to 6.55%)            |

Note: Estimated rates were calculated from the estimates from meta-analyses

## Analysis: Incident use of new drugs

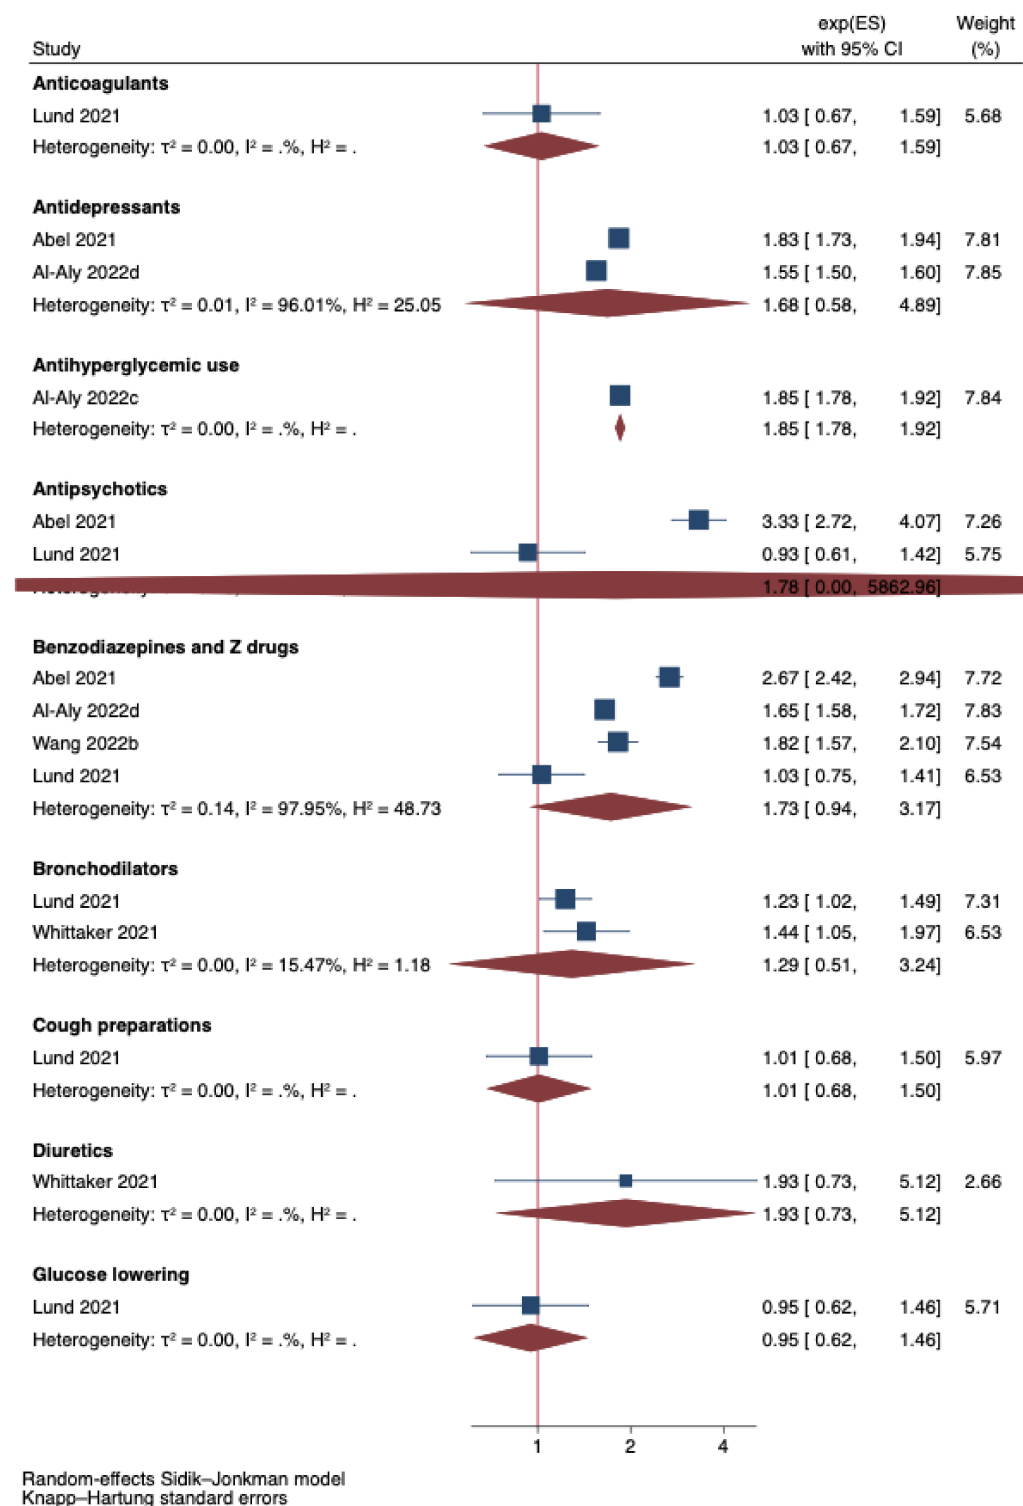

(cont.)

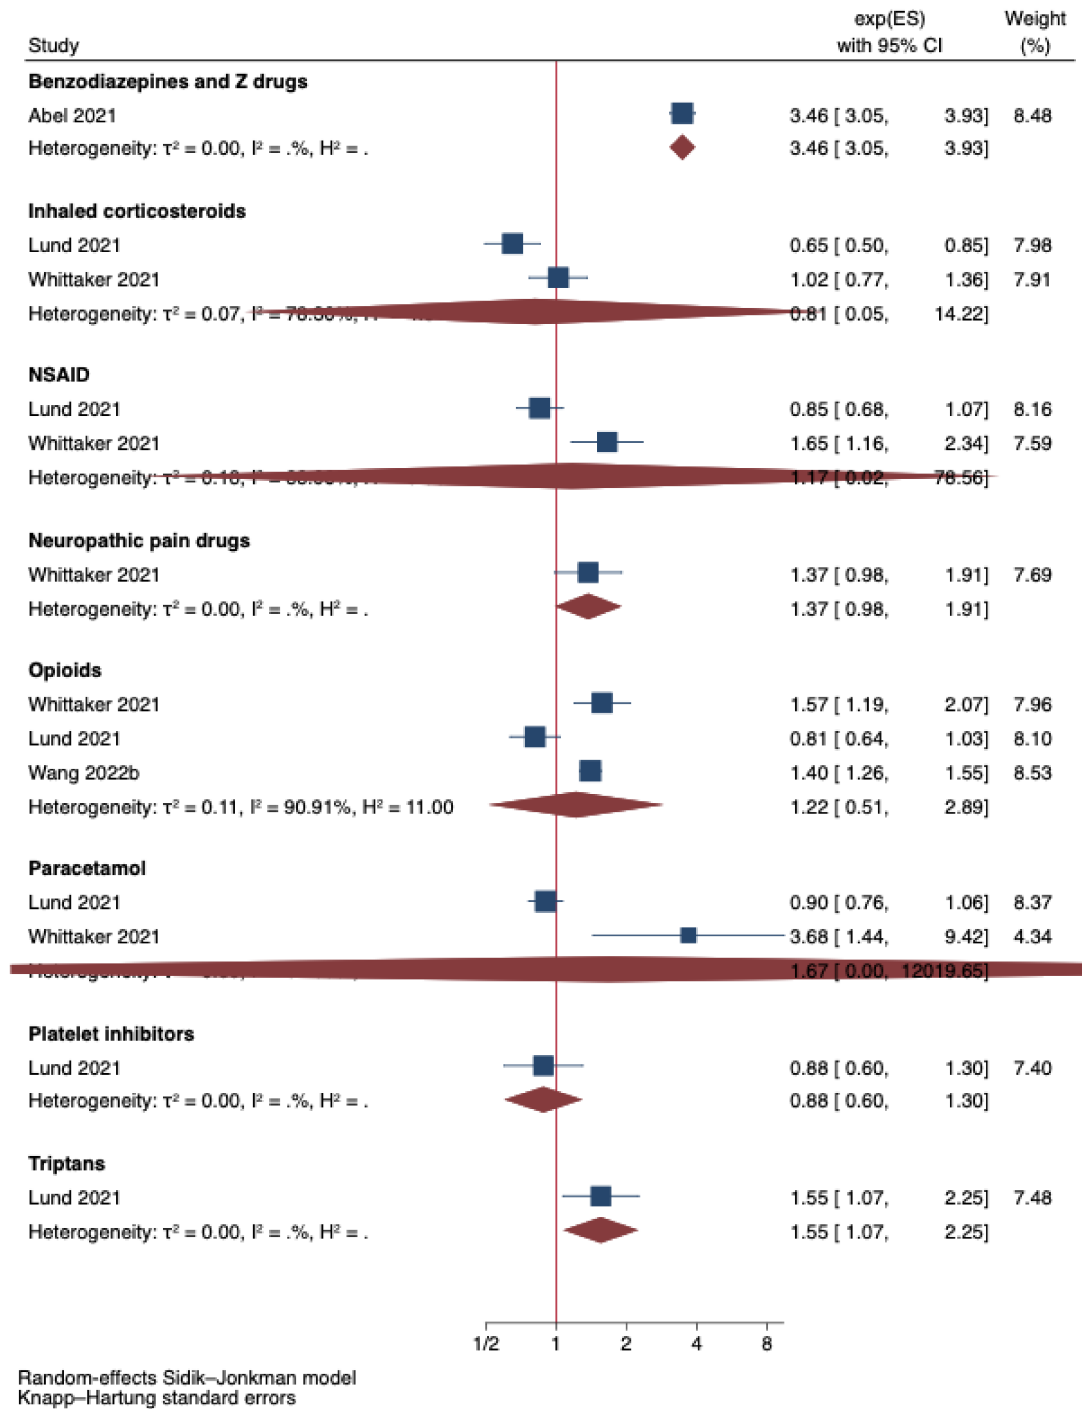

Supplement: bmjmed-2023-000723supp003.pdf [file bmjmed-2023-000723supp003.pdf]
