# Supplementary material for: Post-covid-19 conditions in adults: systematic review and meta-analysis of health outcomes in controlled studies
Source: PubMed Central journal article supplement — BMJ Med. 2024 Jan 29;3(1):e000723. doi: 10.1136/bmjmed-2023-000723 (PMC10826558; doi:10.1136/bmjmed-2023-000723), 2024-01-29
Supplement: bmjmed-2023-000723supp004.pdf [file bmjmed-2023-000723supp004.pdf]

## SUPPLEMENTARY MATERIAL 4: Post-Covid Conditions in Adults: a Systematic Review and Meta-analysis of controlled studies

### RECOVERY FROM SYMPTOMS

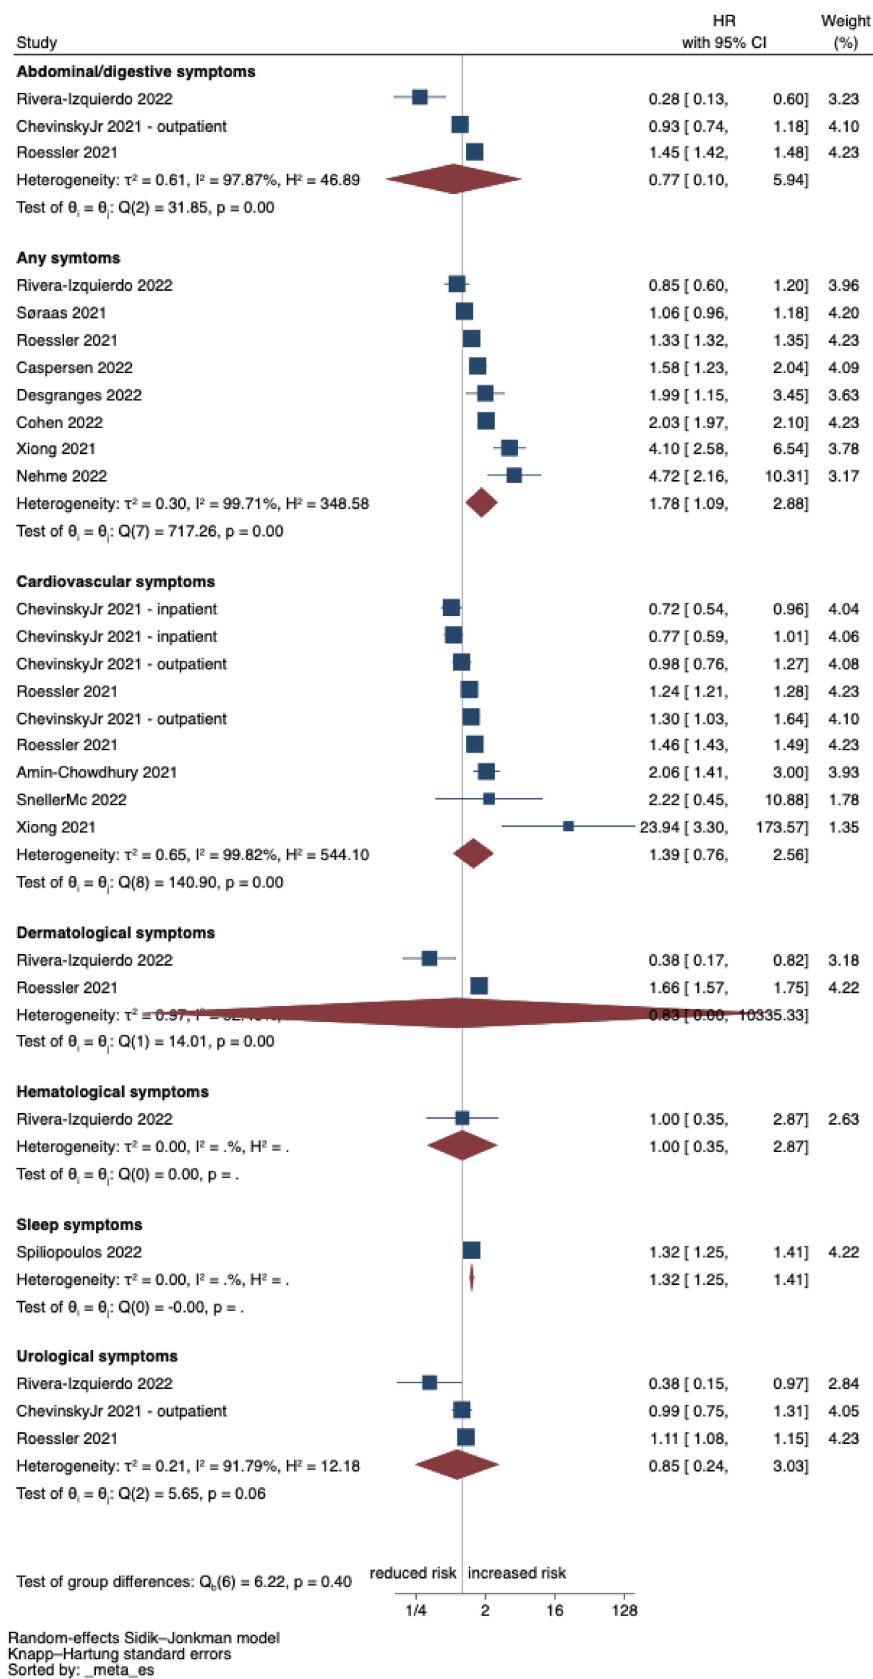

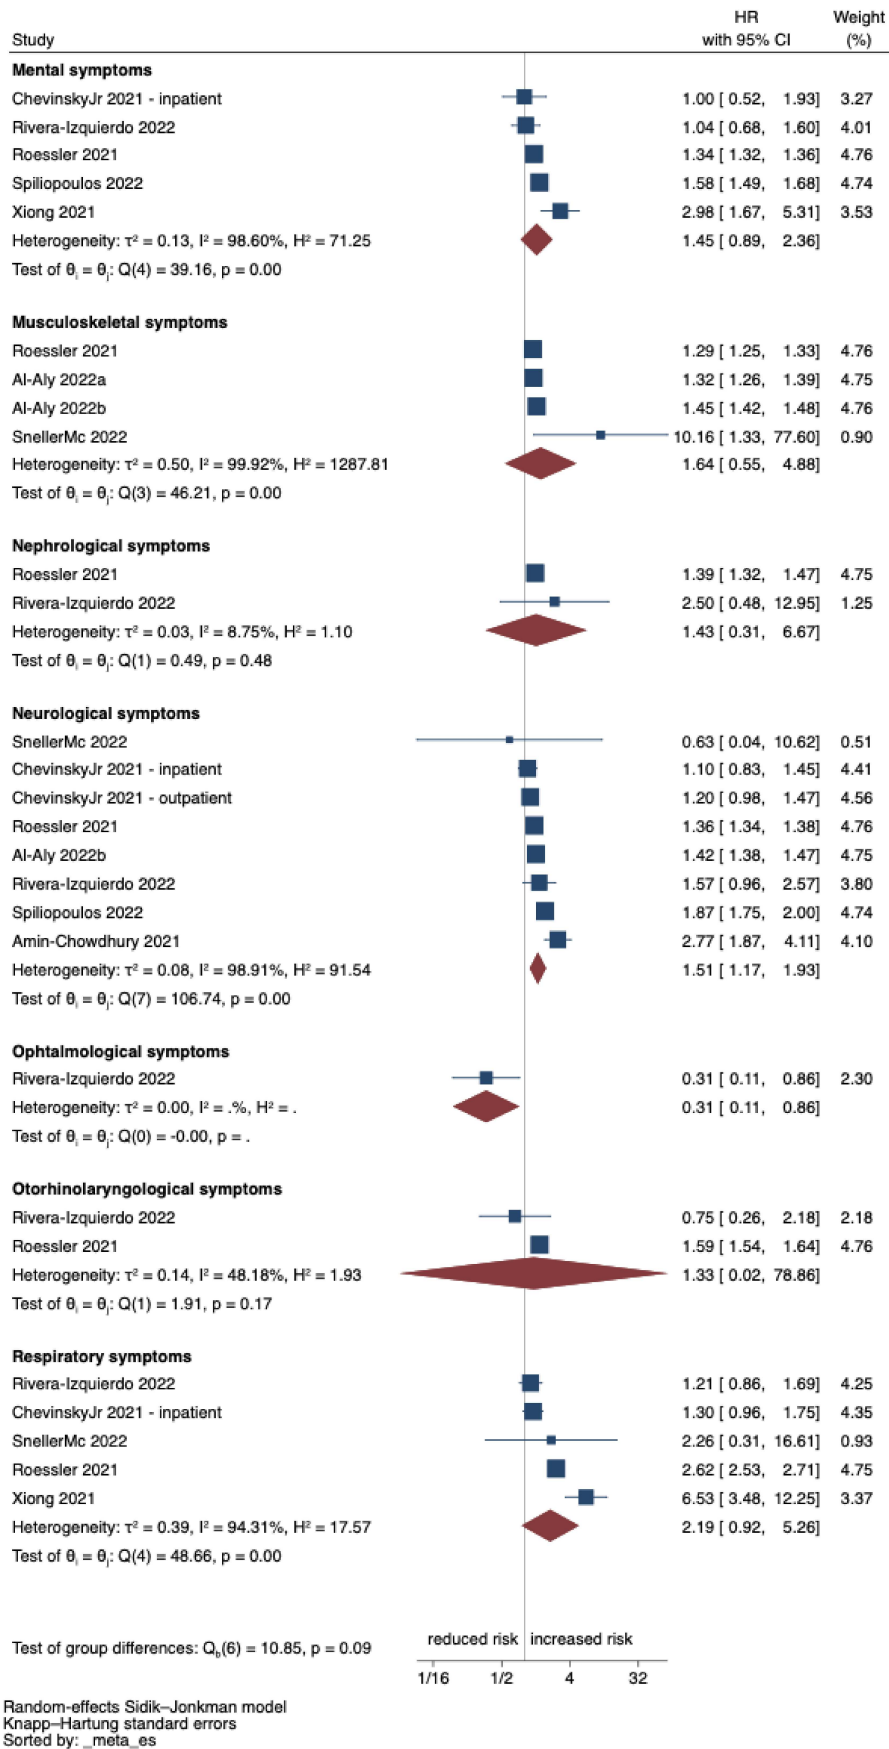

Random-effects Sidik-Jonkman model  
Knapp-Hartung standard errors  
Sorted by: \_meta\_es
