# Supplementary material for: Post-covid-19 conditions in adults: systematic review and meta-analysis of health outcomes in controlled studies
Source: PubMed Central journal article supplement — BMJ Med. 2024 Jan 29;3(1):e000723. doi: 10.1136/bmjmed-2023-000723 (PMC10826558; doi:10.1136/bmjmed-2023-000723), 2024-01-29
Supplement: bmjmed-2023-000723supp005.pdf [file bmjmed-2023-000723supp005.pdf]

## **SUPPLEMENTARY MATERIAL 5: Post-Covid Conditions in Adults: a Systematic Review and Meta-analysis of controlled studies**

### **Table of contents**

|                                                                                      |          |
|--------------------------------------------------------------------------------------|----------|
| <b>Analyses: Incident medical diagnosis stratified by number of core confounders</b> | <b>3</b> |
| Analysis 1.1. Incidence of Diabetes                                                  | 3        |
| Analysis 1.2. Incidence of Thyroid Disorders                                         | 5        |
| Analysis 2.1. Any Psychiatric Disorder                                               | 6        |
| Analysis 2.2. Mood Disorders                                                         | 7        |
| Analysis 2.3. Depressive Disorder                                                    | 8        |
| Analysis 2.4 Anxiety Disorder                                                        | 10       |
| Analysis 2.5. Panic Disorder                                                         | 12       |
| Analysis 2.6 Post-Traumatic Stress Disorder                                          | 13       |
| Analysis 2.7 Psychosis                                                               | 14       |
| Analysis 2.8 Any Substance Abuse Disorder                                            | 15       |
| Analysis 2.9 Alcohol Abuse Disorder                                                  | 16       |
| Analysis 3.1 Any cardiovascular disorder                                             | 17       |
| Analysis 3.2 Hypertension                                                            | 18       |
| Analysis 3.3 Pulmonary Hypertension                                                  | 19       |
| Analysis 3.4 Heart Failure                                                           | 20       |
| Analysis 3.5 Postural tachycardia syndrome (POTS)                                    | 22       |
| Analysis 3.6. Myocarditis                                                            | 23       |
| Analysis 3.7 Pericarditis                                                            | 24       |
| Analysis 3.8 Myocardial infarction                                                   | 25       |
| Analysis 3.9 Cardiogenic shock                                                       | 26       |
| Analysis 3.10 Cardiomyopathy                                                         | 27       |
| Analysis 3.11 Peripheral artery disease                                              | 28       |
| Analysis 3.12 Deep vein thrombosis                                                   | 29       |
| Analysis 3.13 Pulmonary embolism                                                     | 30       |
| Analysis 3.14 Ischemic stroke                                                        | 32       |
| Analysis 3.15 Hemorrhagic stroke                                                     | 33       |
| Analysis 3.16 Stroke (global)                                                        | 34       |
| Analysis 4.1 Sensory disorder                                                        | 35       |
| Analysis 4.2 Cognitive Impairment                                                    | 36       |
| Analysis 4.3. Dementia                                                               | 37       |
| Analysis 4.4 Alzheimer's Disease                                                     | 38       |
| Analysis 4.5 Extrapyrimalal and movement disorders                                   | 39       |
| Analysis 4.6 Sleep apnea                                                             | 40       |
| Analysis 4.7 Other sleep disorders                                                   | 41       |
| Analysis 4.8 Peripheral Neuropathy                                                   | 43       |
| Analysis 4.9 Epilepsy or seizures                                                    | 44       |
| Analysis 4.10 Guillain Barré syndrome                                                | 45       |

|                                                                                                                              |           |
|------------------------------------------------------------------------------------------------------------------------------|-----------|
| Analysis 4.11 Headaches and Migraines                                                                                        | 46        |
| Analysis 5.1 Acute kidney injury                                                                                             | 47        |
| Analysis 5.2 Chronic kidney disease                                                                                          | 49        |
| Analysis 5.3 Fluid and electrolyte disorders                                                                                 | 50        |
| Analysis 6.1 Liver disorders                                                                                                 | 51        |
| Analysis 7.1 Lung disorders (general)                                                                                        | 52        |
| Analysis 7.2 Acute respiratory disorder                                                                                      | 53        |
| Analysis 7.3 Chronic respiratory failure                                                                                     | 54        |
| Analysis 7.4 Respiratory failure (unspecified)                                                                               | 55        |
| Meta-regression and testing for publication are not possible (<10 studies per variable).<br>All studies were fully adjusted. | 55        |
| Analysis 8.1 Coagulation disorders                                                                                           | 56        |
| Analysis 8.2 Anemia                                                                                                          | 57        |
| Analysis 8.3 Urticaria                                                                                                       | 58        |
| Analysis 8.4 Atopic dermatitis                                                                                               | 59        |
| Analysis 9. Other diagnosis (no meta-analysis)                                                                               | 60        |
| <b>Supplementary table. Estimated rates of incident diagnosis in covid and control groups.</b>                               | <b>63</b> |

# Analyses: Incident medical diagnosis stratified by number of core confounders

## Analysis 1.1. Incidence of Diabetes

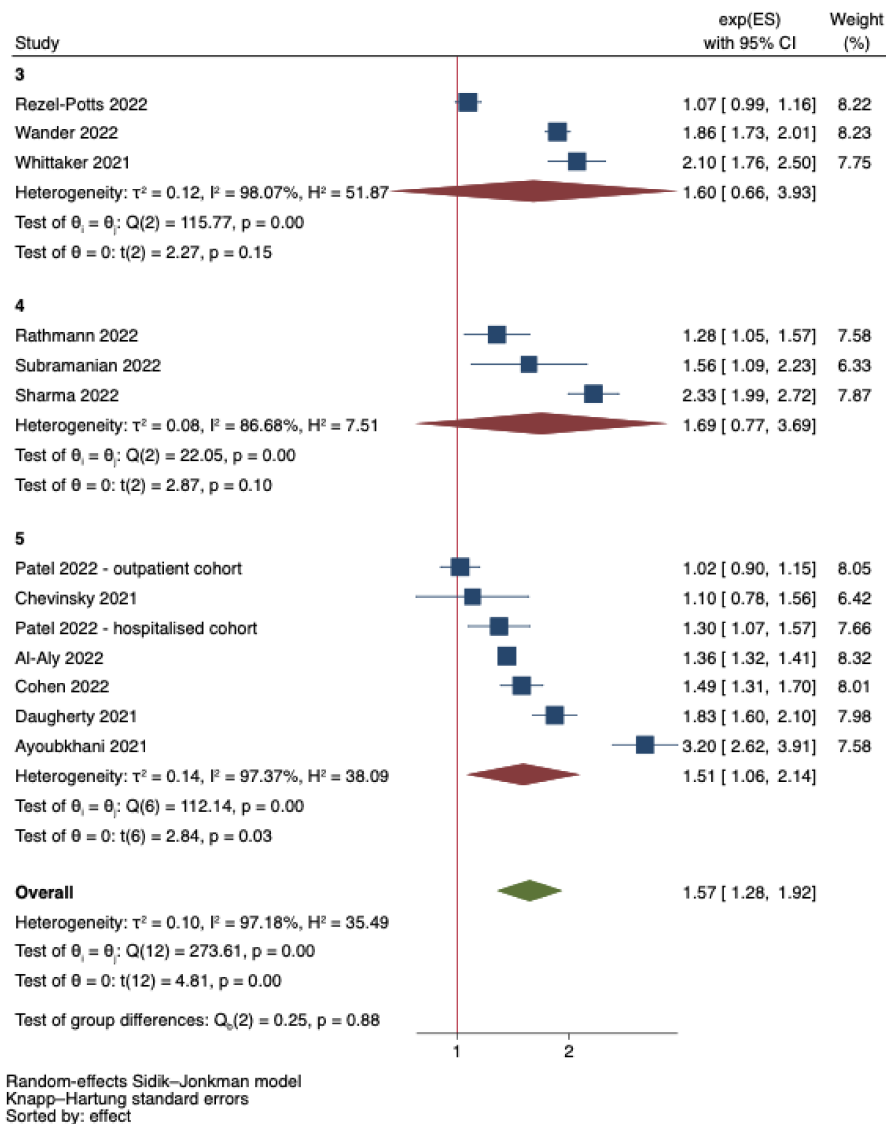

Meta-regression and testing for publication are not possible (<10 studies per variable). As there is little variation in effect estimates of the most adjusted group with the overall estimate, we used the overall estimate in the main manuscript.

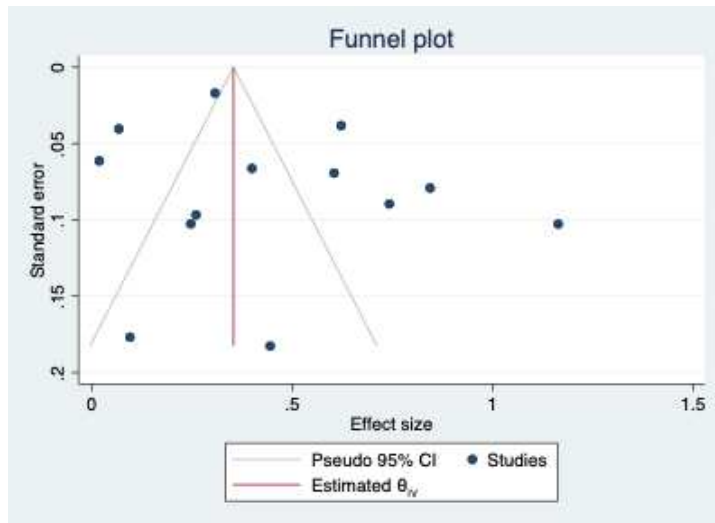**Publication bias (Egger)**H0:  $\beta_{e1} = 0$ ; no small-study effects $\beta_{e1} = 0.26$ SE of  $\beta_{e1} = 2.153$  $z = 0.12$ Prob  $> |z| = 0.9049$

## Analysis 1.2. Incidence of Thyroid Disorders

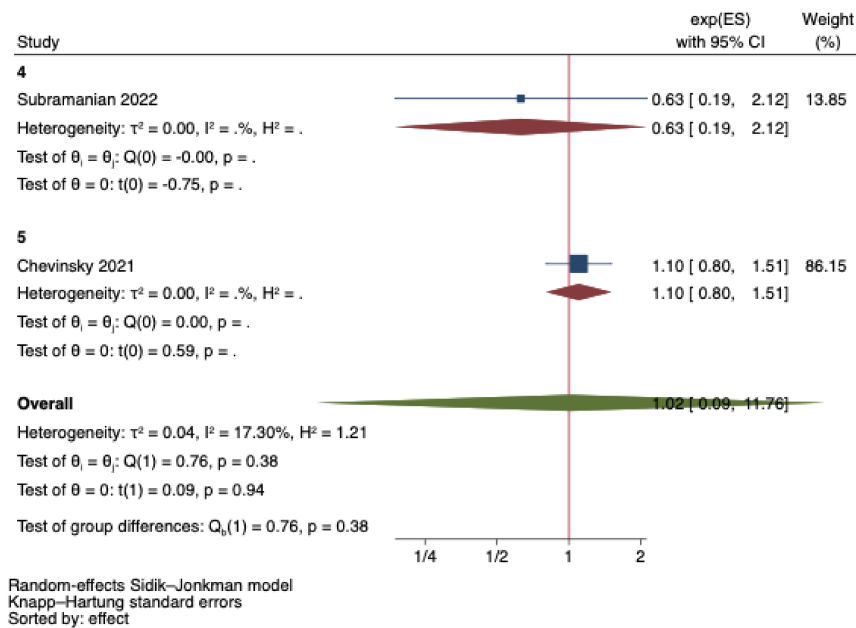

Meta-regression and testing for publication are not possible (<10 studies per variable). As there is little variation in effect estimates of the most adjusted group with the overall estimate, we used the overall estimate in the main manuscript.

## Analysis 2.1. Any Psychiatric Disorder

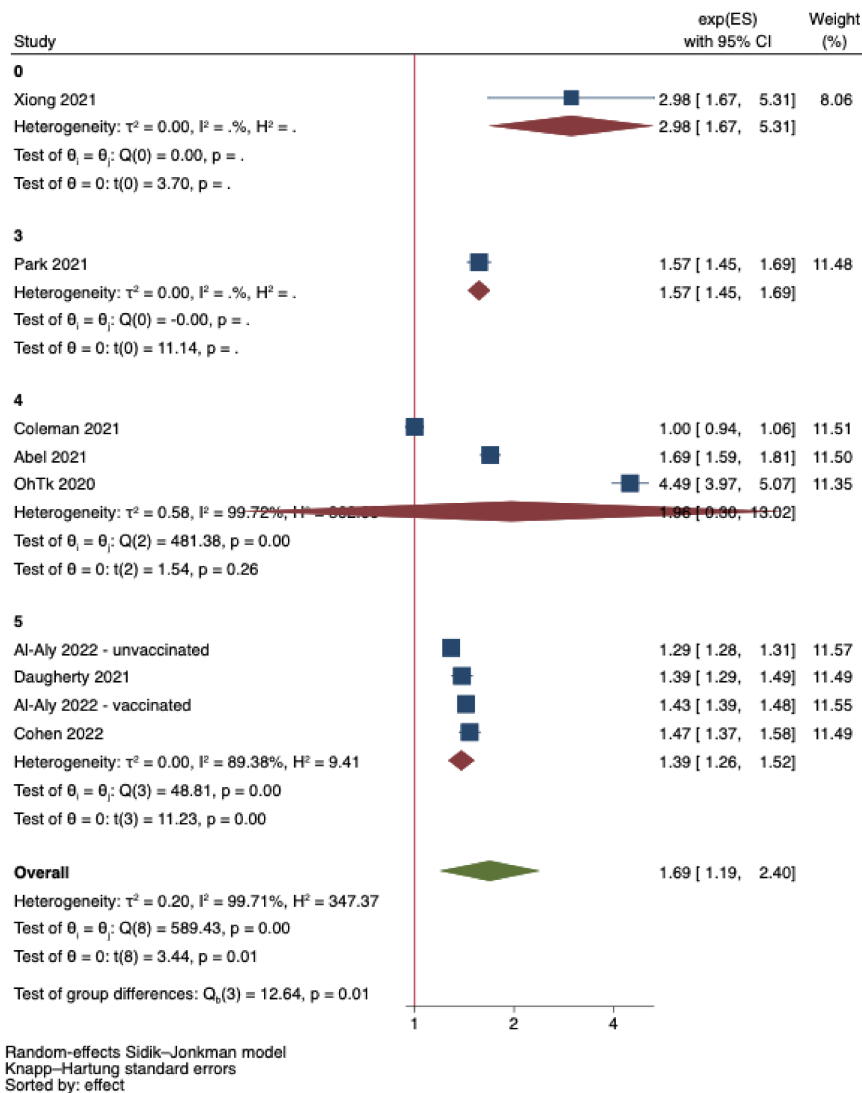

Meta-regression and testing for publication are not possible (<10 studies per variable). We used the most adjusted estimate in the manuscript.

## Analysis 2.2. Mood Disorders

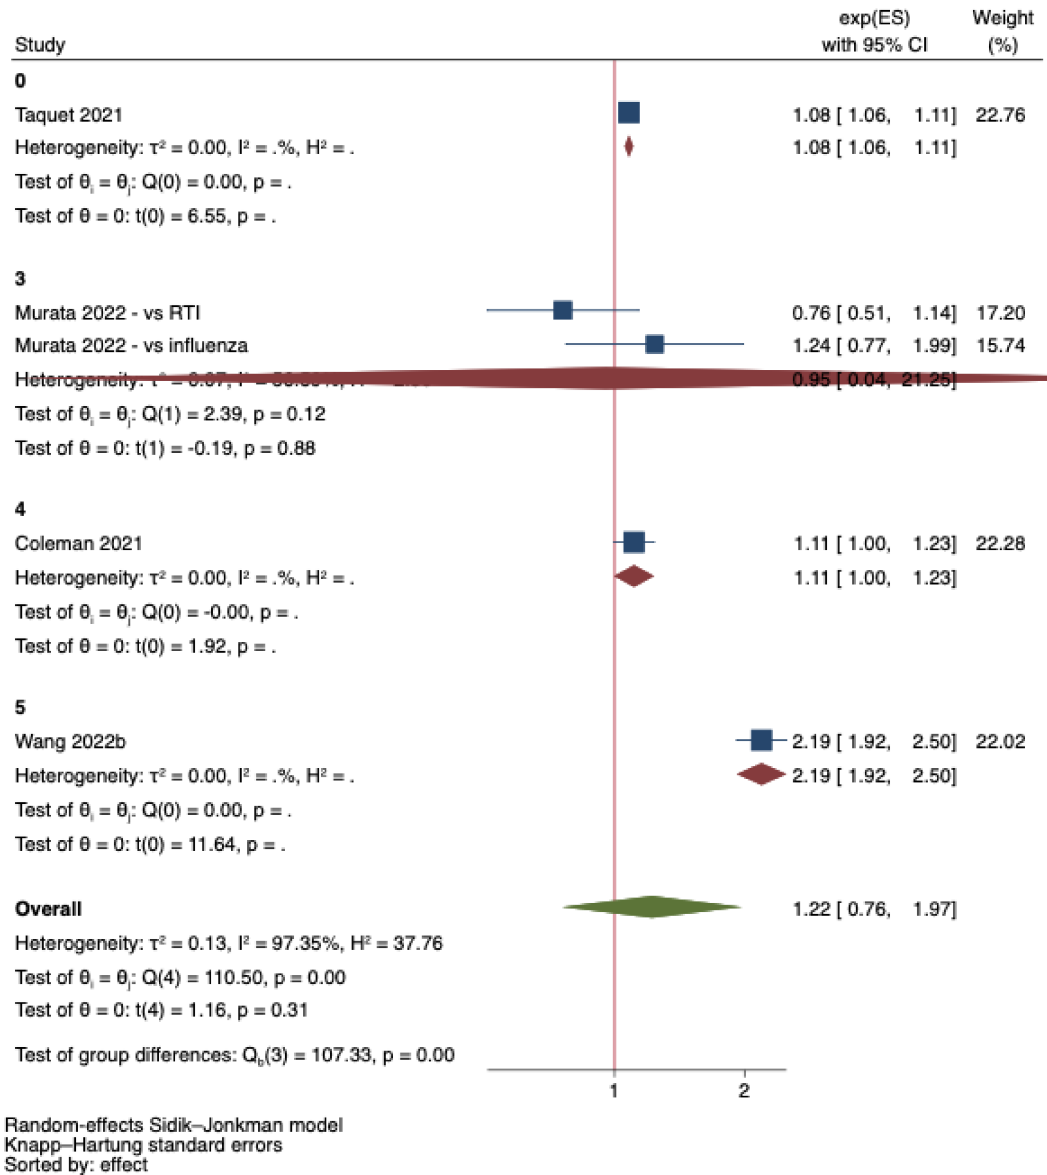

Meta-regression and testing for publication are not possible (<10 studies per variable). We used the most adjusted estimate in the manuscript.

## Analysis 2.3. Depressive Disorder

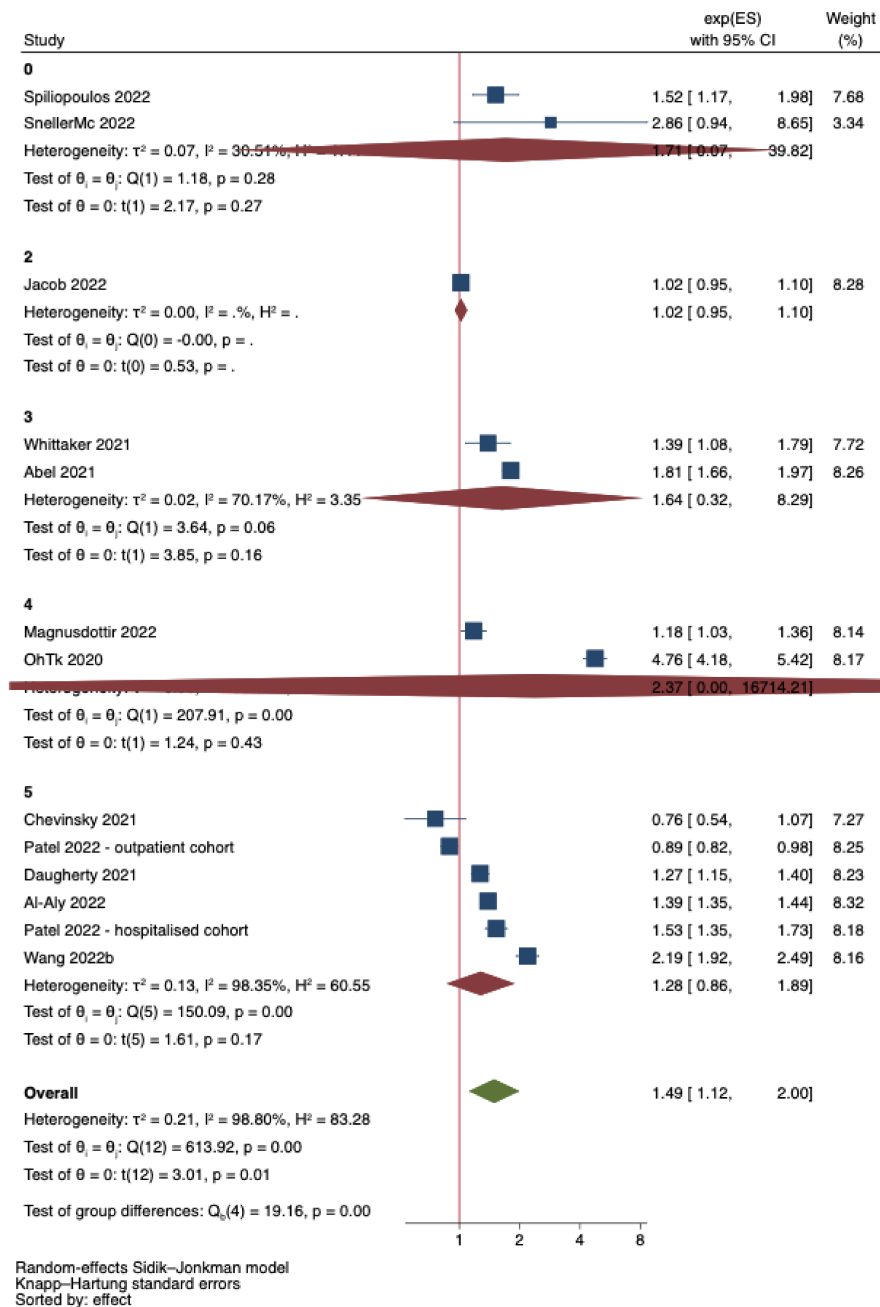

Meta-regression and testing for publication are not possible (<10 studies per variable). As there is little variation in effect estimates of the most adjusted group with the overall estimate, we used the overall estimate in the main manuscript.



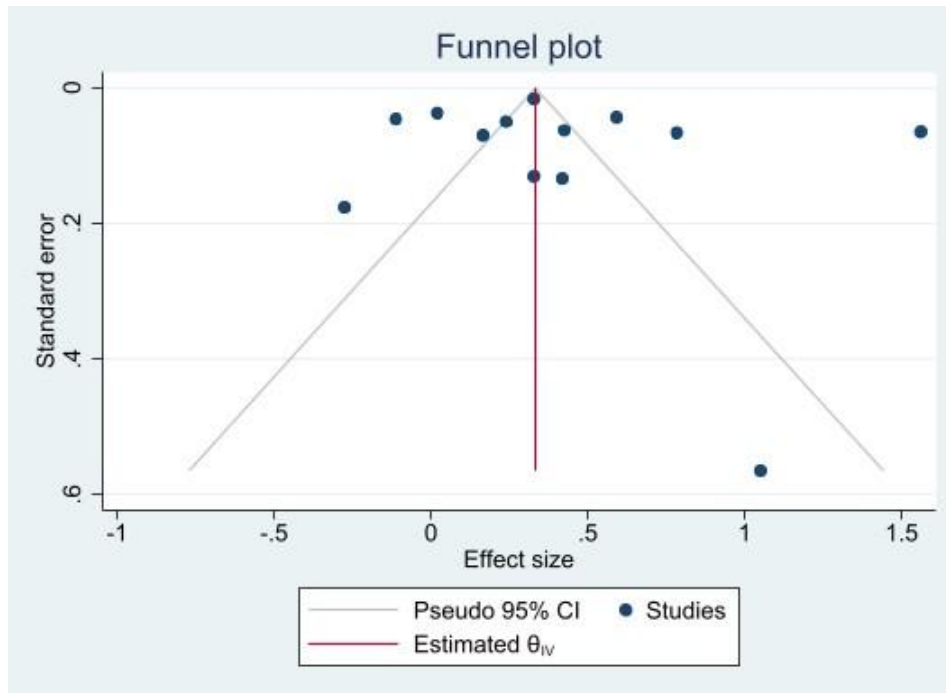**Publication bias (Egger)**H0:  $\beta_{e1} = 0$ ; no small-study effects $\beta_{e1} = 0.73$ SE of  $\beta_{e1} = 1.380$  $z = 0.53$ Prob >  $|z| = 0.5980$

## Analysis 2.4 Anxiety Disorder

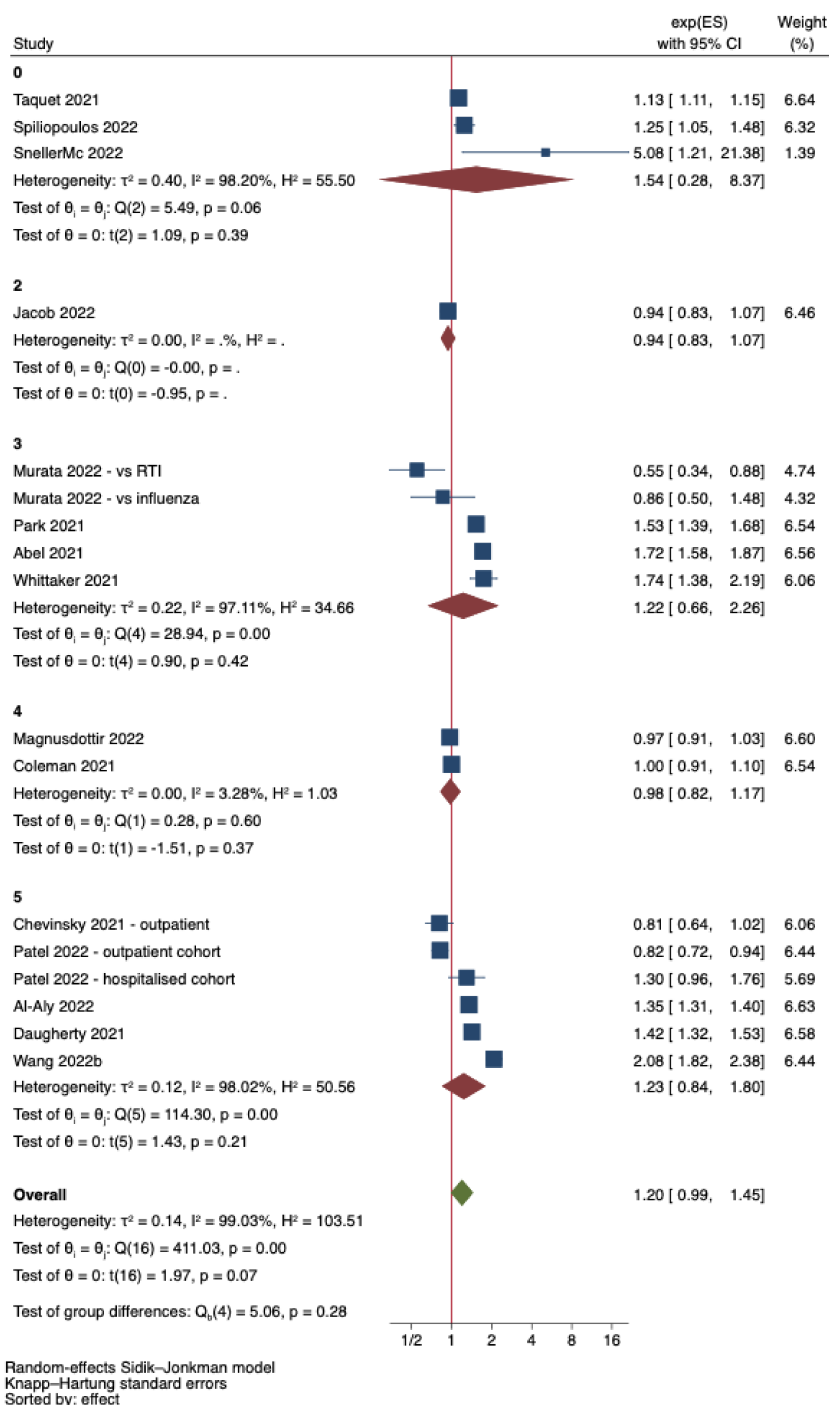

Meta-regression and testing for publication are not possible (<10 studies per variable). As there is little variation in effect estimates of the most adjusted group with the overall estimate, we used the overall estimate in the main manuscript.

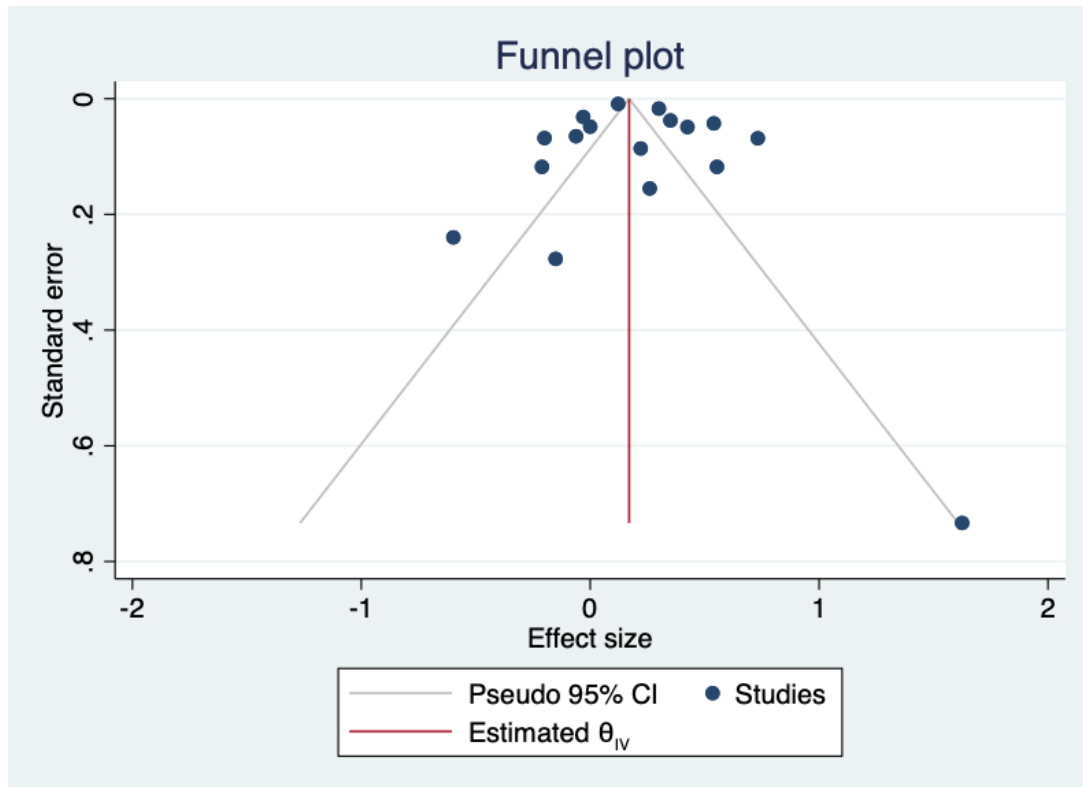**Publication bias (Egger)**H0:  $\beta_{11} = 0$ ; no small-study effects

$\beta_{11} = 0.39$   
SE of  $\beta_{11} = 0.964$   
 $z = 0.40$   
Prob >  $|z| = 0.6870$

## Analysis 2.5. Panic Disorder

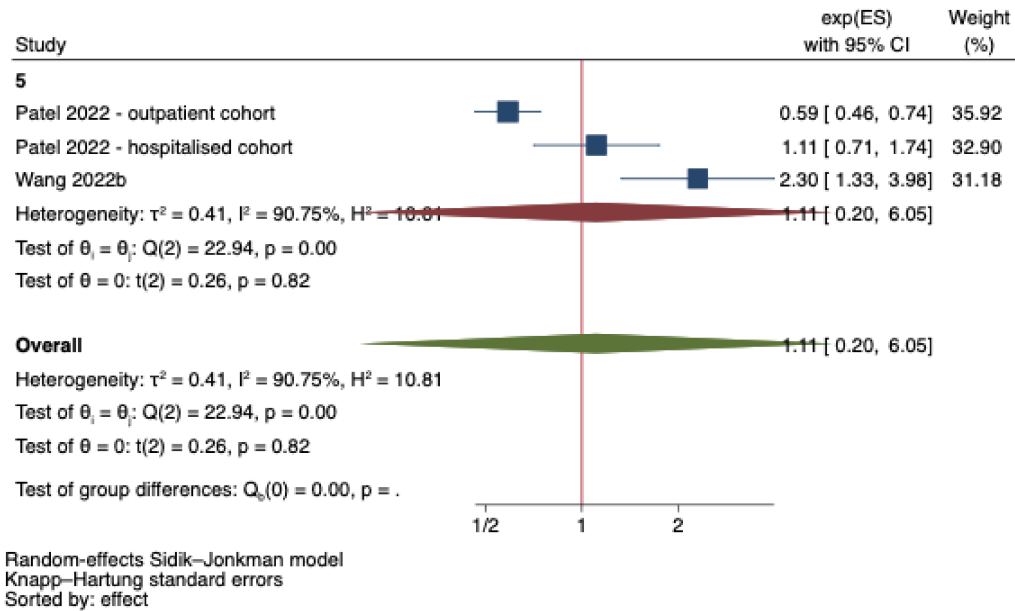

Meta-regression and testing for publication are not possible (<10 studies per variable). All studies were fully adjusted.

## Analysis 2.6 Post-Traumatic Stress Disorder

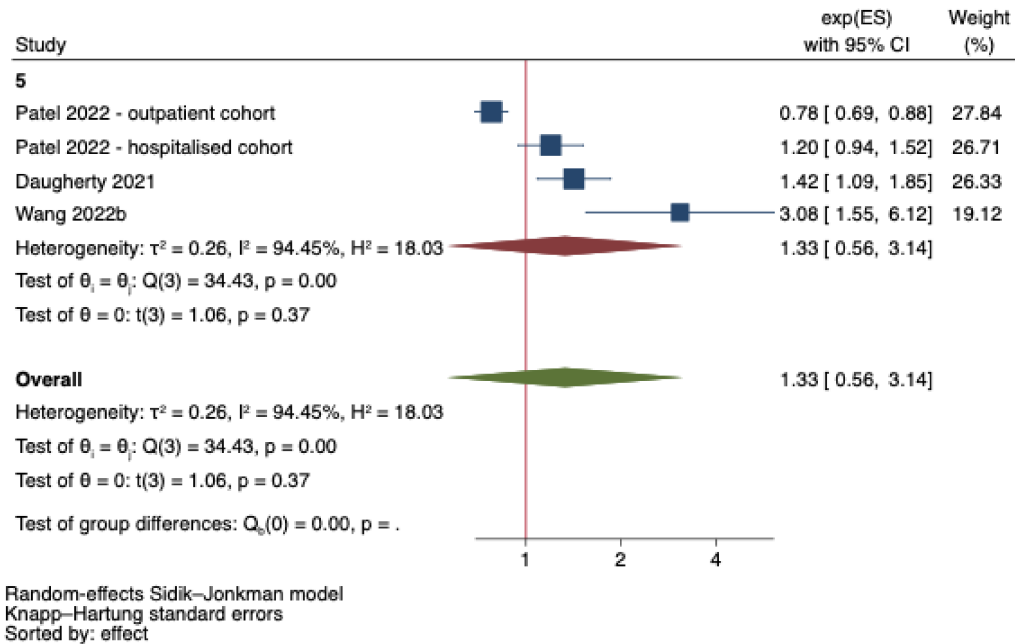

Meta-regression and testing for publication are not possible (<10 studies per variable). All studies were fully adjusted.

## Analysis 2.7 Psychosis

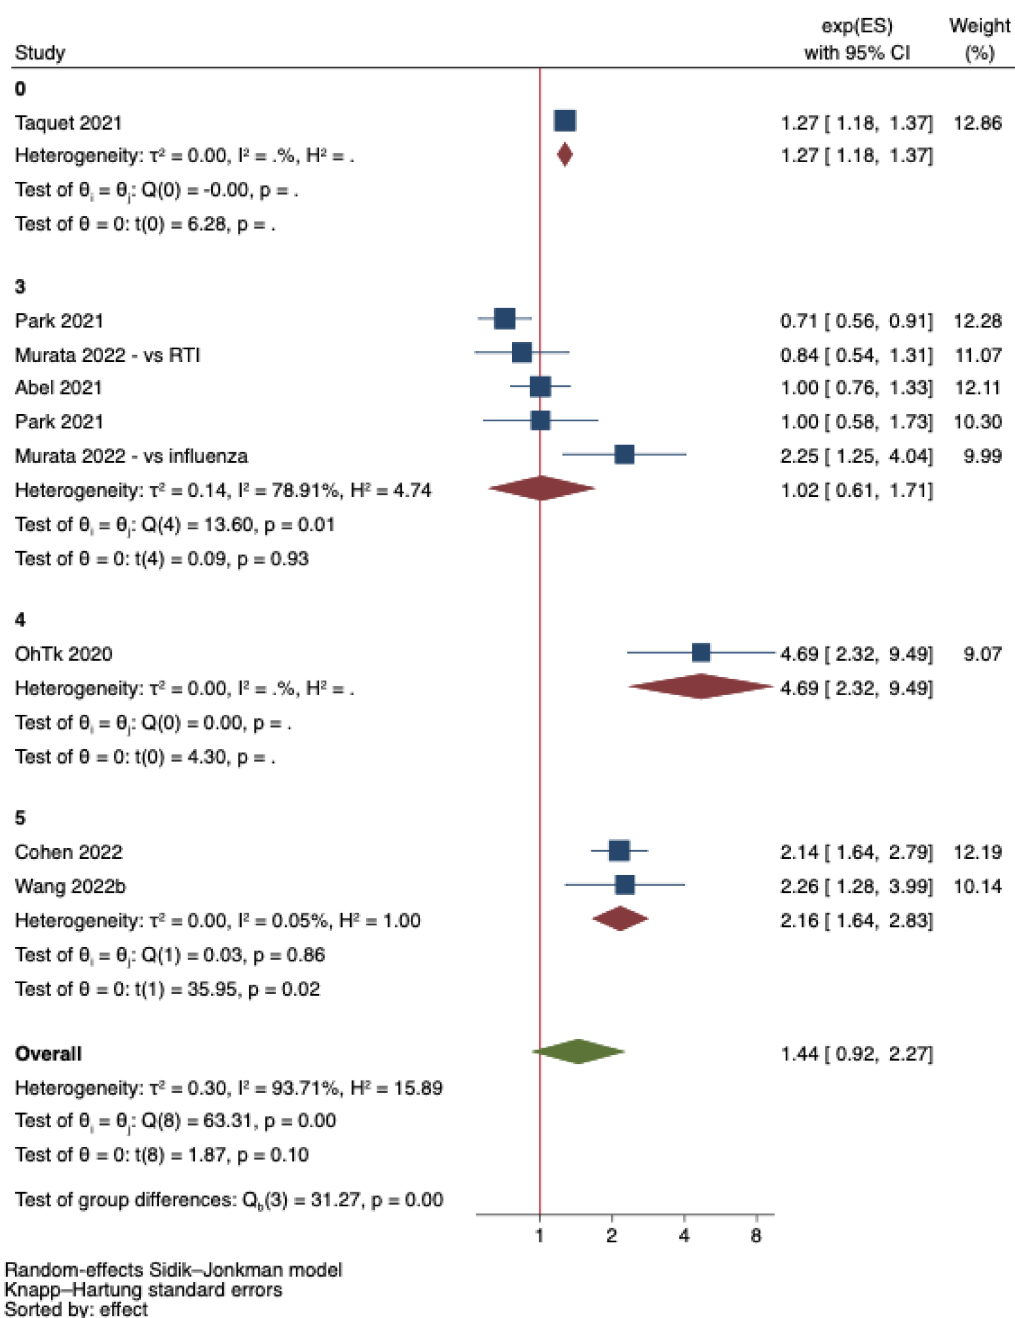

Meta-regression and testing for publication are not possible (<10 studies per variable). We used the most adjusted estimate in the manuscript.

## Analysis 2.8 Any Substance Abuse Disorder

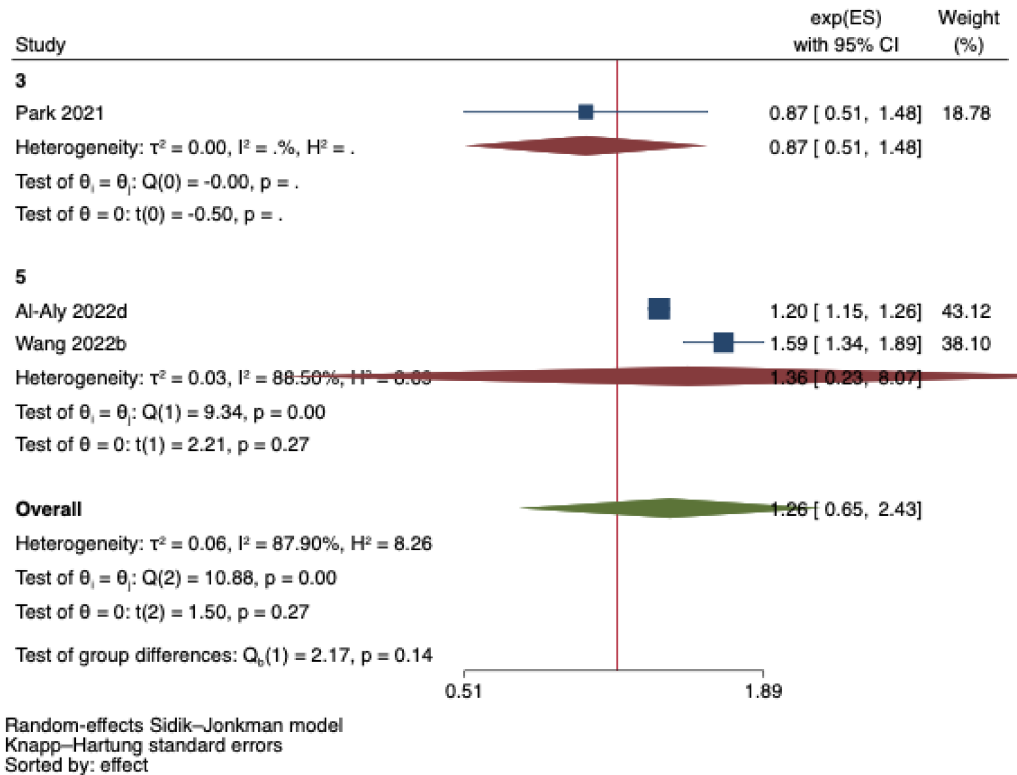

Meta-regression and testing for publication are not possible (<10 studies per variable). As there is little variation in effect estimates of the most adjusted group with the overall estimate, we used the overall estimate in the main manuscript.

## Analysis 2.9 Alcohol Abuse Disorder

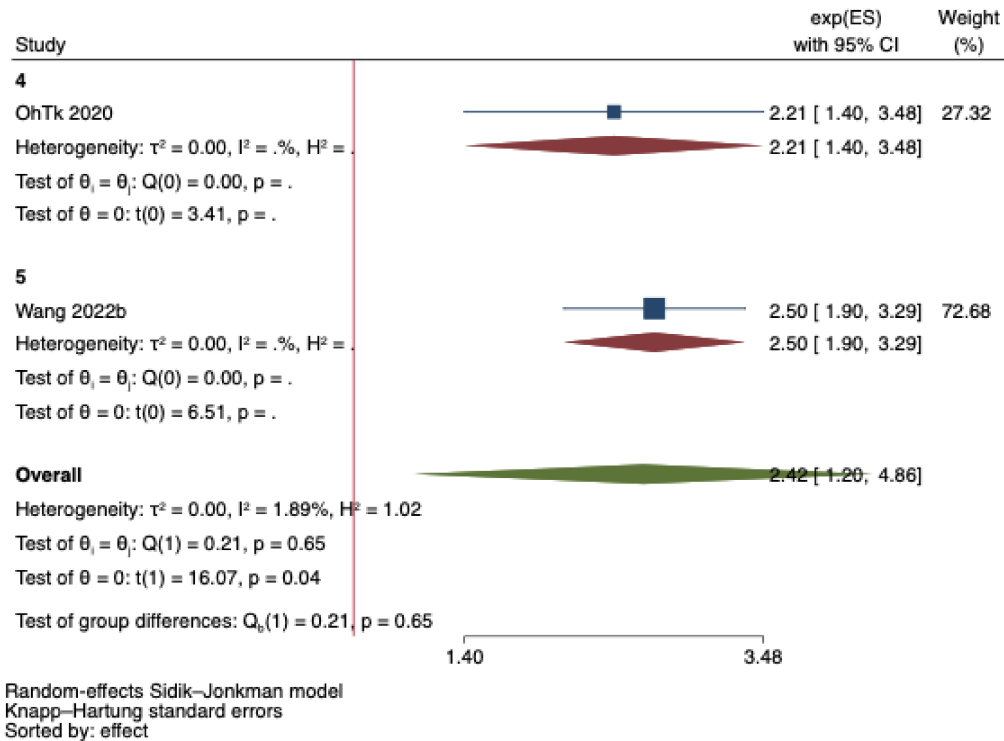

Meta-regression and testing for publication are not possible (<10 studies per variable). As there is little variation in effect estimates of the most adjusted group with the overall estimate, we used the overall estimate in the main manuscript.



## Analysis 3.1 Any cardiovascular disorder

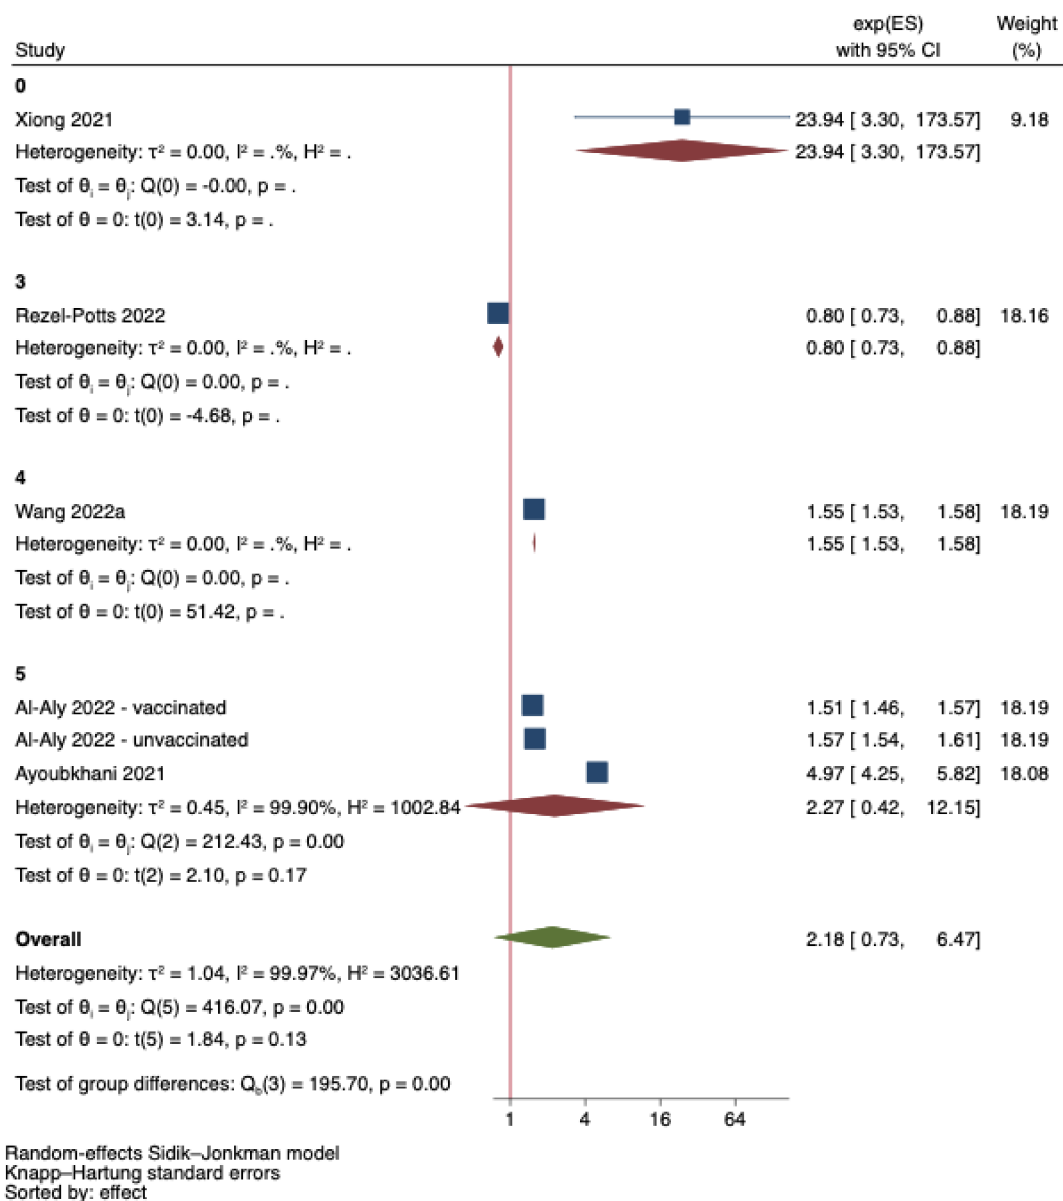

Meta-regression and testing for publication are not possible (<10 studies per variable). As there is little variation in effect estimates of the most adjusted group with the overall estimate, we used the overall estimate in the main manuscript.

## Analysis 3.2 Hypertension

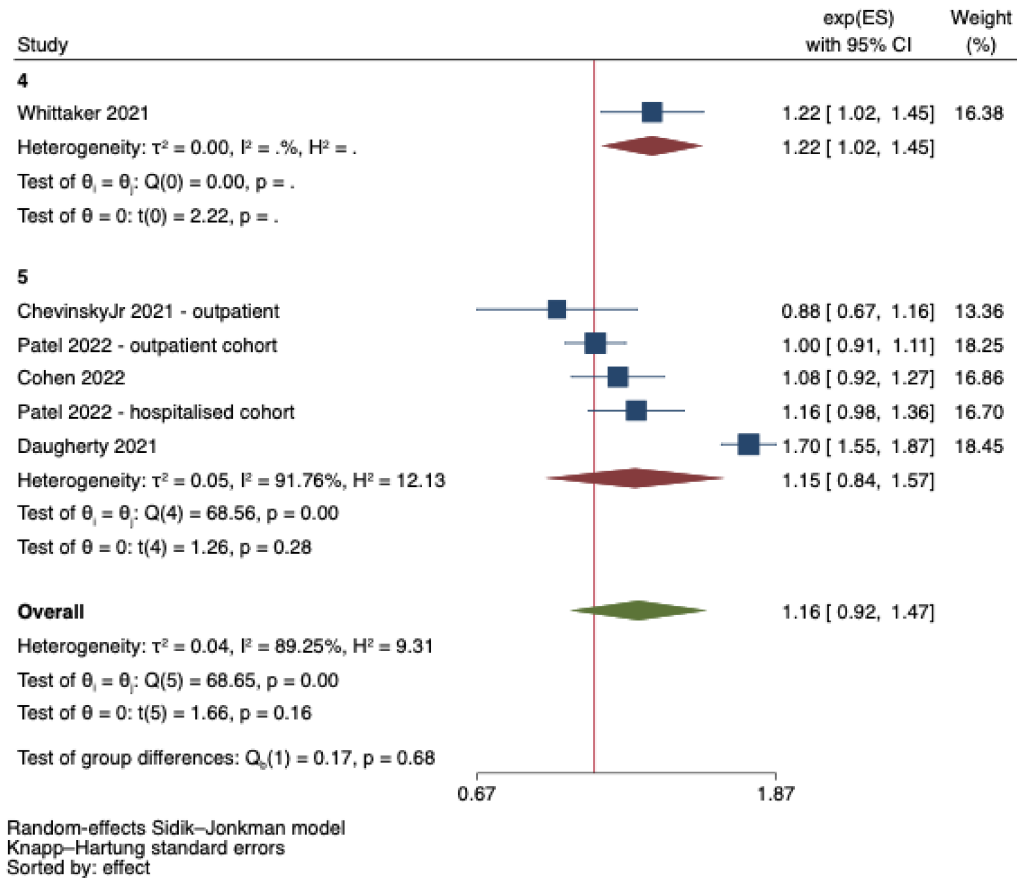

Meta-regression and testing for publication are not possible (<10 studies per variable). As there is little variation in effect estimates of the most adjusted group with the overall estimate, we used the overall estimate in the main manuscript.

## Analysis 3.3 Pulmonary Hypertension

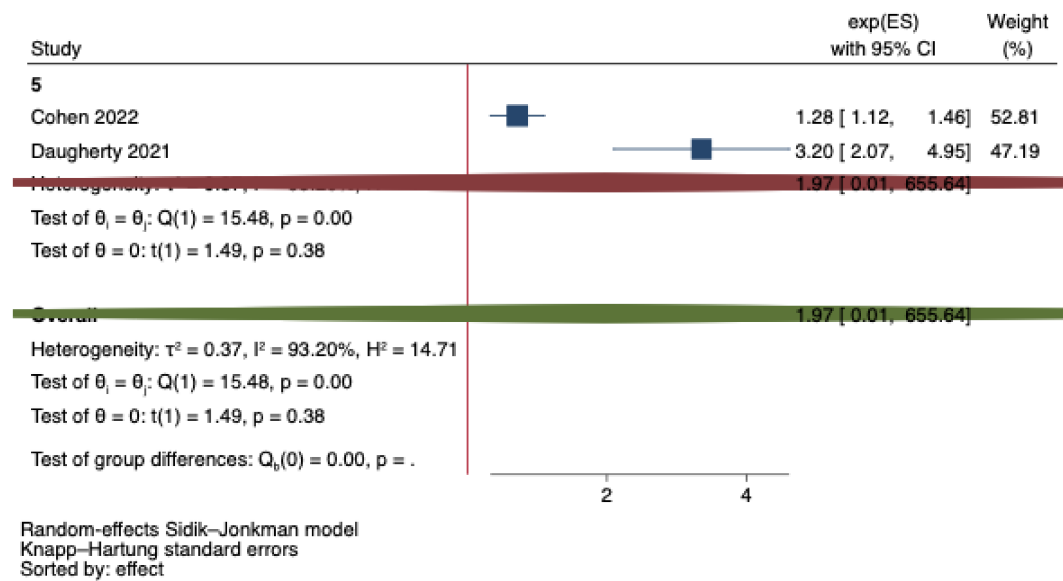

Meta-regression and testing for publication are not possible (<10 studies per variable). All studies were fully adjusted.

## Analysis 3.4 Heart Failure

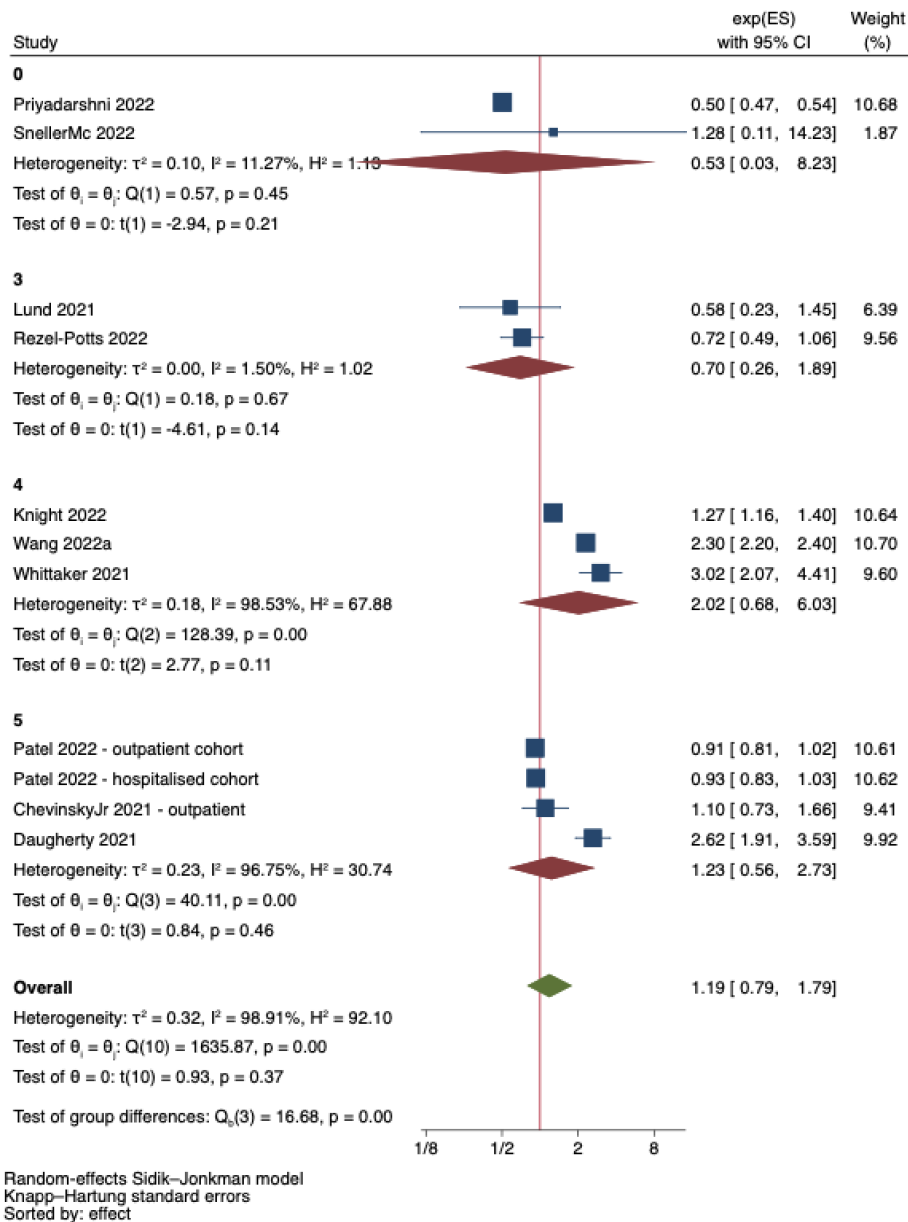

Meta-regression and testing for publication are not possible (<10 studies per variable). As there is little variation in effect estimates of the most adjusted group with the overall estimate, we used the overall estimate in the main manuscript.

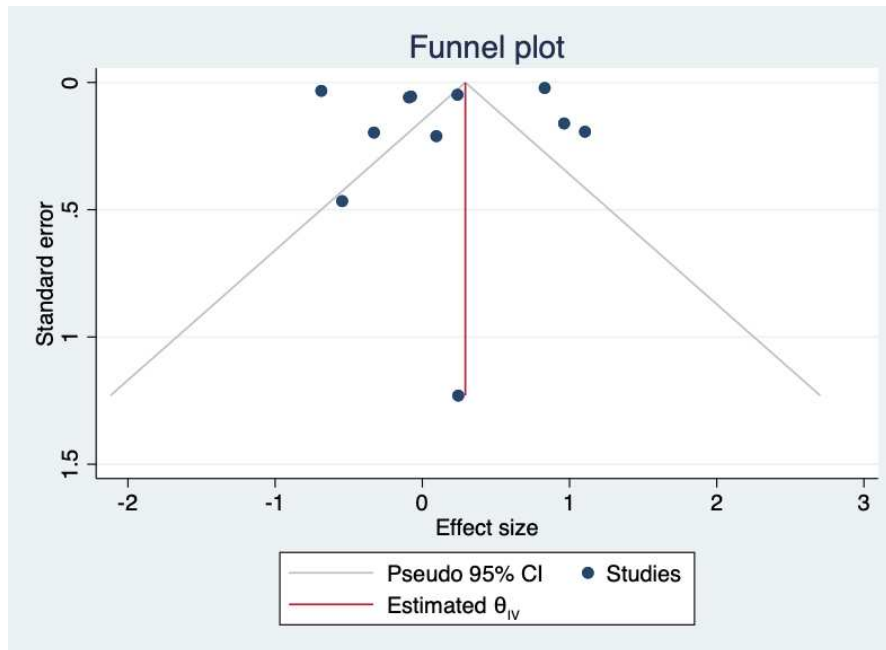**Publication bias (Egger)**H0:  $\beta_{e1} = 0$ ; no small-study effects $\beta_{e1} = -0.14$ SE of  $\beta_{e1} = 1.010$  $z = -0.14$ Prob  $> |z| = 0.8870$

## Analysis 3.5 Postural tachycardia syndrome (POTS)

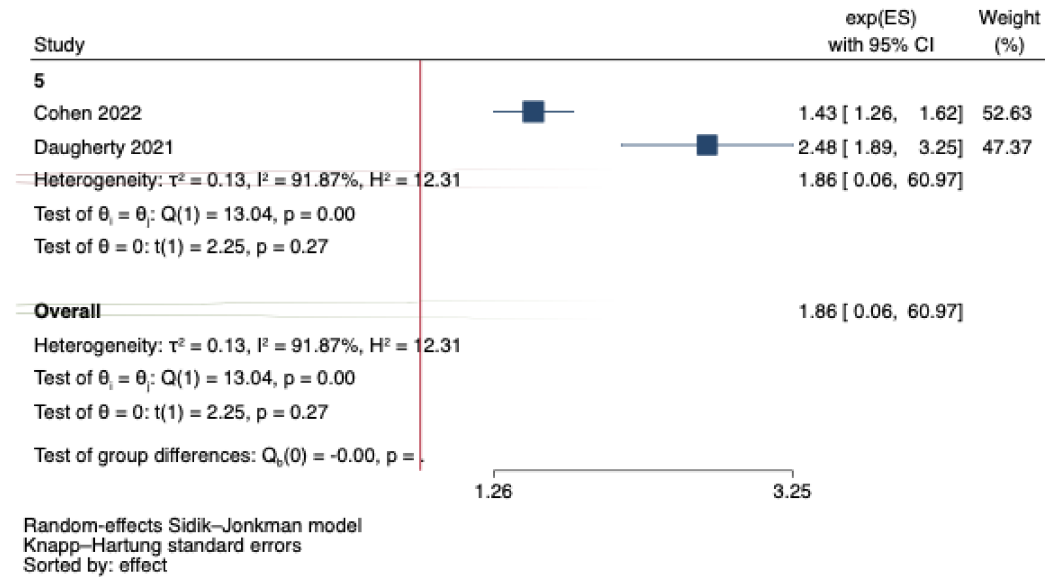

Meta-regression and testing for publication are not possible (<10 studies per variable). All studies were fully adjusted.

## Analysis 3.6. Myocarditis

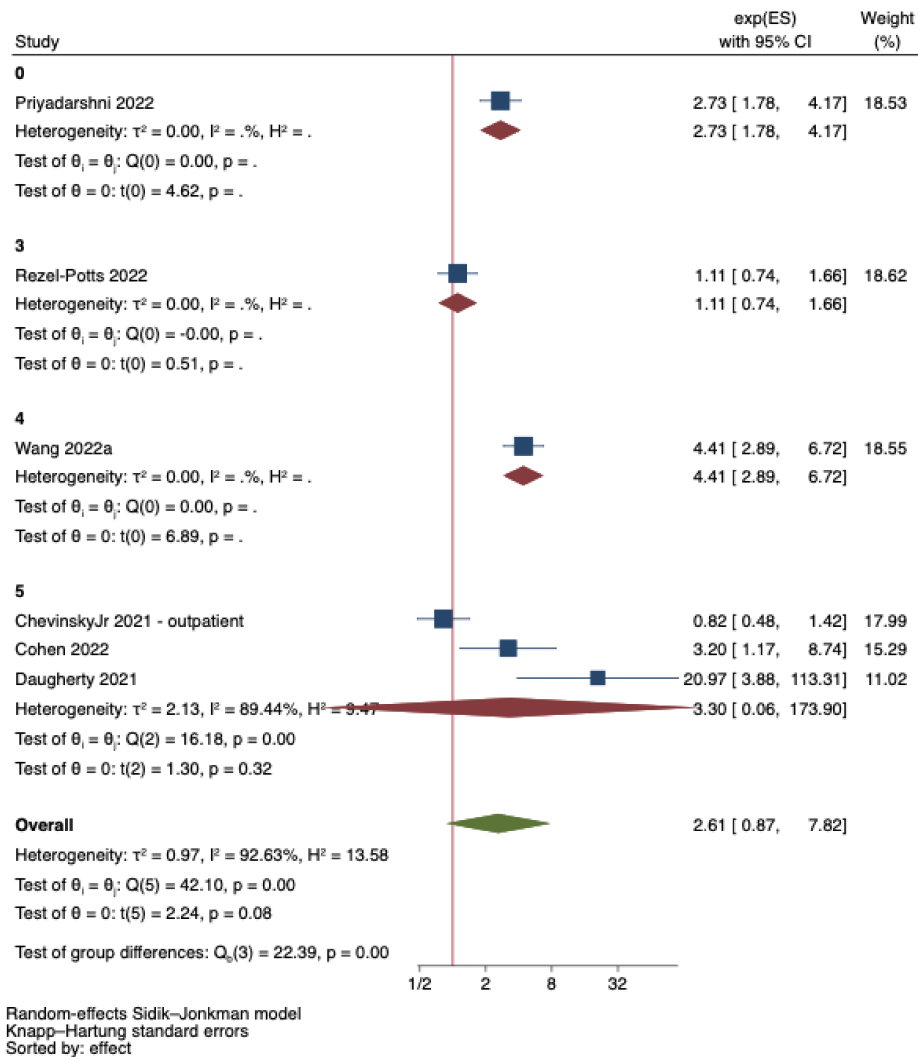

Meta-regression and testing for publication are not possible (<10 studies per variable). We used the most adjusted estimate in the manuscript.

## Analysis 3.7 Pericarditis

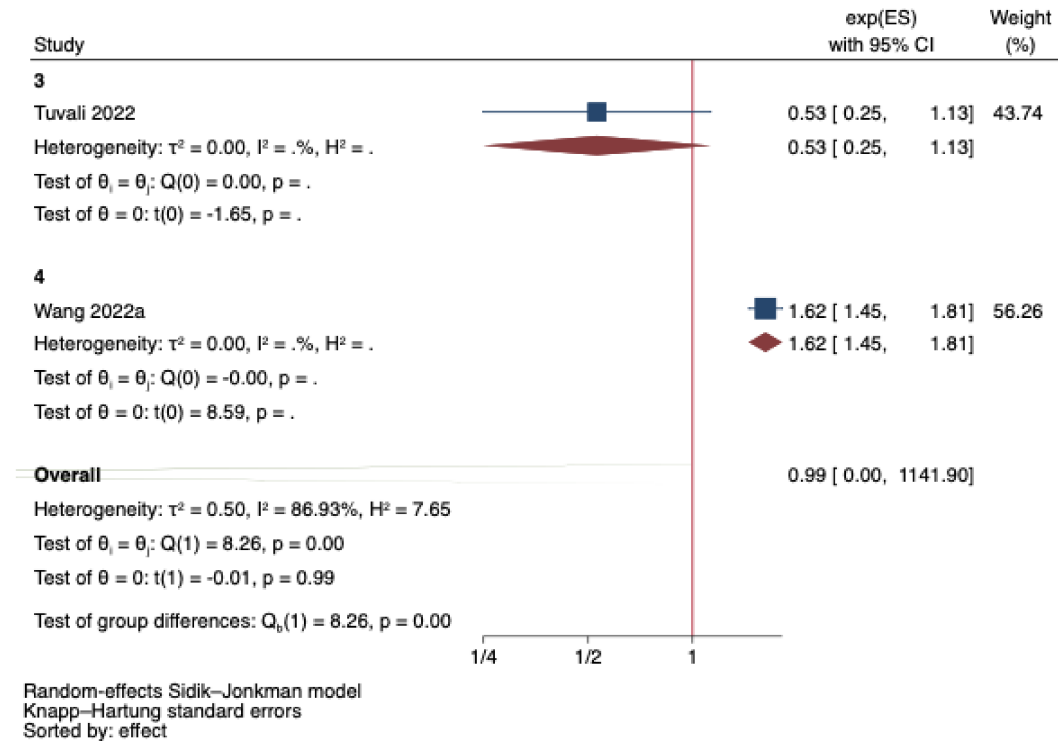

Meta-regression and testing for publication are not possible (<10 studies per variable). We used the most adjusted estimate in the manuscript.



## Analysis 3.8 Myocardial infarction

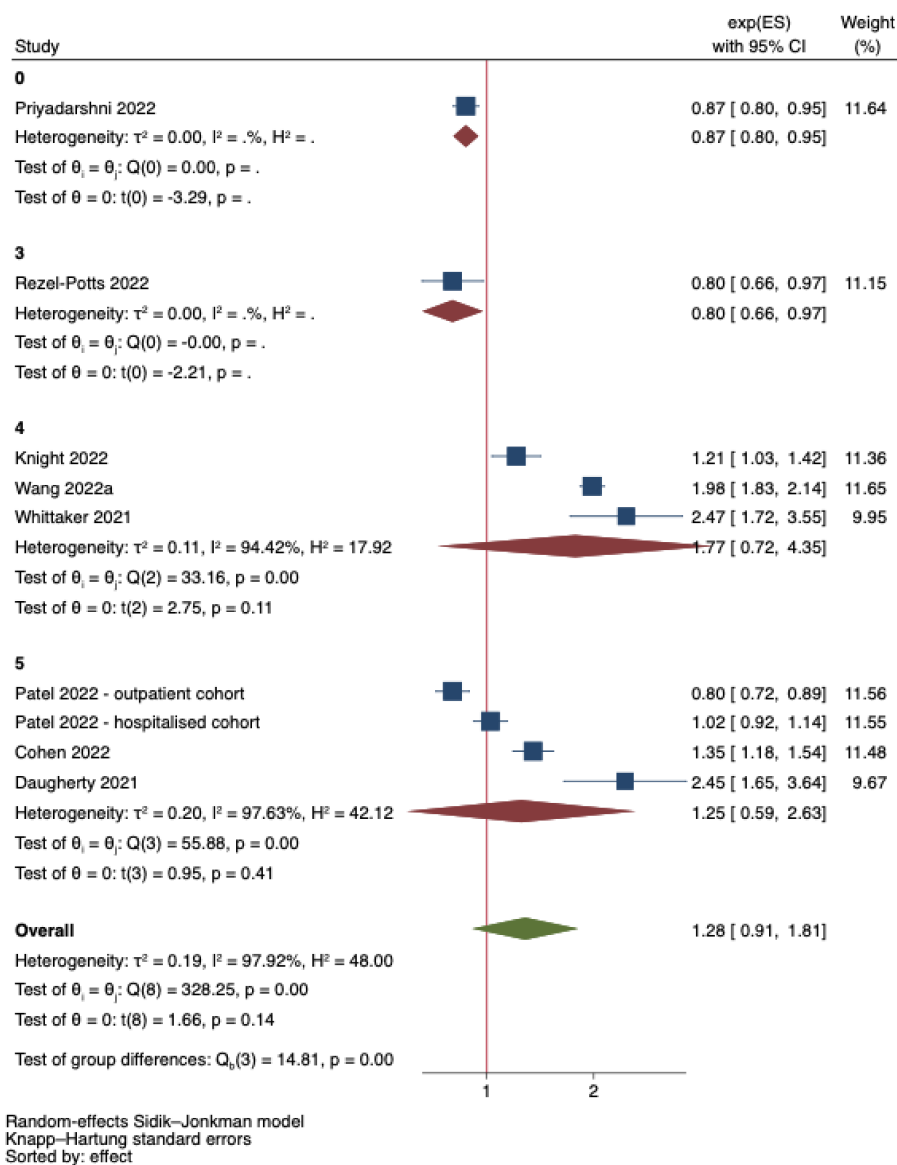

Meta-regression and testing for publication are not possible (<10 studies per variable). As there is little variation in effect estimates of the most adjusted group with the overall estimate, we used the overall estimate in the main manuscript.

## Analysis 3.9 Cardiogenic shock

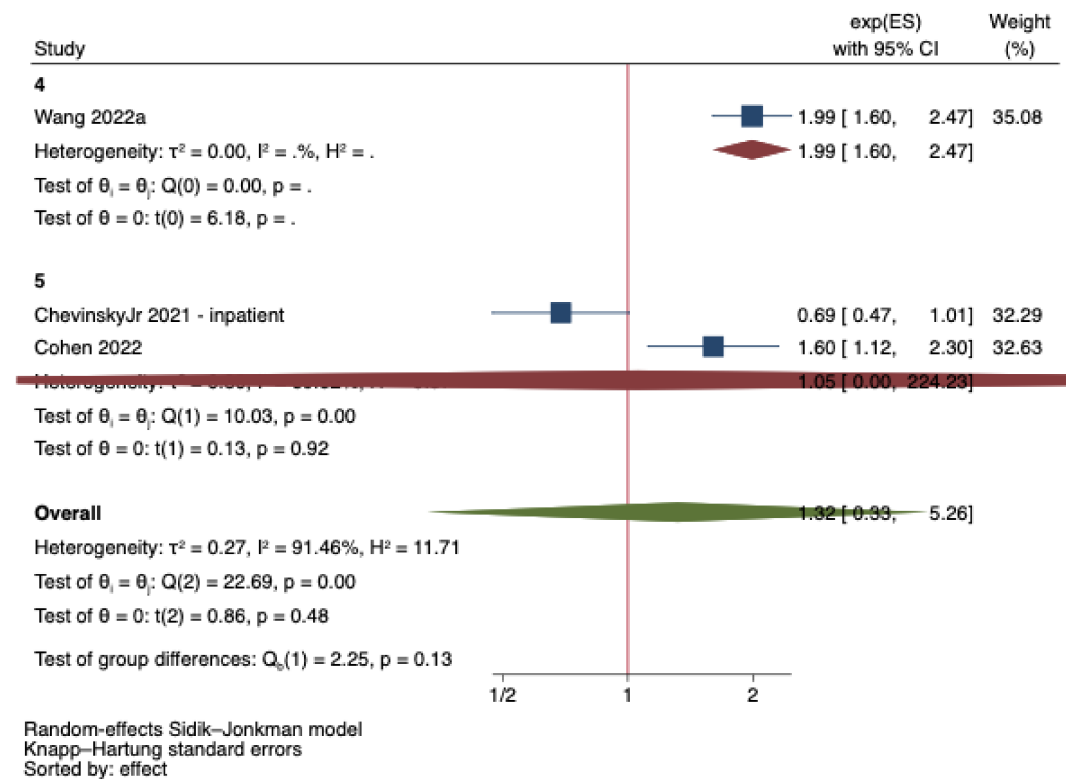

Meta-regression and testing for publication are not possible (<10 studies per variable). We used the most adjusted estimate in the manuscript.

## Analysis 3.10 Cardiomyopathy

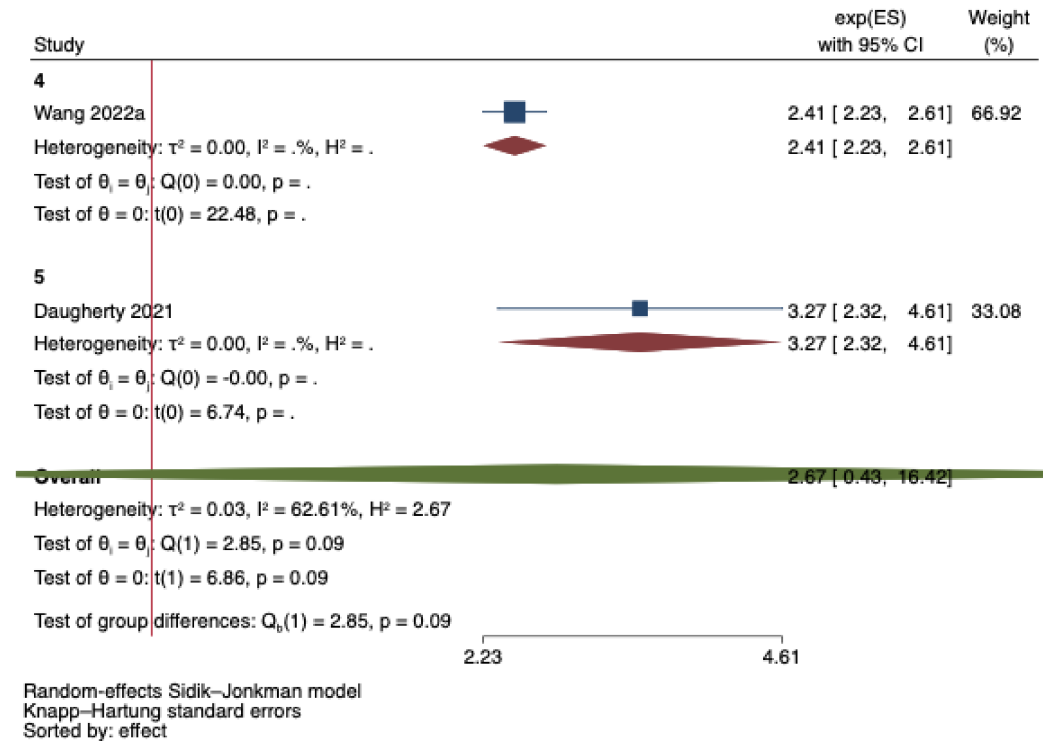

Meta-regression and testing for publication are not possible (<10 studies per variable). We used the most adjusted estimate in the manuscript.

## Analysis 3.11 Peripheral artery disease

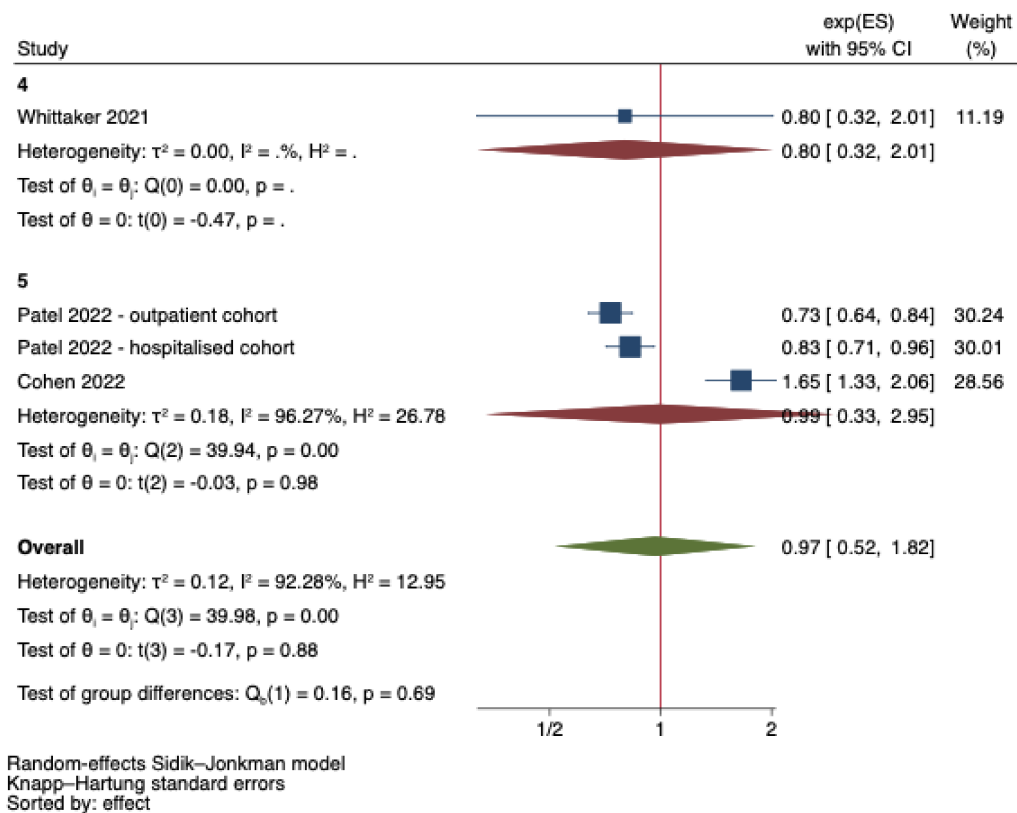

Meta-regression and testing for publication are not possible (<10 studies per variable). As there is little variation in effect estimates of the most adjusted group with the overall estimate, we used the overall estimate in the main manuscript.

## Analysis 3.12 Deep vein thrombosis

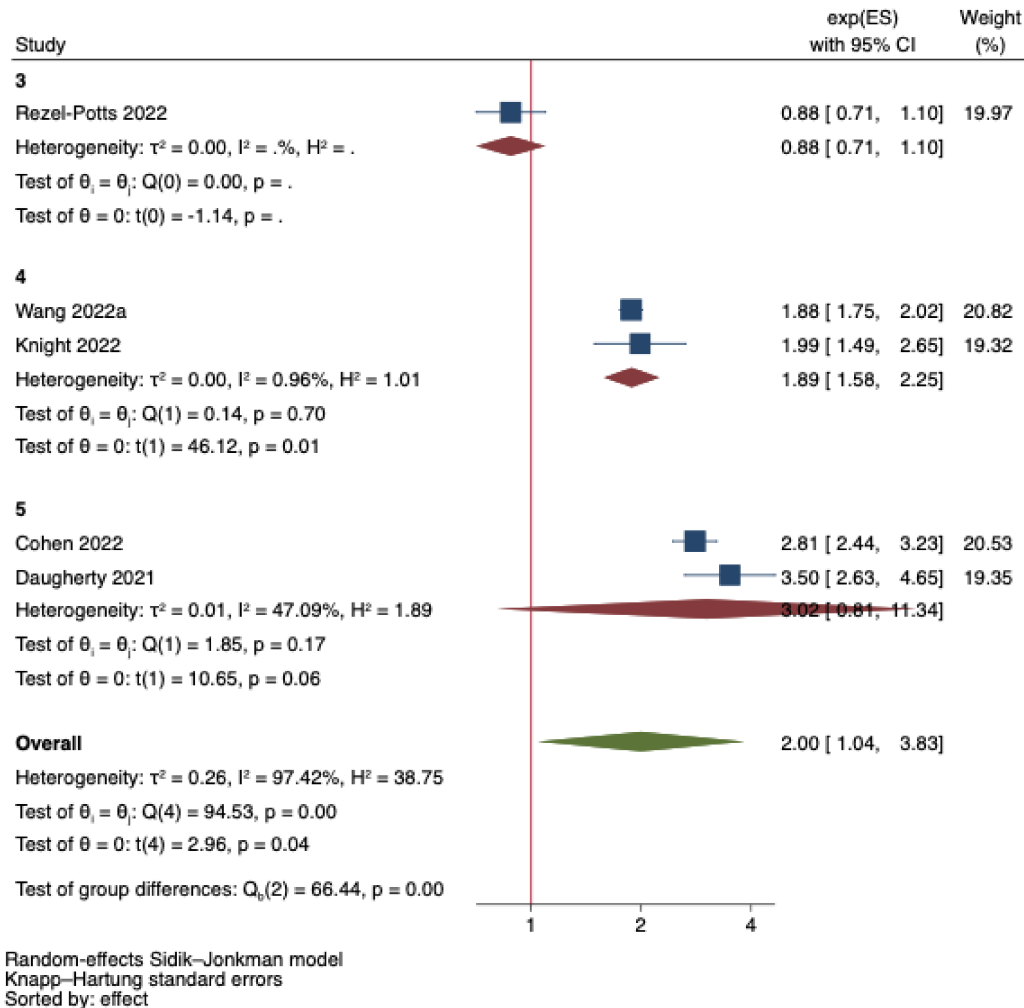

Meta-regression and testing for publication are not possible (<10 studies per variable). We used the most adjusted estimate in the manuscript.

## Analysis 3.13 Pulmonary embolism

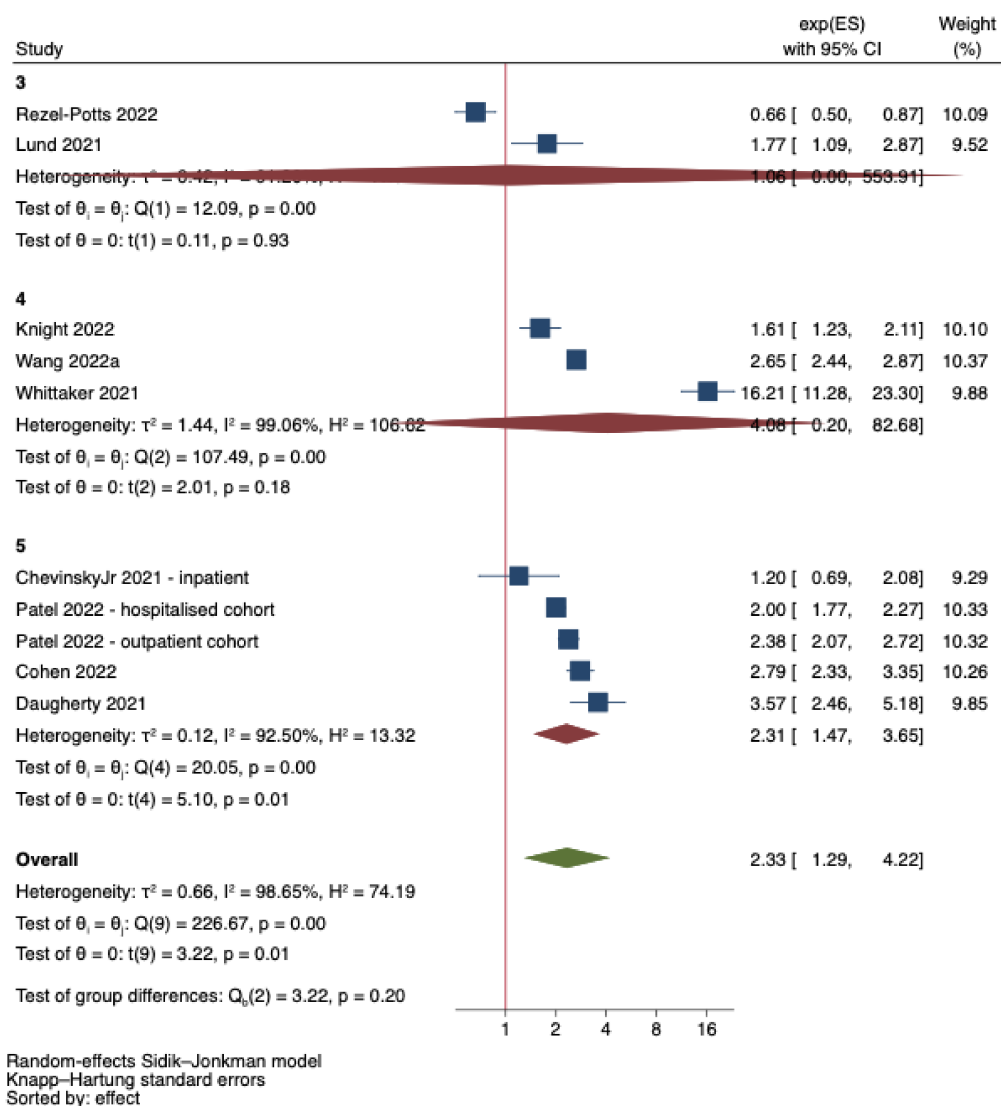

Meta-regression and testing for publication are not possible (<10 studies per variable). As there is little variation in effect estimates of the most adjusted group with the overall estimate, we used the overall estimate in the main manuscript.

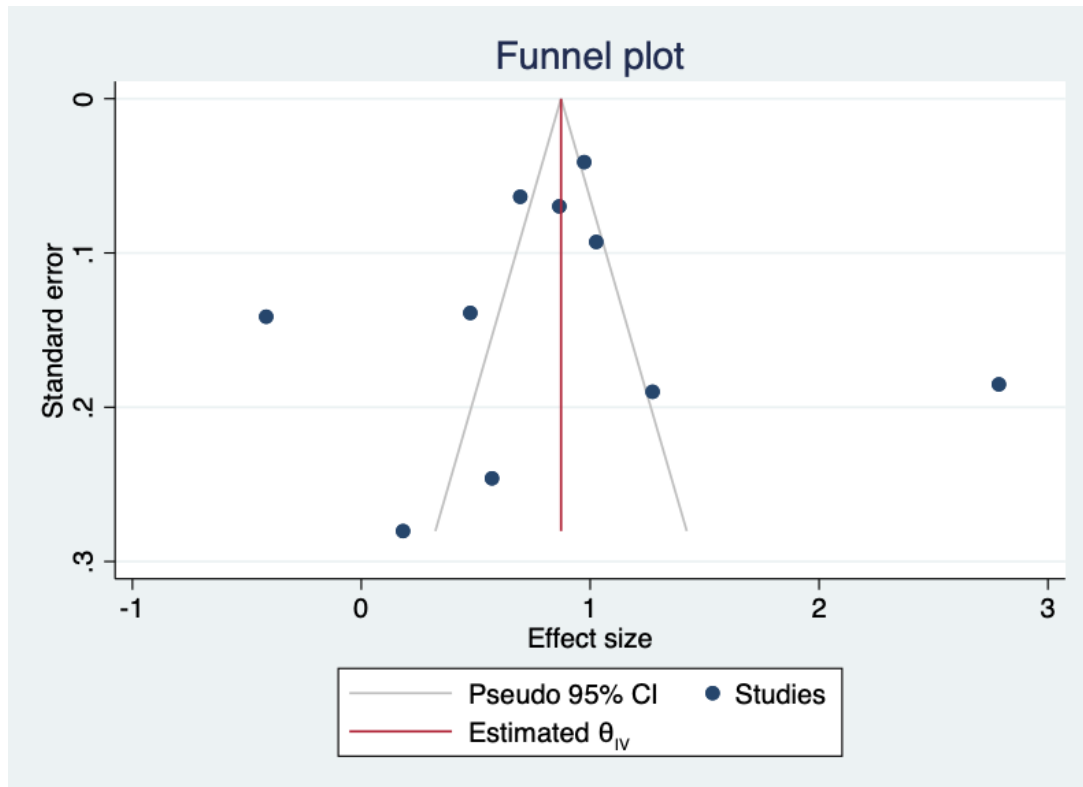**Publication bias (Egger)**

H0:  $\beta_{11} = 0$ ; no small-study effects  
beta1 = -0.35  
SE of beta1 = 3.665  
z = -0.09  
Prob > |z| = 0.9247

## Analysis 3.14 Ischemic stroke

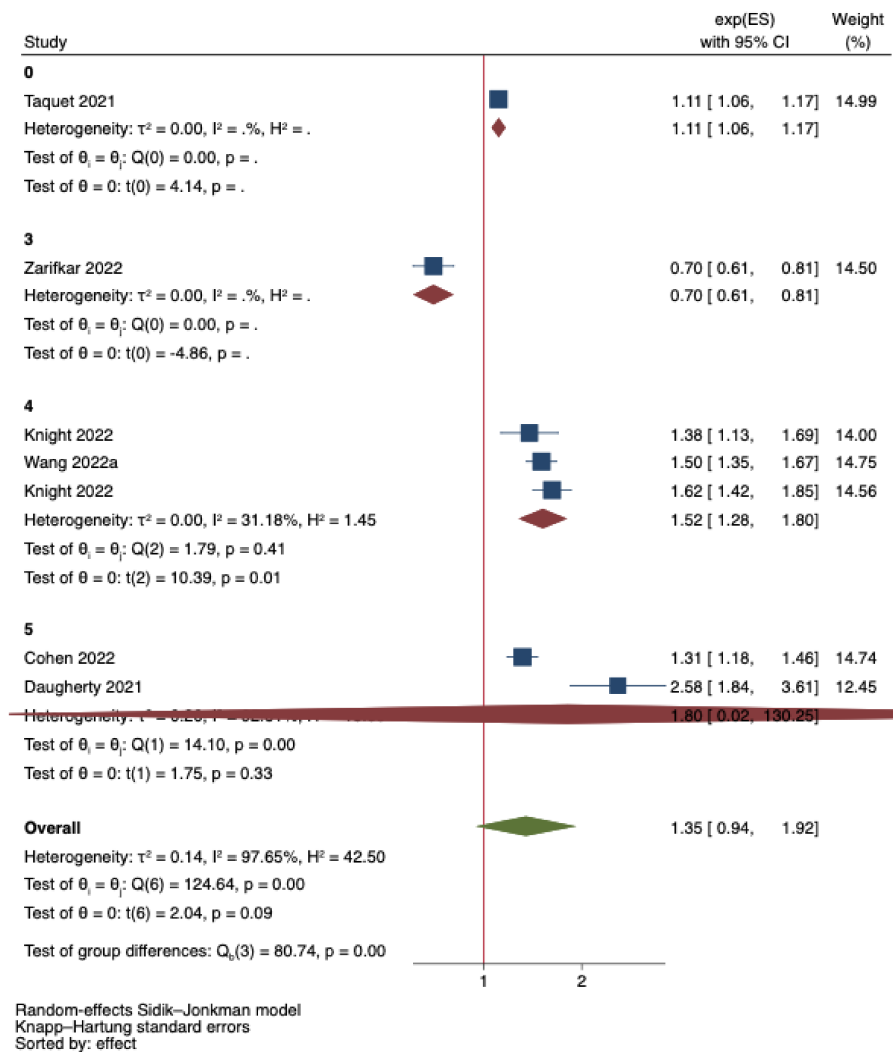

Meta-regression and testing for publication are not possible (<10 studies per variable). We used the most adjusted estimate in the manuscript.





## Analysis 3.16 Stroke (global)

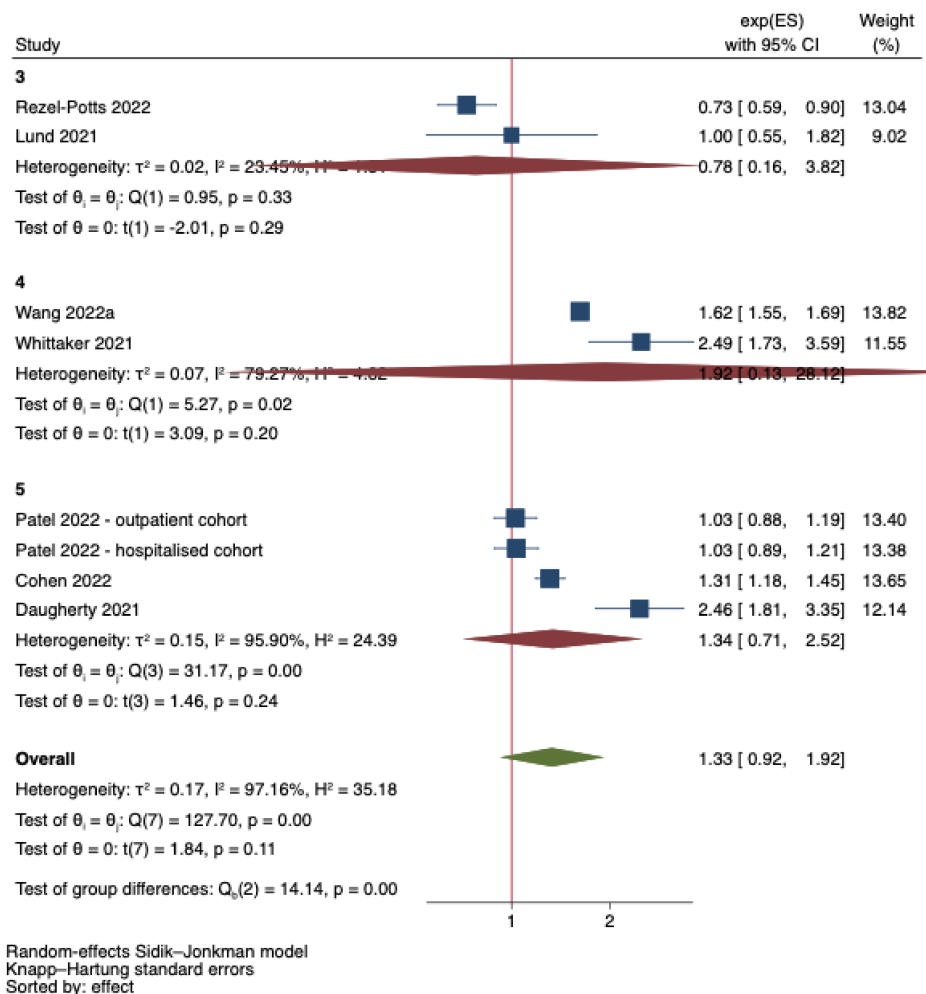

Meta-regression and testing for publication are not possible (<10 studies per variable). As there is little variation in effect estimates of the most adjusted group with the overall estimate, we used the overall estimate in the main manuscript.

## Analysis 4.1 Sensory disorder

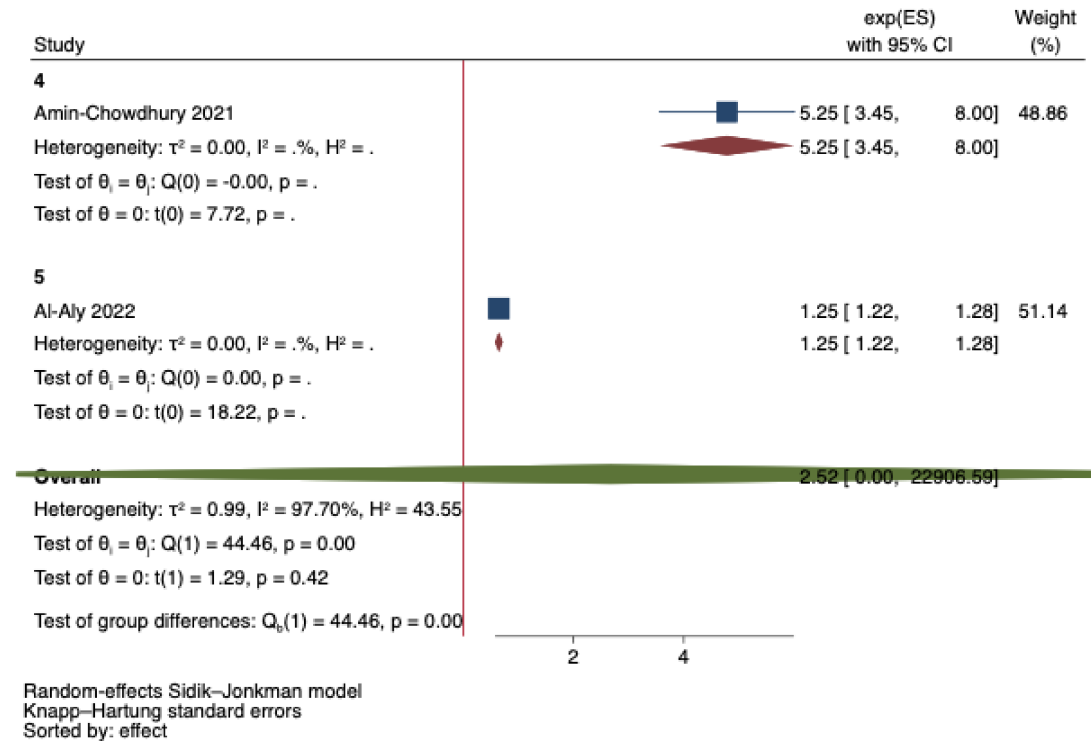

Meta-regression and testing for publication are not possible (<10 studies per variable). We used the most adjusted estimate in the manuscript.

## Analysis 4.2 Cognitive Impairment

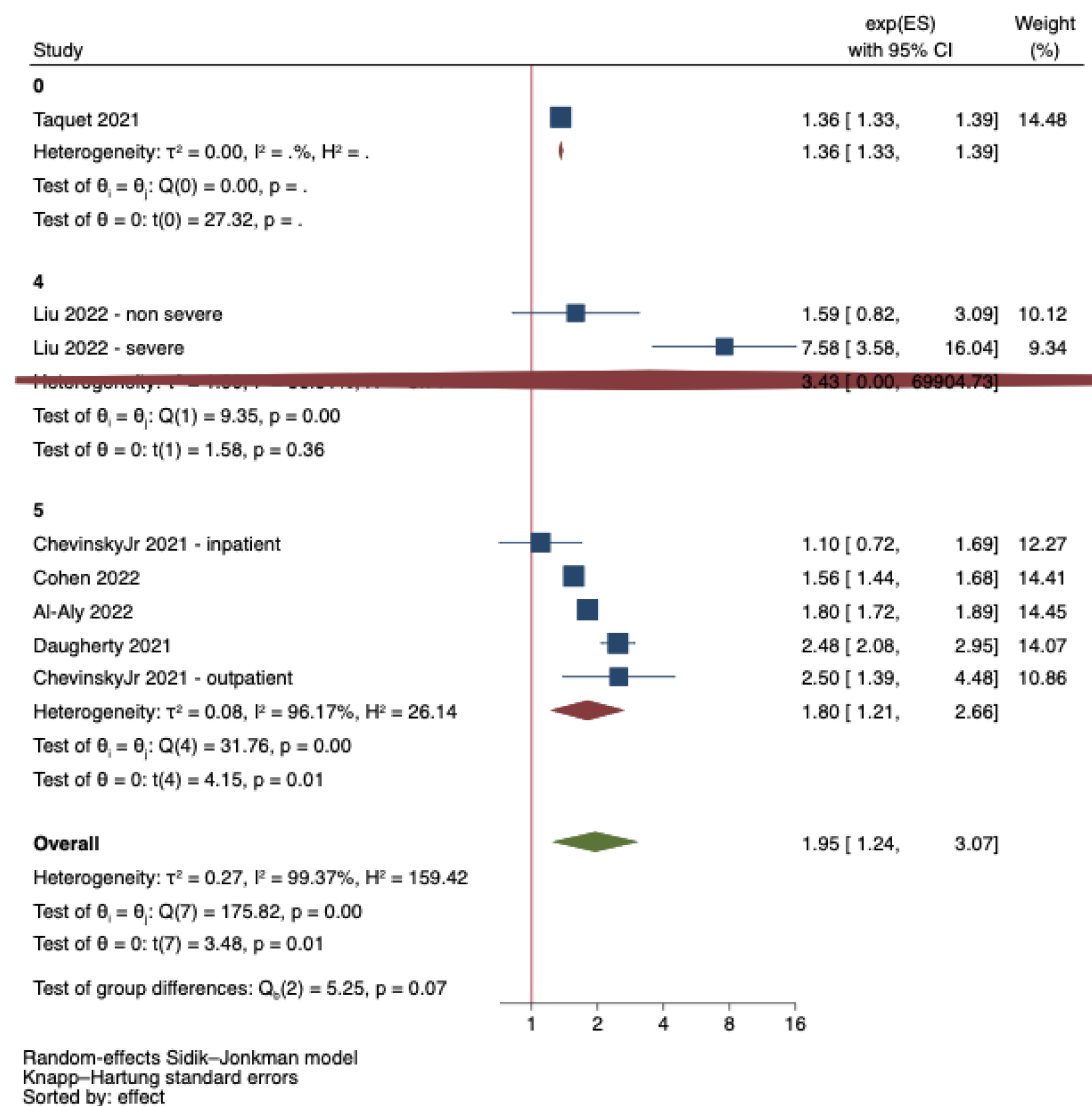

Meta-regression and testing for publication are not possible (<10 studies per variable). As there is little variation in effect estimates of the most adjusted group with the overall estimate, we used the overall estimate in the main manuscript.

## Analysis 4.3. Dementia

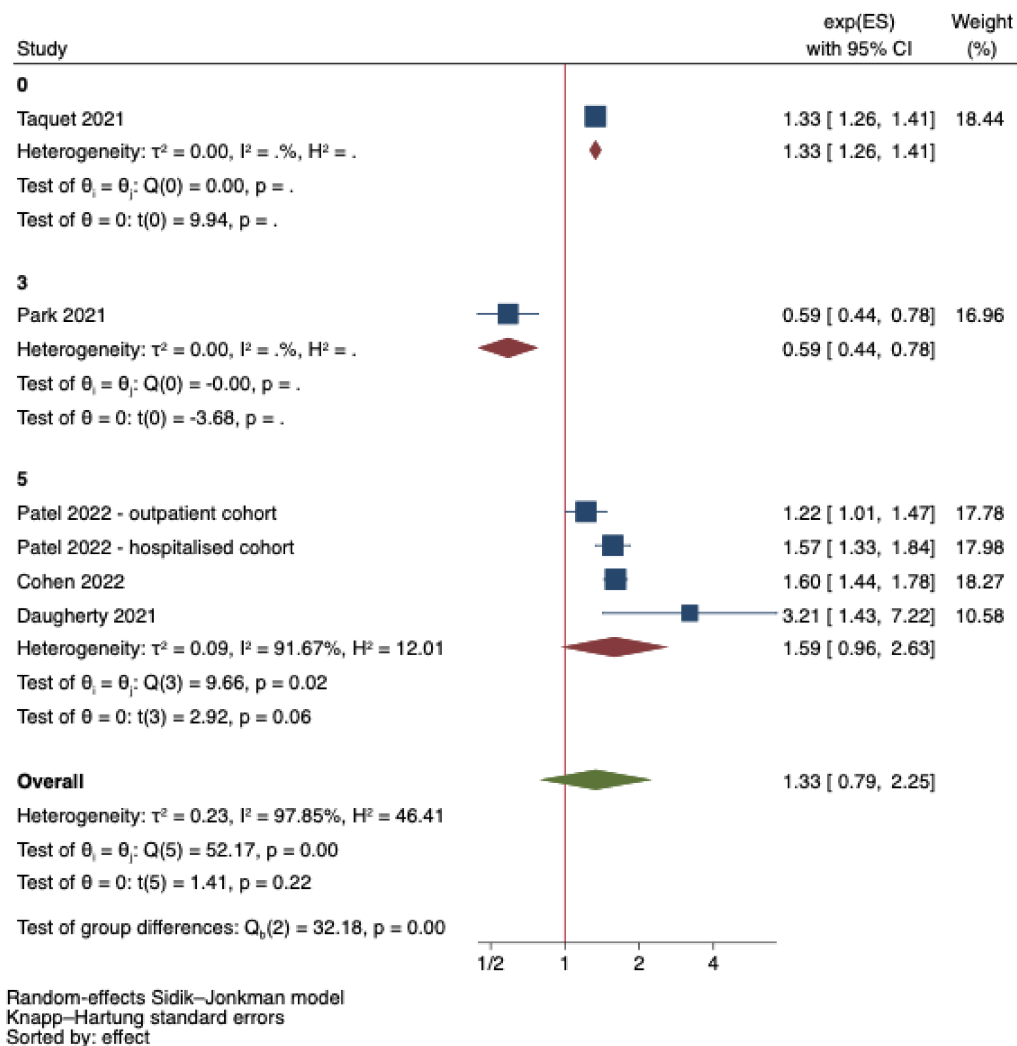

Meta-regression and testing for publication are not possible (<10 studies per variable). As there is little variation in effect estimates of the most adjusted group with the overall estimate, we used the overall estimate in the main manuscript.

## Analysis 4.4 Alzheimer's Disease

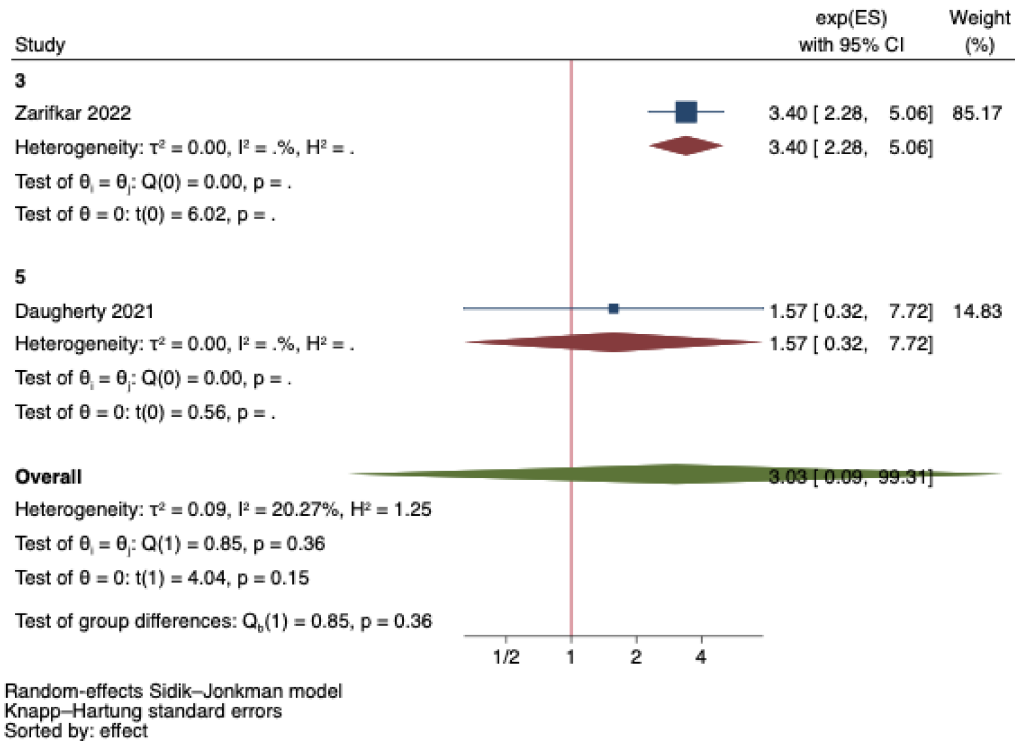

Meta-regression and testing for publication are not possible (<10 studies per variable). We used the most adjusted estimate in the manuscript.

## Analysis 4.5 Extrapyramidal and movement disorders

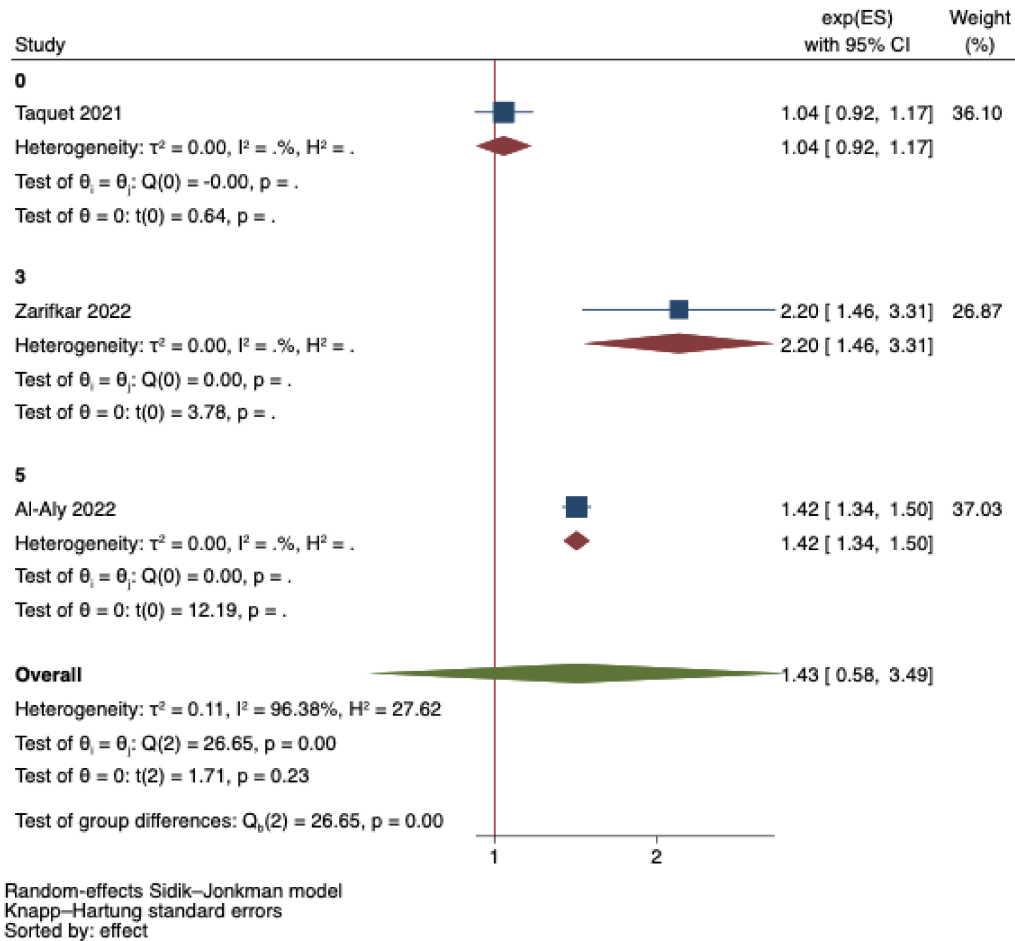

Meta-regression and testing for publication are not possible (<10 studies per variable). As there is little variation in effect estimates of the most adjusted group with the overall estimate, we used the overall estimate in the main manuscript.

## Analysis 4.6 Sleep apnea

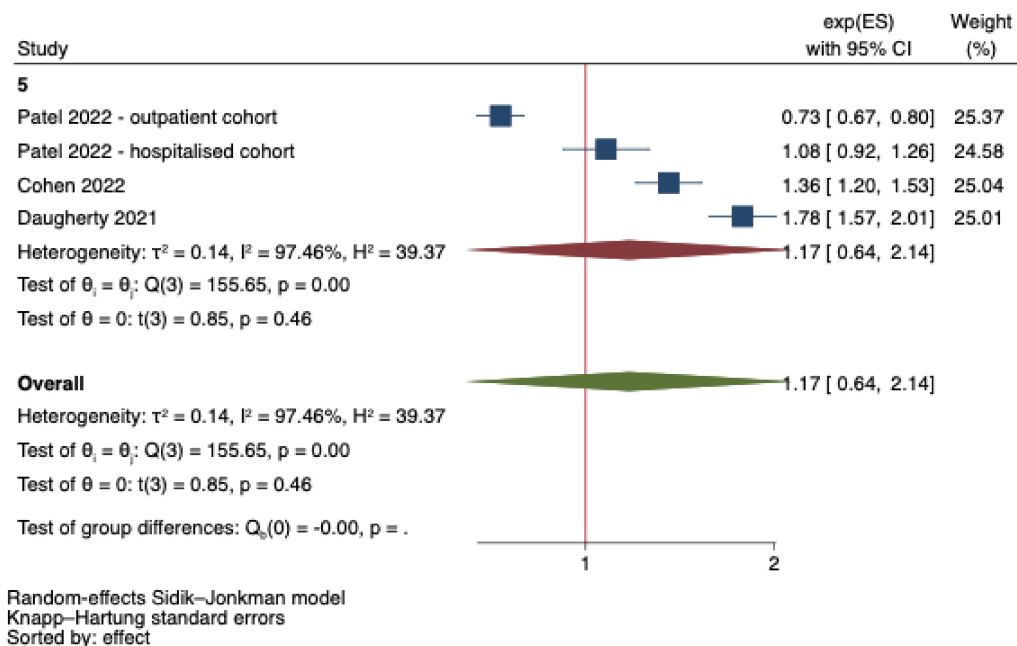

Meta-regression and testing for publication are not possible (<10 studies per variable). All studies were fully adjusted.



## Analysis 4.7 Other sleep disorders

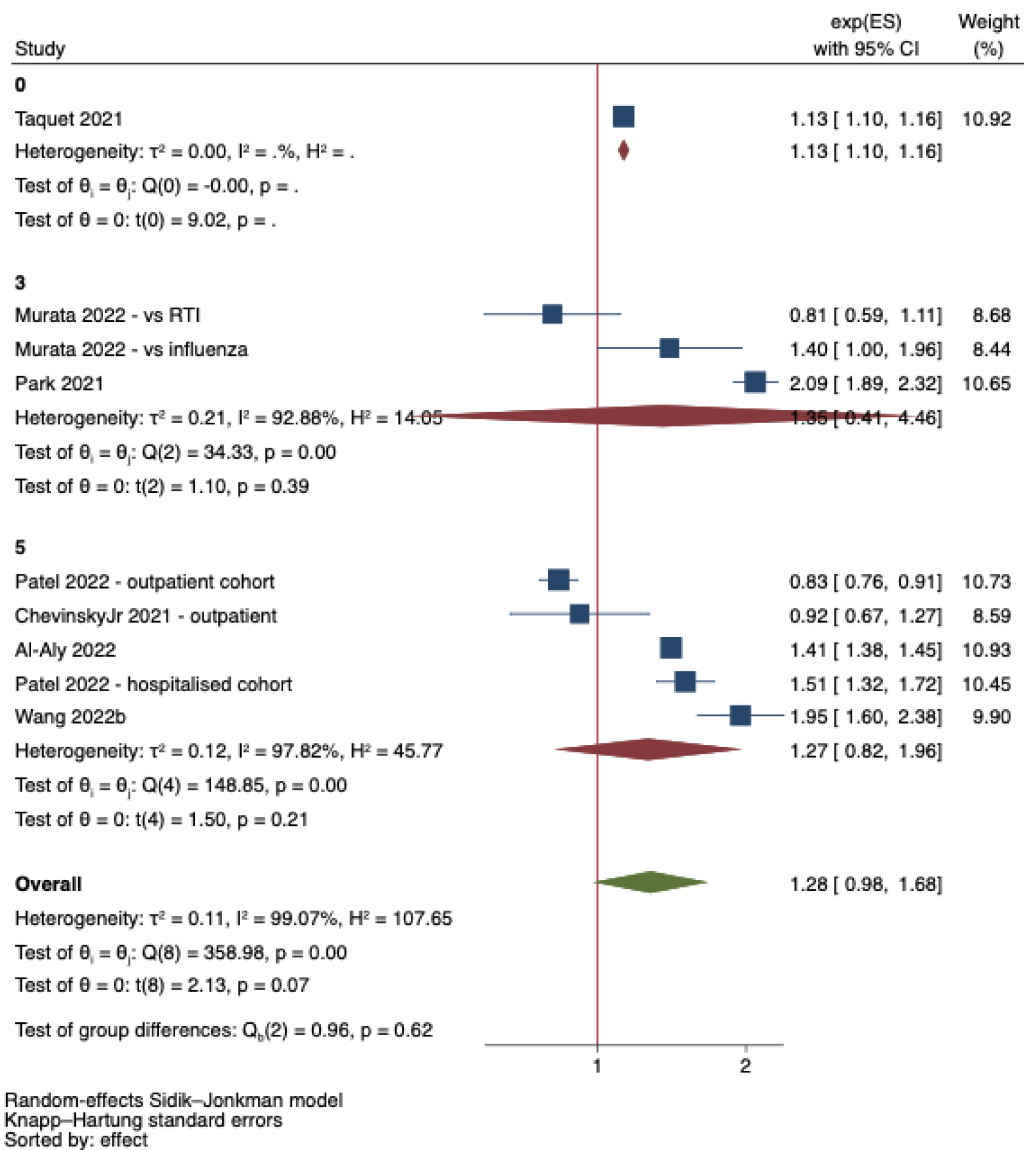

Meta-regression and testing for publication are not possible (<10 studies per variable). As there is little variation in effect estimates of the most adjusted group with the overall estimate, we used the overall estimate in the main manuscript.

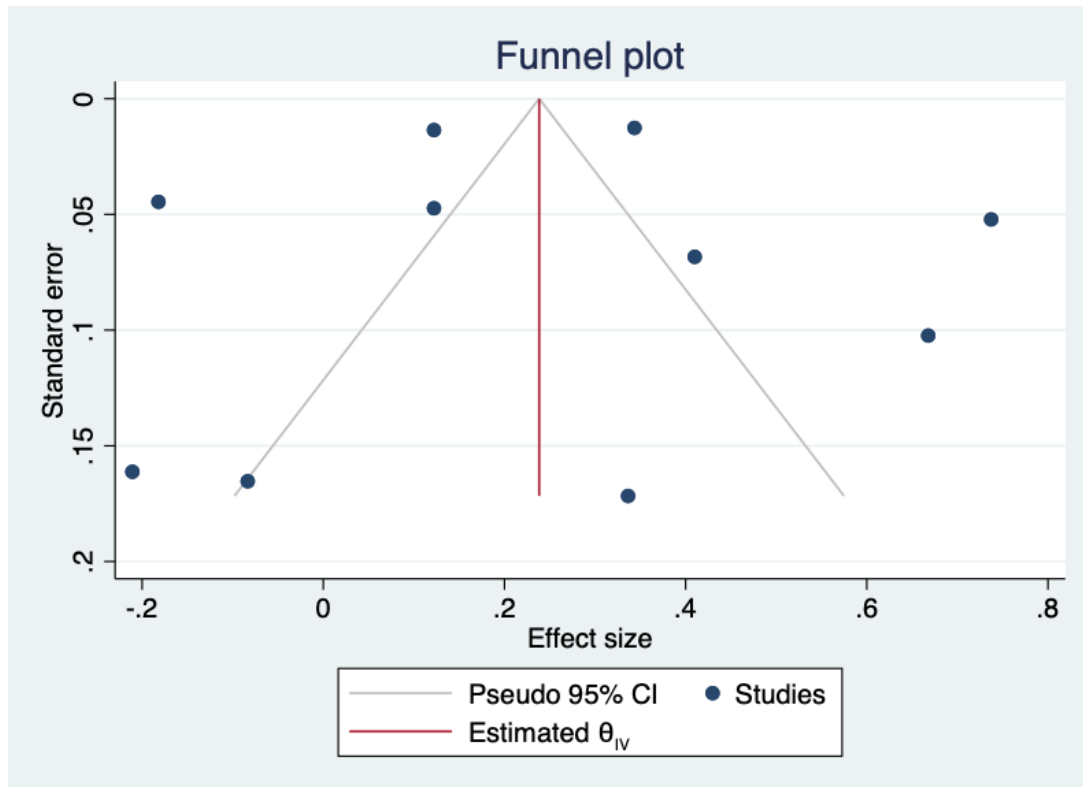**Publication bias (Egger)**H0:  $\beta_{11} = 0$ ; no small-study effects $\beta_{11} = -1.06$ SE of  $\beta_{11} = 1.888$  $z = -0.56$ Prob >  $|z| = 0.5750$

## Analysis 4.8 Peripheral Neuropathy

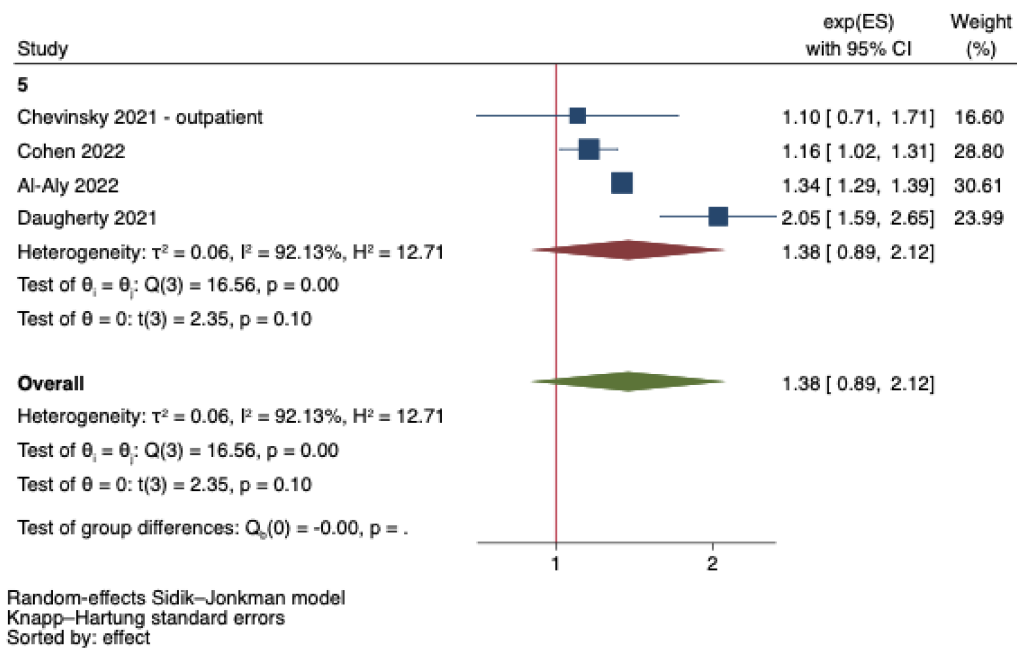

Meta-regression and testing for publication are not possible (<10 studies per variable). All studies were fully adjusted.

## Analysis 4.9 Epilepsy or seizures

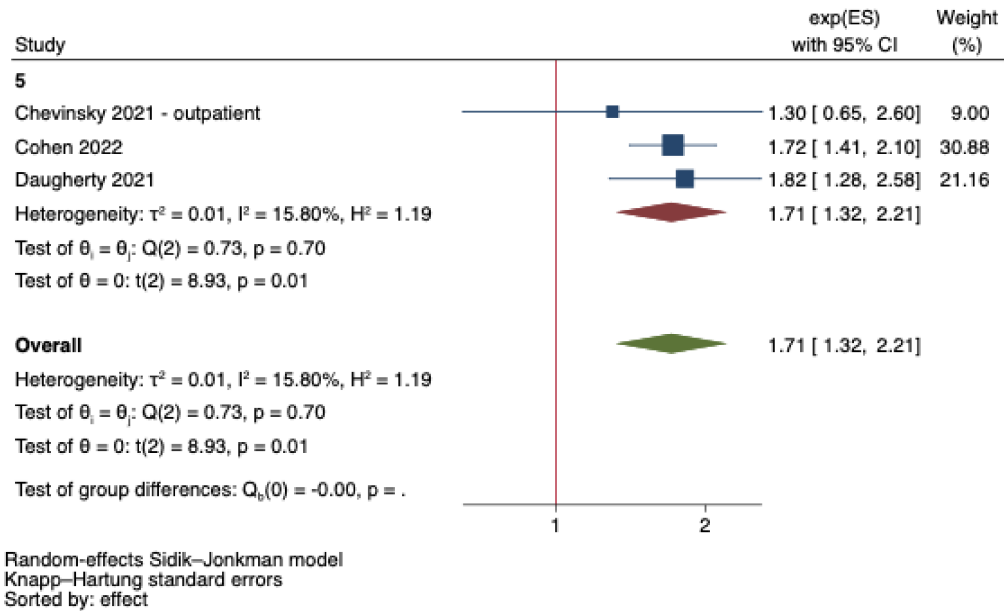

Meta-regression and testing for publication are not possible (<10 studies per variable). All studies were fully adjusted.

## Analysis 4.10 Guillain Barré syndrome

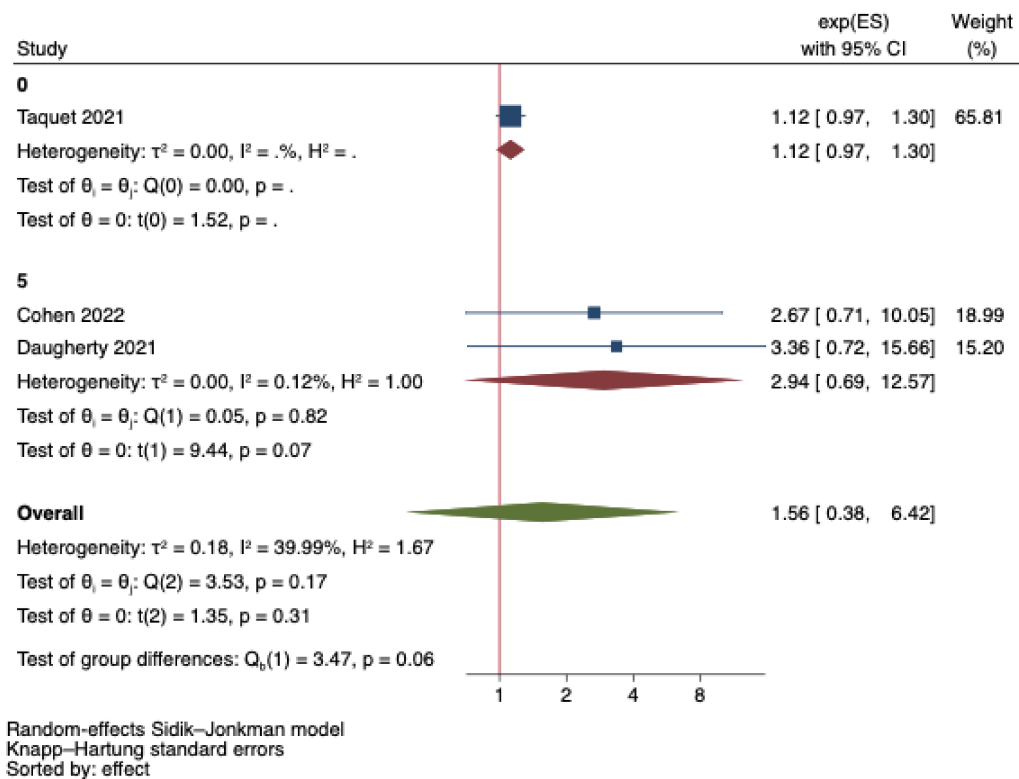

Meta-regression and testing for publication are not possible (<10 studies per variable). We used the most adjusted estimate in the manuscript.

## Analysis 4.11 Headaches and Migraines

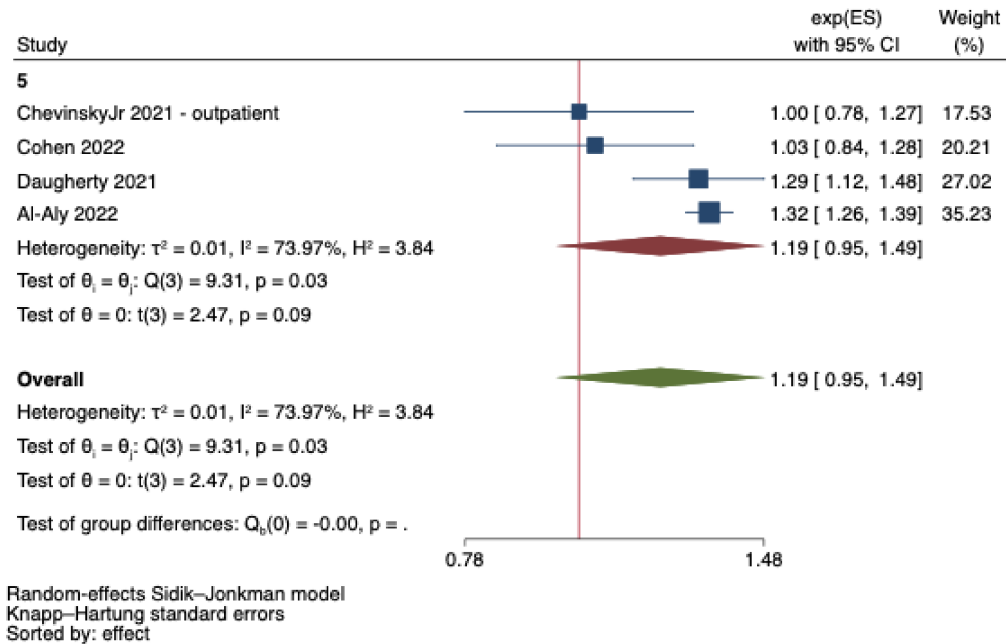

Meta-regression and testing for publication are not possible (<10 studies per variable). All studies were fully adjusted.

## Analysis 5.1 Acute kidney injury

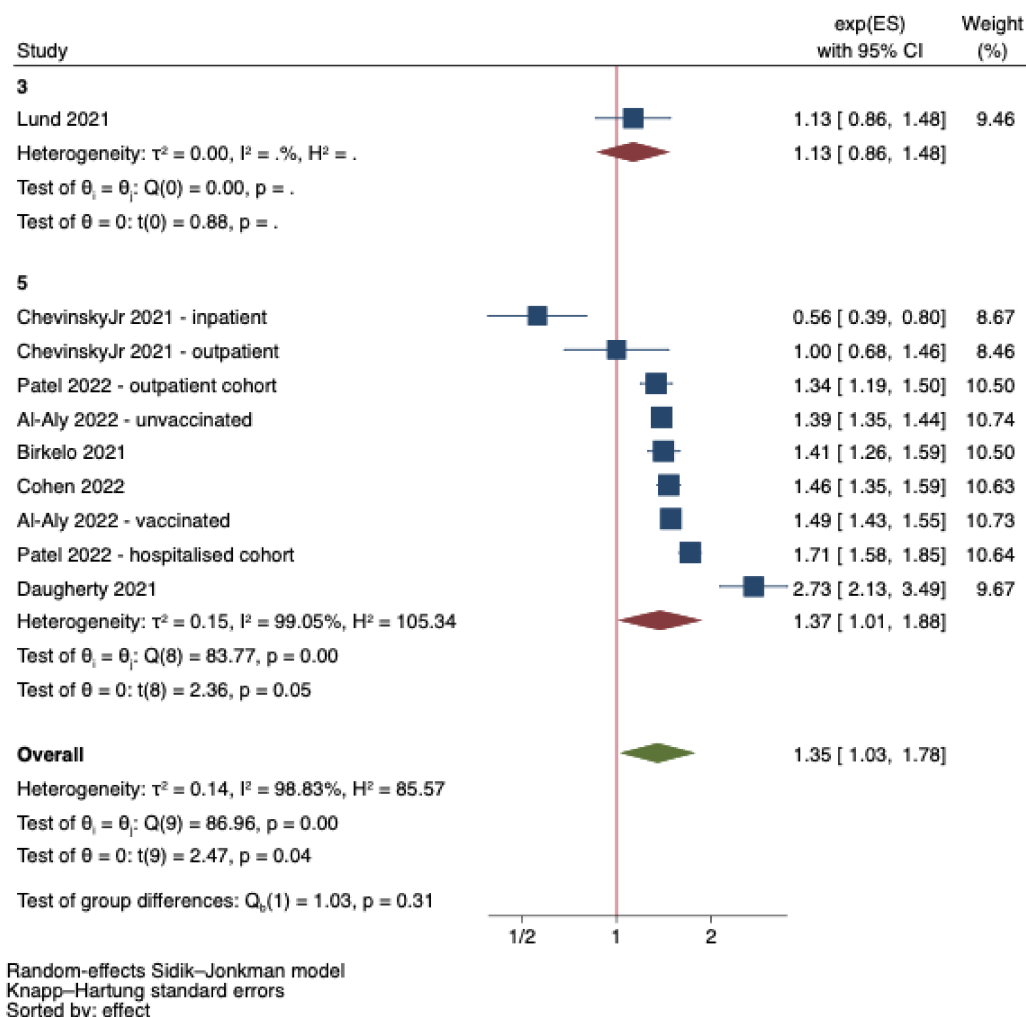

Meta-regression and testing for publication are not possible (<10 studies per variable). As there is little variation in effect estimates of the most adjusted group with the overall estimate, we used the overall estimate in the main manuscript.

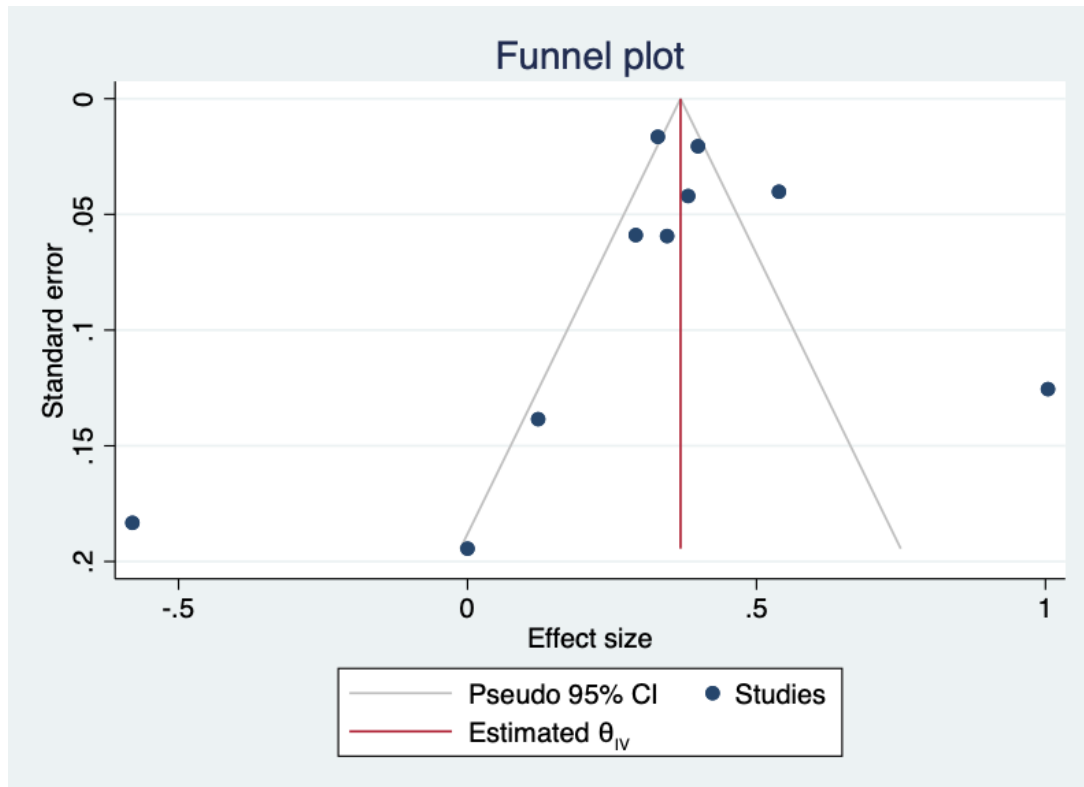**Publication bias (Egger)**

H0:  $\beta_{e1} = 0$ ; no small-study effects

|                    |   |        |
|--------------------|---|--------|
| $\beta_{e1}$       | = | -2.87  |
| SE of $\beta_{e1}$ | = | 1.864  |
| $z$                | = | -1.54  |
| Prob > $ z $       | = | 0.1240 |



## Analysis 5.2 Chronic kidney disease

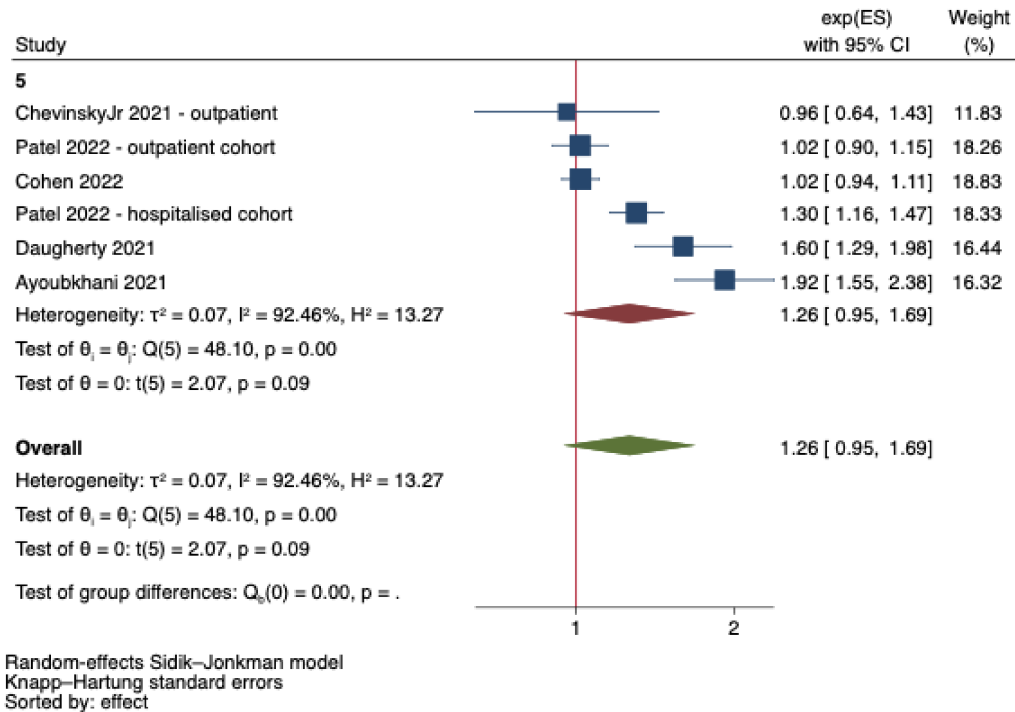

Meta-regression and testing for publication are not possible (<10 studies per variable). All studies were fully adjusted.

## Analysis 5.3 Fluid and electrolyte disorders

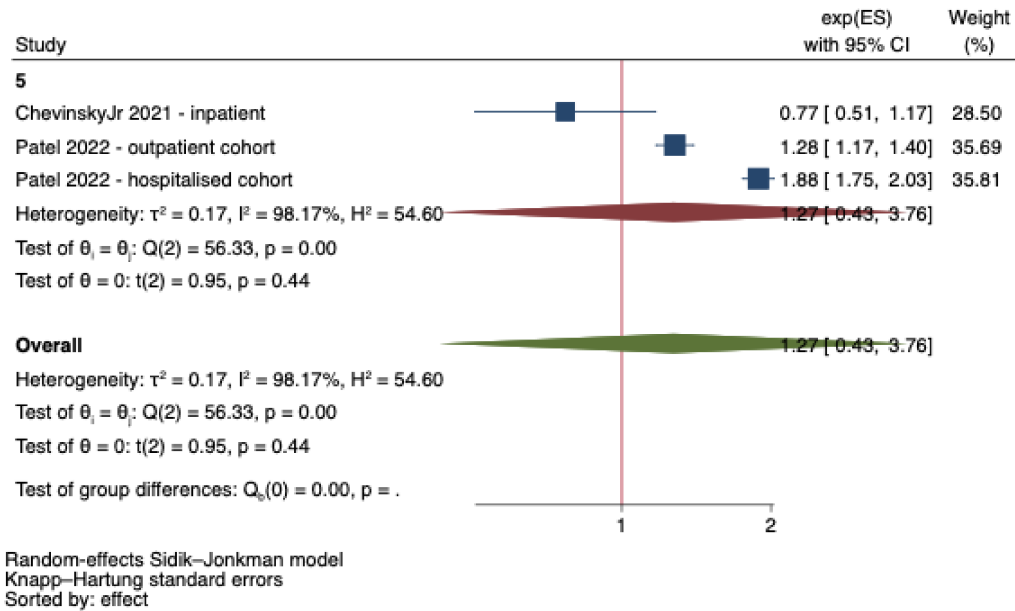

Meta-regression and testing for publication are not possible (<10 studies per variable). All studies were fully adjusted.

## Analysis 6.1 Liver disorders

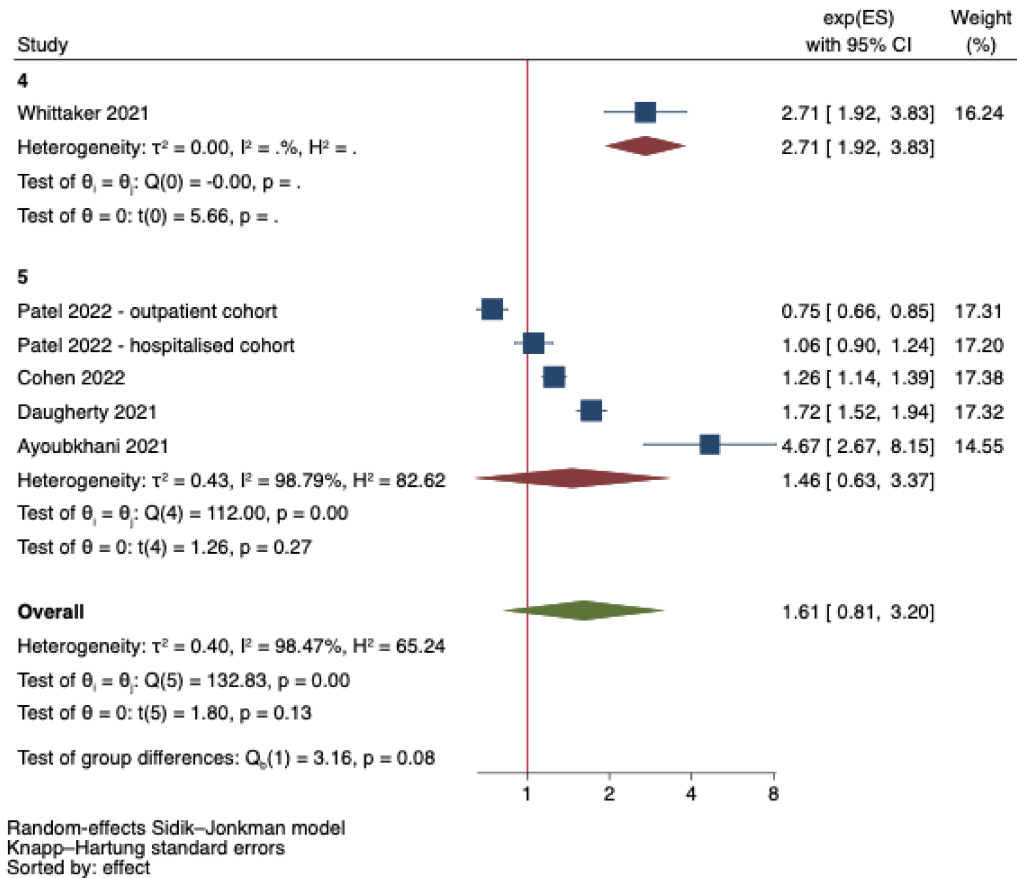

Meta-regression and testing for publication are not possible (<10 studies per variable). As there is little variation in effect estimates of the most adjusted group with the overall estimate, we used the overall estimate in the main manuscript.

## Analysis 7.1 Lung disorders (general)

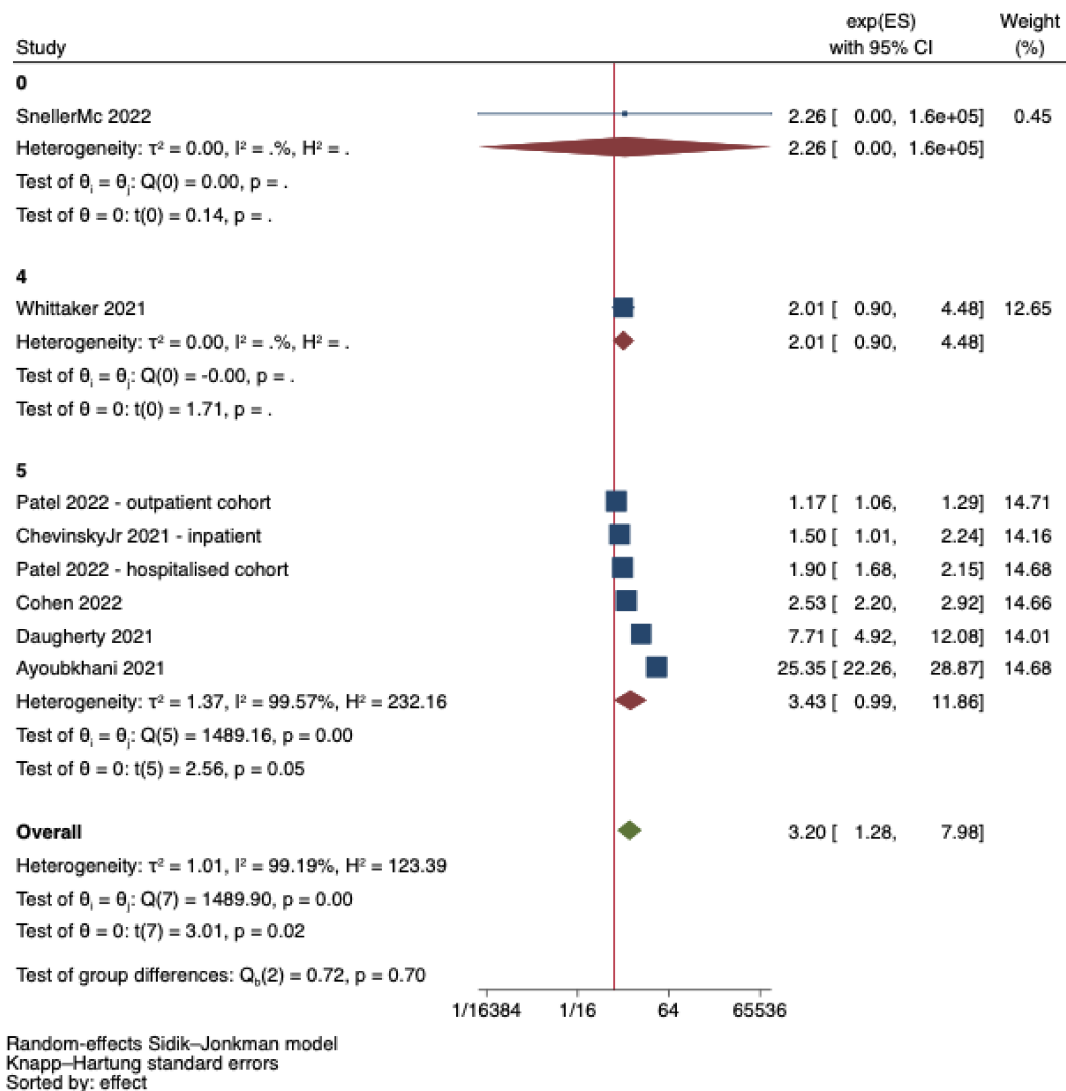

Meta-regression and testing for publication are not possible (<10 studies per variable). As there is little variation in effect estimates of the most adjusted group with the overall estimate, we used the overall estimate in the main manuscript.

## Analysis 7.2 Acute respiratory disorder

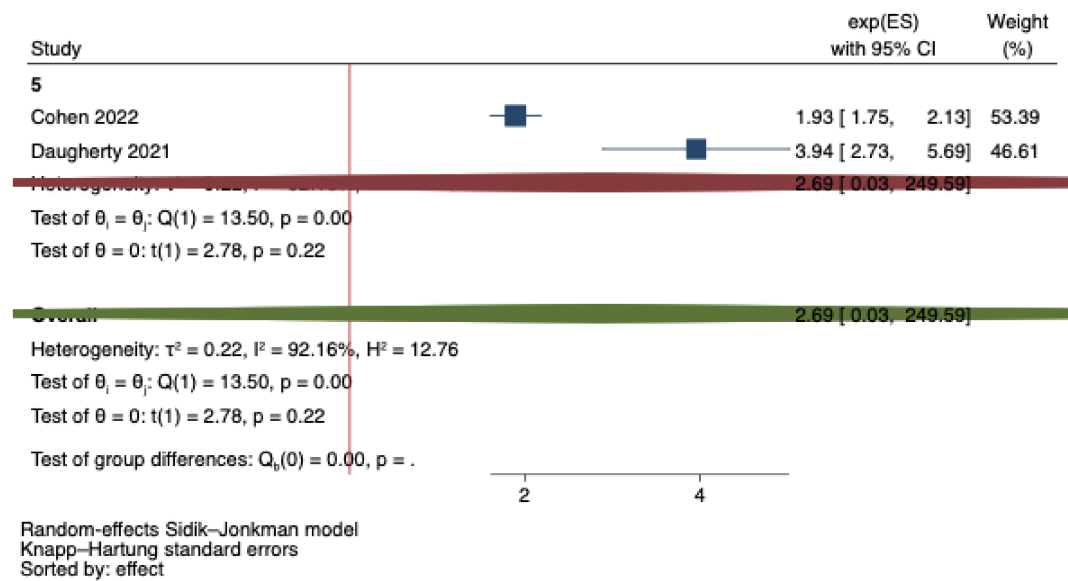

Meta-regression and testing for publication are not possible (<10 studies per variable). All studies were fully adjusted.

## Analysis 7.3 Chronic respiratory failure

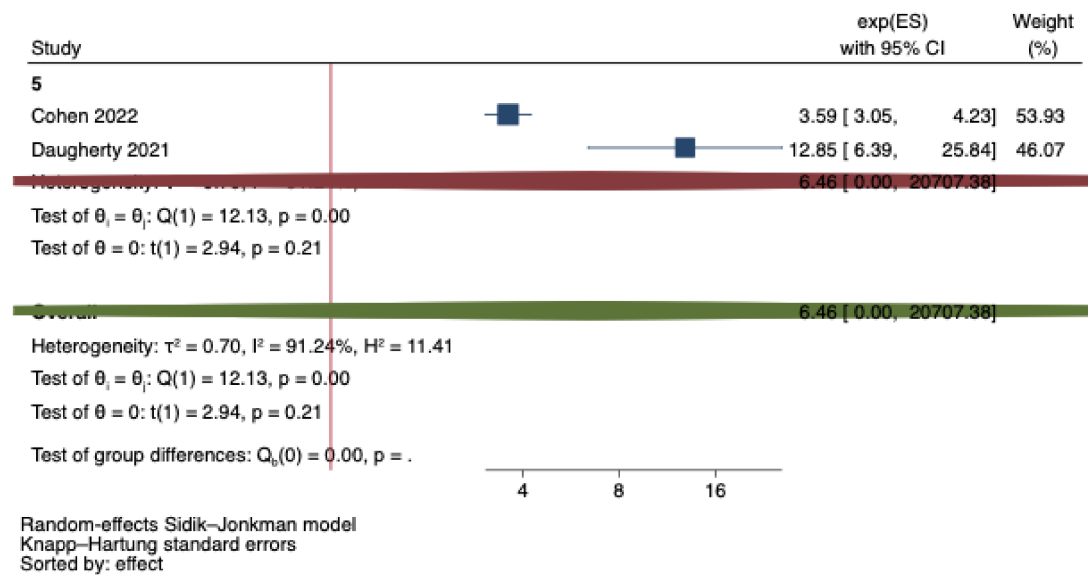

Meta-regression and testing for publication are not possible (<10 studies per variable). All studies were fully adjusted.

## Analysis 7.4 Respiratory failure (unspecified)

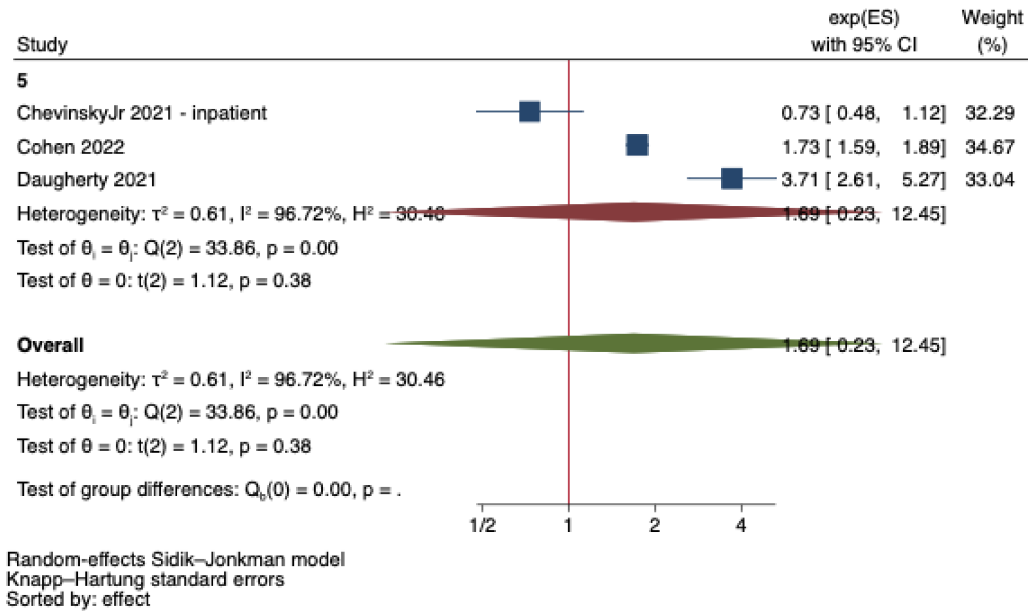

Meta-regression and testing for publication are not possible (<10 studies per variable). All studies were fully adjusted.

## Analysis 8.1 Coagulation disorders

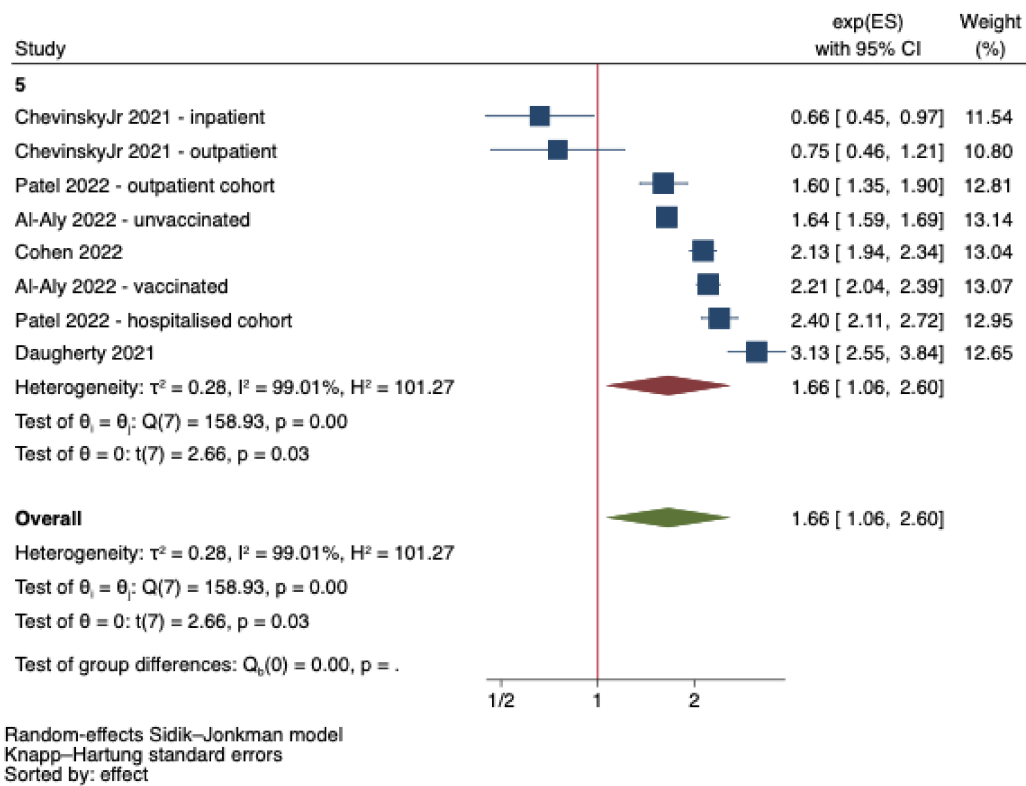

Meta-regression and testing for publication are not possible (<10 studies per variable). All studies were fully adjusted.



## Analysis 8.2 Anemia

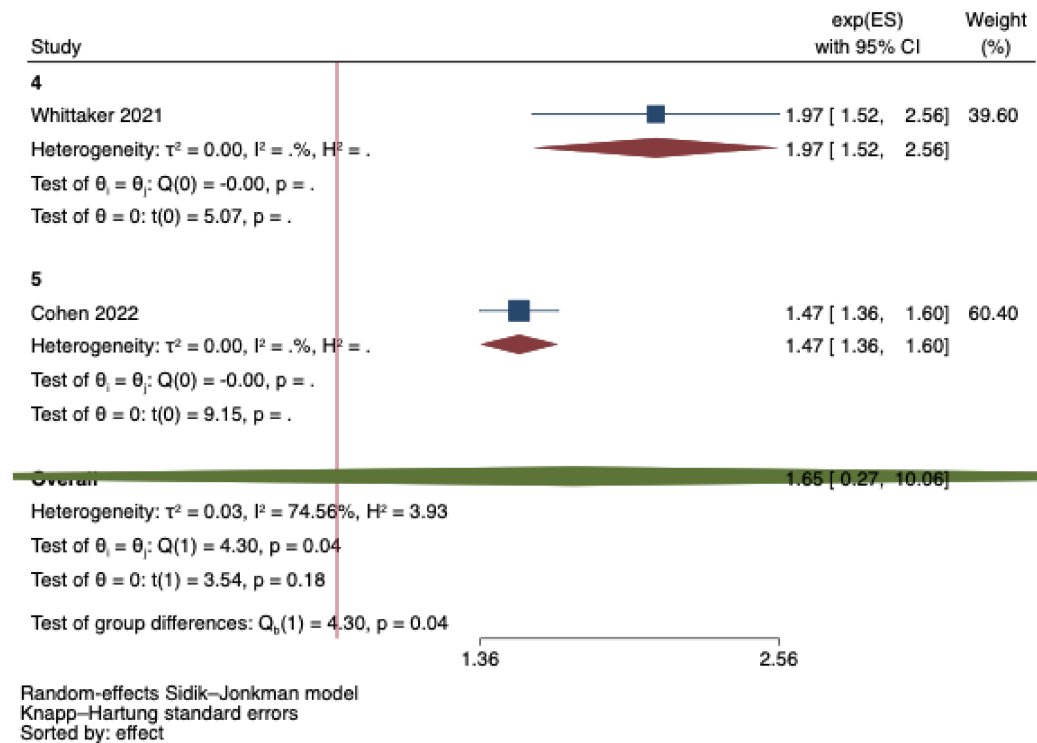

Meta-regression and testing for publication are not possible (<10 studies per variable). As there is little variation in effect estimates of the most adjusted group with the overall estimate, we used the overall estimate in the main manuscript.

## Analysis 8.3 Urticaria

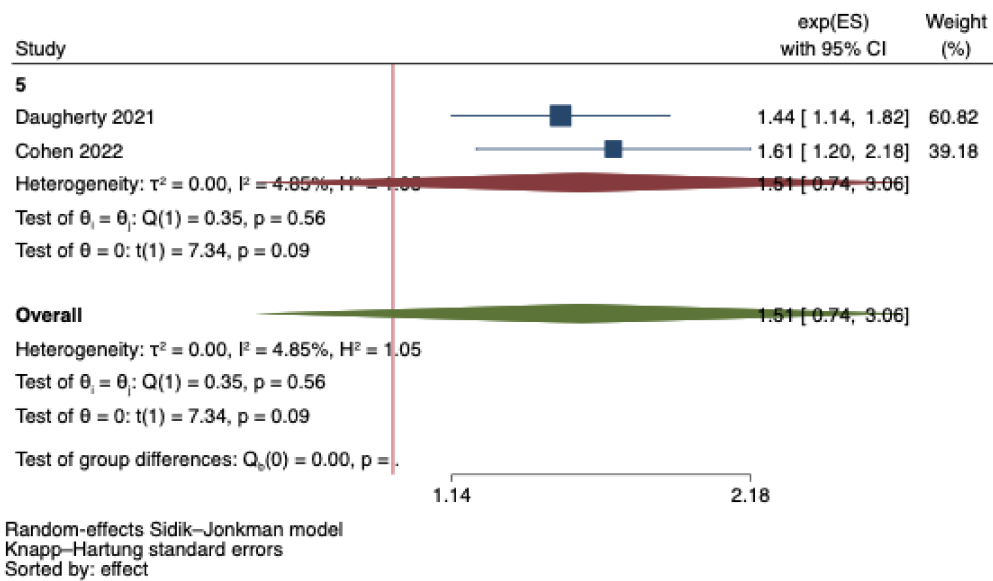

Meta-regression and testing for publication are not possible (<10 studies per variable). All studies were fully adjusted.

## Analysis 8.4 Atopic dermatitis

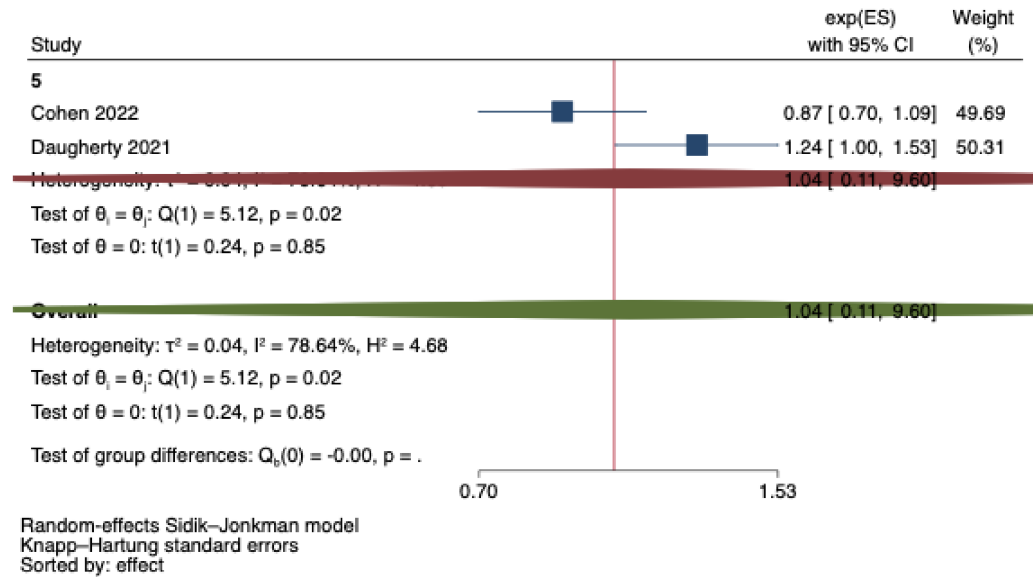

Meta-regression and testing for publication are not possible (<10 studies per variable). All studies were fully adjusted.

## Analysis 9. Other diagnosis (no meta-analysis)

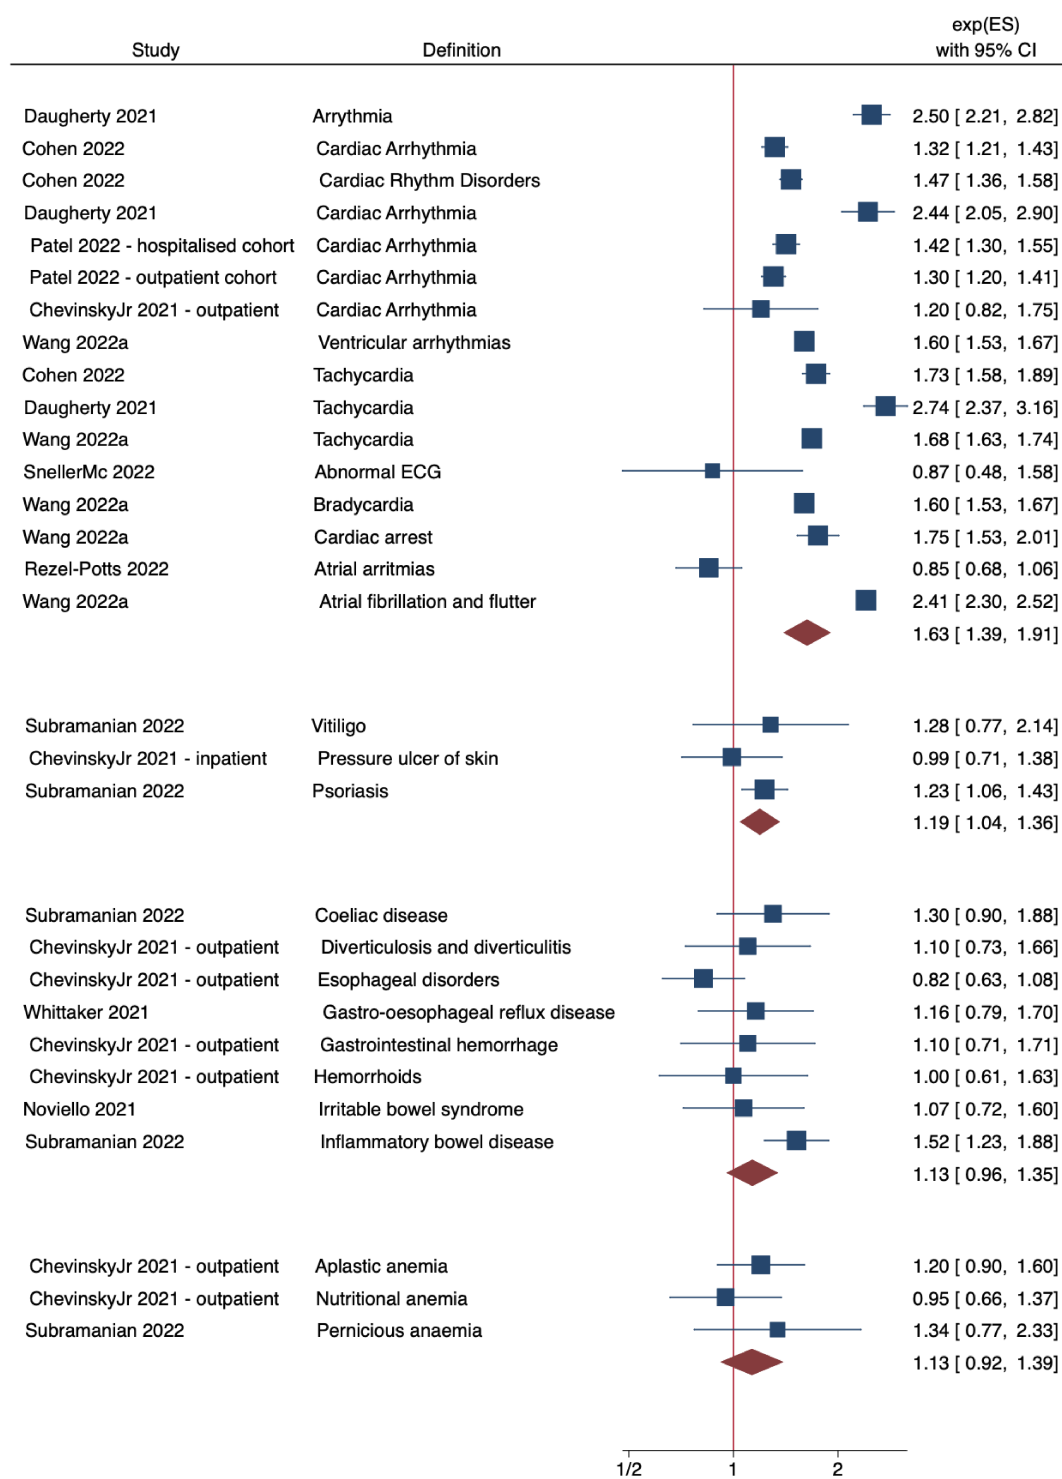

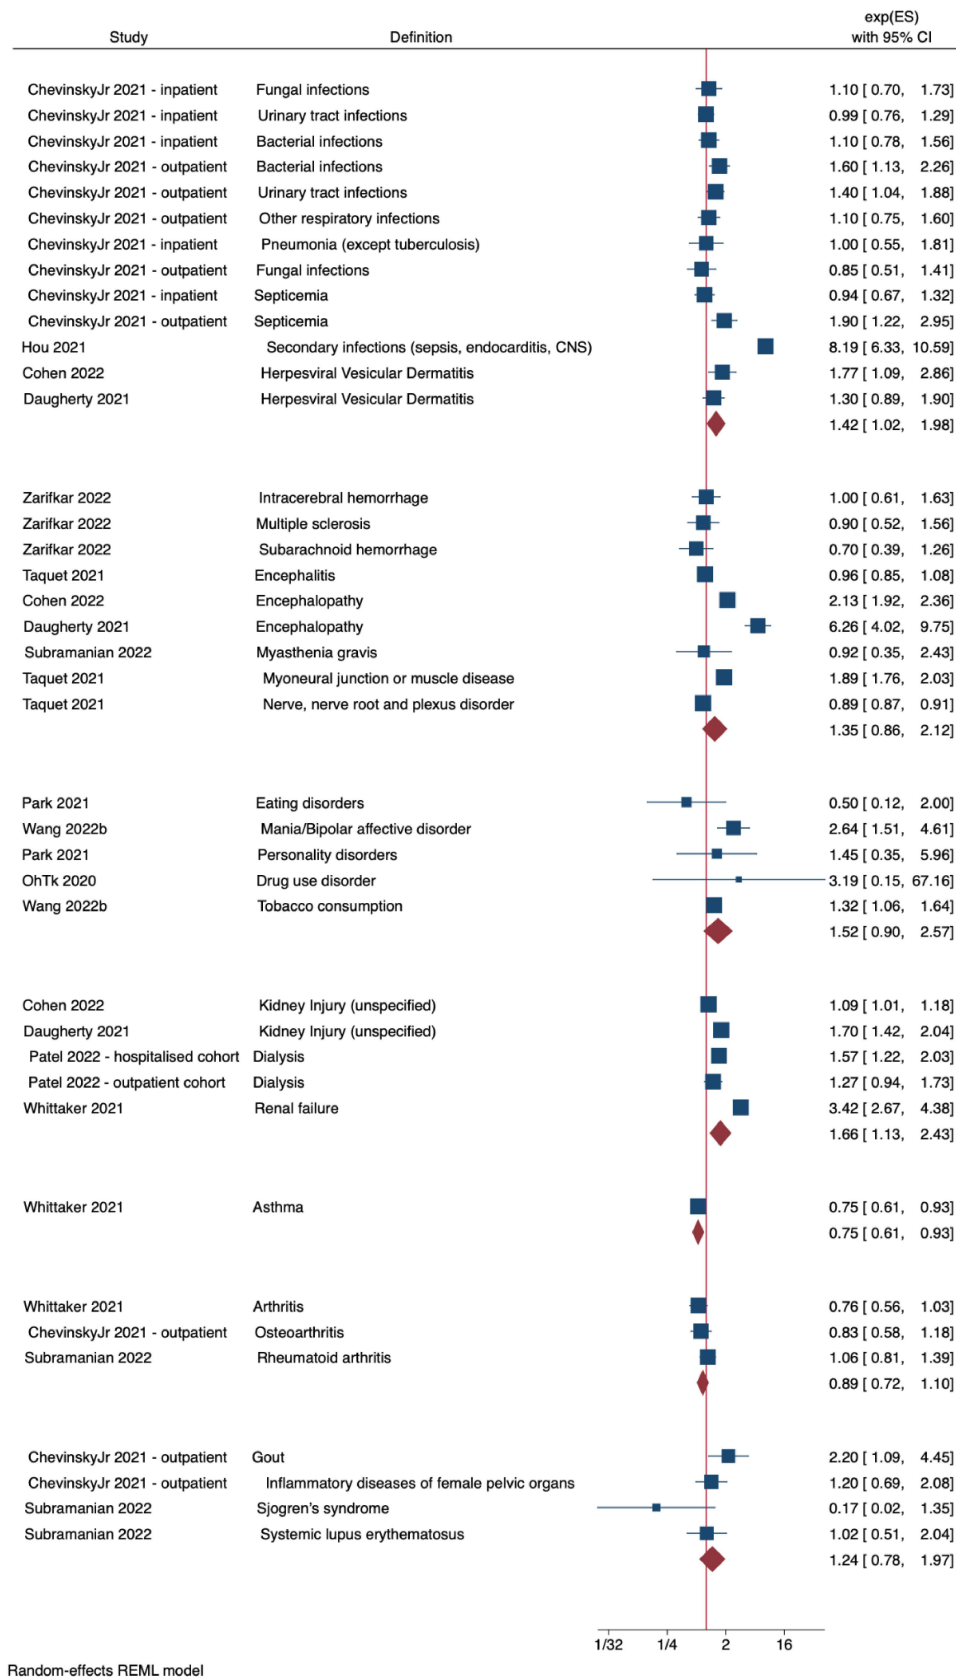

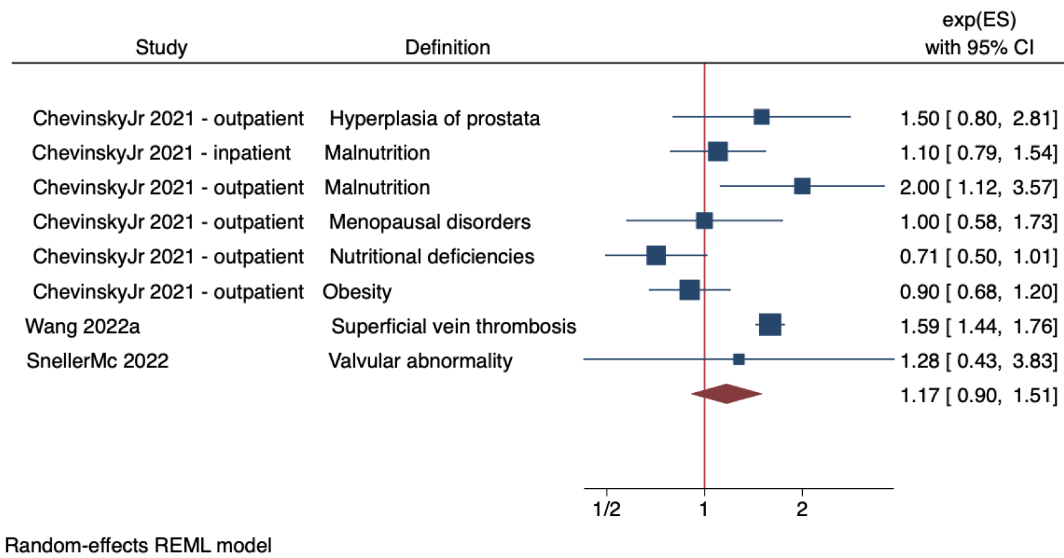

## Supplementary table. Estimated rates of incident diagnosis in covid and control groups.

| Group          | Outcome                        | Median rate in the control group | Estimated rate in the covid group |
|----------------|--------------------------------|----------------------------------|-----------------------------------|
| Metabolic      | Diabetes                       | 0.54%                            | 0.85% (0.69% to 1.04%)            |
| Metabolic      | Thyroid disease                | 0.00%                            | 0.00% (0.00% to 0.01%)            |
| Psychiatric    | Any psychiatric disorder       | 7.61%                            | 10.58% (9.59% to 11.57%)          |
| Psychiatric    | Mood disorders                 | 3.70%                            | 8.11% (7.11% to 9.25%)            |
| Psychiatric    | Depressive disorders           | 1.00%                            | 1.50% (1.12% to 2.01%)            |
| Psychiatric    | Anxiety disorder               | 1.17%                            | 1.41% (1.16% to 1.70%)            |
| Psychiatric    | Panic disorder                 | 0.22%                            | 0.24% (0.04% to 1.33%)            |
| Psychiatric    | Post-traumatic stress disorder | 0.75%                            | 1.00% (0.42% to 2.36%)            |
| Psychiatric    | Psychosis                      | 0.19%                            | 0.42% (0.32% to 0.55%)            |
| Psychiatric    | Any substance use disorders    | 0.26%                            | 0.33% (0.17% to 0.63%)            |
| Psychiatric    | Alcohol use disorder           | N/A                              | N/A                               |
| Cardiovascular | All cardiovascular             | 0.54%                            | 1.18% (0.40% to 3.52%)            |
| Cardiovascular | Arterial Hypertension          | 1.84%                            | 2.14% (1.69% to 2.71%)            |
| Cardiovascular | Pulmonary hypertension         | 0.47%                            | 0.92% (0.00% to 100.00%)          |
| Cardiovascular | Heart failure                  | 0.83%                            | 0.99% (0.66% to 1.49%)            |
| Cardiovascular | Postural Tachycardia Syndrome  | 0.50%                            | 0.94% (0.03% to 30.65%)           |
| Cardiovascular | Myocarditis                    | 0.01%                            | 0.02% (0.00% to 0.90%)            |
| Cardiovascular | Pericarditis                   | 0.02%                            | 0.03% (0.02% to 0.03%)            |
| Cardiovascular | Myocardial infarction          | 0.50%                            | 0.64% (0.45% to 0.90%)            |
| Cardiovascular | Cardiogenic shock              | 0.03%                            | 0.03% (0.00% to 6.85%)            |
| Cardiovascular | Cardiomyopathy                 | 0.04%                            | 0.15% (0.10% to 0.21%)            |
| Cardiovascular | Peripheral artery disease      | 0.50%                            | 0.48% (0.26% to 0.91%)            |
| Cardiovascular | Deep vein thrombosis           | 0.19%                            | 0.59% (0.16% to 2.20%)            |
| Cardiovascular | Pulmonary embolism             | 0.24%                            | 0.57% (0.31% to 1.03%)            |
| Cardiovascular | Hemorrhagic stroke             | 0.46%                            | 0.80% (0.55% to 1.15%)            |
| Cardiovascular | Stroke (general)               | 0.60%                            | 14.87% (14.51% to 15.23%)         |
| Neurological   | Sensory disorders              | 11.90%                           | 3.21% (2.04% to 5.06%)            |
| Neurological   | Cognitive impairment           | 1.65%                            | 1.30% (0.77% to 2.20%)            |
| Neurological   | Dementia                       | 0.98%                            | 0.03% (0.01% to 0.15%)            |
| Neurological   | Alzheimer's disease            | 0.02%                            | 0.04% (0.02% to 0.09%)            |

|              |                                             |       |                          |
|--------------|---------------------------------------------|-------|--------------------------|
| Neurological | Extrapyramidal and other movement disorders | 0.03% | 1.49% (0.81% to 2.72%)   |
| Neurological | Sleep apnea                                 | 1.27% | 3.20% (2.45% to 4.20%)   |
| Neurological | Other sleep disorders                       | 2.50% | 0.77% (0.50% to 1.18%)   |
| Neurological | Peripheral neuropathy                       | 0.56% | 0.31% (0.24% to 0.40%)   |
| Neurological | Epilepsy or seizure                         | 0.18% | 0.01% (0.00% to 0.04%)   |
| Neurological | Guillain Barré syndrome                     | 0.00% | 0.24% (0.19% to 0.30%)   |
| Neurological | Headaches and migraine                      | 0.20% | 5.79% (4.42% to 7.64%)   |
| Renal        | Acute kidney injury                         | 4.29% | 1.70% (1.28% to 2.28%)   |
| Renal        | Chronic kidney injury                       | 1.35% | 5.91% (2.00% to 17.51%)  |
| Renal        | Fluid and electrolyte disorders             | 4.66% | 1.19% (0.60% to 2.37%)   |
| Hepatic      | Liver disease                               | 0.74% | 2.63% (1.05% to 6.56%)   |
| Pulmonary    | Lung disorders                              | 0.82% | 2.00% (0.02% to 100.00%) |
| Pulmonary    | Acute respiratory failure                   | 0.74% | 1.42% (0.00% to 100.00%) |
| Pulmonary    | Chronic respiratory failure                 | 0.22% | 1.75% (0.24% to 12.88%)  |
| Pulmonary    | Respiratory failure (unspecified)           | 1.03% | 1.37% (0.87% to 2.14%)   |
| Hematic      | Coagulopathy                                | 0.82% | 2.18% (0.36% to 13.31%)  |
| Hematic      | Anemia                                      | 1.32% | 0.12% (0.06% to 0.25%)   |
| Dermal       | Urticaria                                   | 0.08% | 0.21% (0.02% to 1.96%)   |
| Dermal       | Atopic dermatitis                           | 0.20% | 0.85% (0.69% to 1.04%)   |

N/A Not available
